# Supplementary material
Source: publisher figshare collection journal article supplement (https://gsajournals.figshare.com/ndownloader/files/11285867)
Supplement: Supplementary file 1 [file 11285867]

TDU_consensed_contig_38129	3	701	TDU_consensed_contig_38129,TPO_consensed_contig_72352	.	+
TDU_consensed_contig_38130	5	755	TDU_consensed_contig_38130,TPO_consensed_contig_104729	.	+
TDU_consensed_contig_38132	145	1917	TDU_consensed_contig_38132,TPO_consensed_contig_96350	.	+
TDU_consensed_contig_38133	0	705	TDU_consensed_contig_38133,TPO_consensed_contig_110463	.	+
TDU_consensed_contig_38134	0	1596	TDU_consensed_contig_38134,TPO_consensed_contig_18117	.	+
TDU_consensed_contig_38135	189	2931	TDU_consensed_contig_38135,TPO_consensed_contig_40607	.	+
TDU_consensed_contig_38139	0	673	TDU_consensed_contig_38139,TPO_consensed_contig_39234	.	+
TDU_consensed_contig_38140	0	941	TDU_consensed_contig_38140,TPO_consensed_contig_36030	.	+
TDU_consensed_contig_38141	13	1330	TDU_consensed_contig_38141,TPO_consensed_contig_27706	.	+
TDU_consensed_contig_38144	0	1483	TDU_consensed_contig_38144,TPO_consensed_contig_35418	.	+
TDU_consensed_contig_38146	0	1125	TDU_consensed_contig_38146,TPO_consensed_contig_96082	.	+
TDU_consensed_contig_38147	6	1235	TDU_consensed_contig_38147,TPO_consensed_contig_105762	.	+
TDU_consensed_contig_38148	6	1471	TDU_consensed_contig_38148,TPO_consensed_contig_39081	.	+
TDU_consensed_contig_38149	6	1147	TDU_consensed_contig_38149,TPO_consensed_contig_105763	.	+
TDU_consensed_contig_38150	6	984	TDU_consensed_contig_38150,TPO_consensed_contig_105761	.	+
TDU_consensed_contig_38156	2	1215	TDU_consensed_contig_38156,TPO_consensed_contig_18995	.	+
TDU_consensed_contig_38164	0	1149	TDU_consensed_contig_38164,TPO_consensed_contig_27566	.	+
TDU_consensed_contig_38166	15	931	TDU_consensed_contig_38166,TPO_consensed_contig_32696	.	+
TDU_consensed_contig_38167	0	855	TDU_consensed_contig_38167,TPO_consensed_contig_103980	.	+
TDU_consensed_contig_38168	799	2777	TDU_consensed_contig_38168,TPO_consensed_contig_36184	.	+
TDU_consensed_contig_38169	0	760	TDU_consensed_contig_38169,TPO_consensed_contig_102208	.	+
TDU_consensed_contig_38172	5	1281	TDU_consensed_contig_38172,TPO_consensed_contig_73195	.	+
TDU_consensed_contig_38175	0	701	TDU_consensed_contig_38175,TPO_consensed_contig_40331	.	+
TDU_consensed_contig_38177	1	1786	TDU_consensed_contig_38177,TPO_consensed_contig_38615	.	+
TDU_consensed_contig_38179	0	880	TDU_consensed_contig_38179,TPO_consensed_contig_35046	.	+
TDU_consensed_contig_38182	65	820	TDU_consensed_contig_38182,TPO_consensed_contig_102632	.	+
TDU_consensed_contig_38184	0	2056	TDU_consensed_contig_38184,TPO_consensed_contig_98918	.	+
TDU_consensed_contig_38186	28	536	TDU_consensed_contig_38186,TPO_consensed_contig_114429	.	+
TDU_consensed_contig_38187	45	1537	TDU_consensed_contig_38187,TPO_consensed_contig_80912	.	+
TDU_consensed_contig_38188	20	978	TDU_consensed_contig_38188,TPO_consensed_contig_89071	.	+
TDU_consensed_contig_38189	74	2510	TDU_consensed_contig_38189,TPO_consensed_contig_116708	.	+
TDU_consensed_contig_38190	0	1052	TDU_consensed_contig_38190,TPO_consensed_contig_38783	.	+
TDU_consensed_contig_38191	36	1355	TDU_consensed_contig_38191,TPO_consensed_contig_3109	.	+
TDU_consensed_contig_38193	54	898	TDU_consensed_contig_38193,TPO_consensed_contig_27883	.	+
TDU_consensed_contig_38195	0	1188	TDU_consensed_contig_38195,TPO_consensed_contig_84632	.	+
TDU_consensed_contig_38196	24	536	TDU_consensed_contig_38196,TPO_consensed_contig_36325	.	+
TDU_consensed_contig_38198	58	757	TDU_consensed_contig_38198,TPO_consensed_contig_36860	.	+
TDU_consensed_contig_38199	0	512	TDU_consensed_contig_38199,TPO_consensed_contig_27426	.	+
TDU_consensed_contig_38200	83	1700	TDU_consensed_contig_38200,TPO_consensed_contig_90552	.	+
TDU_consensed_contig_38201	25	791	TDU_consensed_contig_38201,TPO_consensed_contig_46692	.	+
TDU_consensed_contig_38204	0	2781	TDU_consensed_contig_38204,TPO_consensed_contig_110308	.	+
TDU_consensed_contig_38205	0	2707	TDU_consensed_contig_38205,TPO_consensed_contig_16556	.	+
TDU_consensed_contig_38206	0	1311	TDU_consensed_contig_38206,TPO_consensed_contig_39139	.	+
TDU_consensed_contig_38207	0	575	TDU_consensed_contig_38207,TPO_consensed_contig_66162	.	+
TDU_consensed_contig_38216	0	838	TDU_consensed_contig_38216,TPO_consensed_contig_63925	.	+
TDU_consensed_contig_38221	0	1425	TDU_consensed_contig_38221,TPO_consensed_contig_42500	.	+
TDU_consensed_contig_38224	1144	1878	TDU_consensed_contig_38224,TPO_consensed_contig_51262	.	+
TDU_consensed_contig_38226	0	834	TDU_consensed_contig_38226,TPO_consensed_contig_5808	.	+
TDU_consensed_contig_38232	6	678	TDU_consensed_contig_38232,TPO_consensed_contig_87297	.	+
TDU_consensed_contig_38238	324	1113	TDU_consensed_contig_38238,TPO_consensed_contig_28268	.	+
TDU_consensed_contig_38239	0	1501	TDU_consensed_contig_38239,TPO_consensed_contig_12004	.	+
TDU_consensed_contig_38240	0	2127	TDU_consensed_contig_38240,TPO_consensed_contig_37041	.	+
TDU_consensed_contig_38242	35	1301	TDU_consensed_contig_38242,TPO_consensed_contig_61722	.	+
TDU_consensed_contig_38243	41	1603	TDU_consensed_contig_38243,TPO_consensed_contig_61735	.	+
TDU_consensed_contig_38248	1	1435	TDU_consensed_contig_38248,TPO_consensed_contig_100225	.	+
TDU_consensed_contig_38250	0	1680	TDU_consensed_contig_38250,TPO_consensed_contig_34290	.	+
TDU_consensed_contig_38251	2	2112	TDU_consensed_contig_38251,TPO_consensed_contig_38833	.	+
TDU_consensed_contig_38252	0	2291	TDU_consensed_contig_38252,TPO_consensed_contig_9082	.	+
TDU_consensed_contig_38256	8	1336	TDU_consensed_contig_38256,TPO_consensed_contig_32210	.	+
TDU_consensed_contig_38257	2105	2661	TDU_consensed_contig_38257,TPO_consensed_contig_36678	.	+
TDU_consensed_contig_38263	0	995	TDU_consensed_contig_38263,TPO_consensed_contig_13325	.	+
TDU_consensed_contig_38265	1	1446	TDU_consensed_contig_38265,TPO_consensed_contig_33491	.	+
TDU_consensed_contig_38266	0	1491	TDU_consensed_contig_38266,TPO_consensed_contig_46072	.	+
TDU_consensed_contig_38269	1	1320	TDU_consensed_contig_38269,TPO_consensed_contig_32928	.	+
TDU_consensed_contig_38273	14	1954	TDU_consensed_contig_38273,TPO_consensed_contig_40721	.	+
TDU_consensed_contig_38275	0	1422	TDU_consensed_contig_38275,TPO_consensed_contig_46331	.	+
TDU_consensed_contig_38280	3	1611	TDU_consensed_contig_38280,TPO_consensed_contig_11673	.	+
TDU_consensed_contig_38281	0	845	TDU_consensed_contig_38281,TPO_consensed_contig_35991	.	+
TDU_consensed_contig_38282	47	554	TDU_consensed_contig_38282,TPO_consensed_contig_27659	.	+
TDU_consensed_contig_38285	1	687	TDU_consensed_contig_38285,TPO_consensed_contig_46691	.	+
TDU_consensed_contig_38297	0	2915	TDU_consensed_contig_38297,TPO_consensed_contig_9774	.	+
TDU_consensed_contig_38301	0	969	TDU_consensed_contig_38301,TPO_consensed_contig_46589	.	+
TDU_consensed_contig_38302	68	2626	TDU_consensed_contig_38302,TPO_consensed_contig_37292	.	+
TDU_consensed_contig_38304	0	1343	TDU_consensed_contig_38304,TPO_consensed_contig_96336	.	+
TDU_consensed_contig_38305	0	727	TDU_consensed_contig_38305,TPO_consensed_contig_97485	.	+
TDU_consensed_contig_38308	29	1309	TDU_consensed_contig_38308,TPO_consensed_contig_33600	.	+
TDU_consensed_contig_38312	0	2315	TDU_consensed_contig_38312,TPO_consensed_contig_38572	.	+
TDU_consensed_contig_38316	0	1416	TDU_consensed_contig_38316,TPO_consensed_contig_5276	.	+
TDU_consensed_contig_38317	0	869	TDU_consensed_contig_38317,TPO_consensed_contig_87897	.	+
TDU_consensed_contig_38319	0	657	TDU_consensed_contig_38319,TPO_consensed_contig_16616	.	+
TDU_consensed_contig_38322	871	1986	TDU_consensed_contig_38322,TPO_consensed_contig_35173	.	+
TDU_consensed_contig_38323	21	2468	TDU_consensed_contig_38323,TPO_consensed_contig_39440	.	+
TDU_consensed_contig_38325	1	1520	TDU_consensed_contig_38325,TPO_consensed_contig_32990	.	+
TDU_consensed_contig_38326	0	2311	TDU_consensed_contig_38326,TPO_consensed_contig_17446	.	+
TDU_consensed_contig_38327	11	2354	TDU_consensed_contig_38327,TPO_consensed_contig_32644	.	+
TDU_consensed_contig_38328	132	1124	TDU_consensed_contig_38328,TPO_consensed_contig_32675	.	+
TDU_consensed_contig_38330	188	1483	TDU_consensed_contig_38330,TPO_consensed_contig_27580	.	+
TDU_consensed_contig_38333	11	3342	TDU_consensed_contig_38333,TPO_consensed_contig_35050	.	+
TDU_consensed_contig_38335	10	1967	TDU_consensed_contig_38335,TPO_consensed_contig_38272	.	+
TDU_consensed_contig_38337	0	1297	TDU_consensed_contig_38337,TPO_consensed_contig_101253	.	+
TDU_consensed_contig_38339	14	1283	TDU_consensed_contig_38339,TPO_consensed_contig_102122	.	+
TDU_consensed_contig_38340	0	3196	TDU_consensed_contig_38340,TPO_consensed_contig_9970	.	+
TDU_consensed_contig_38343	235	784	TDU_consensed_contig_38343,TPO_consensed_contig_73748	.	+
TDU_consensed_contig_38350	15	1258	TDU_consensed_contig_38350,TPO_consensed_contig_100799	.	+
TDU_consensed_contig_38351	0	1114	TDU_consensed_contig_38351,TPO_consensed_contig_13309	.	+
TDU_consensed_contig_38356	0	1987	TDU_consensed_contig_38356,TPO_consensed_contig_44407	.	+
TDU_consensed_contig_38358	0	543	TDU_consensed_contig_38358,TPO_consensed_contig_58301	.	+
TDU_consensed_contig_38360	1	1323	TDU_consensed_contig_38360,TPO_consensed_contig_13043	.	+
TDU_consensed_contig_38364	0	966	TDU_consensed_contig_38364,TPO_consensed_contig_38114	.	+
TDU_consensed_contig_38370	39	1396	TDU_consensed_contig_38370,TPO_consensed_contig_105367	.	+
TDU_consensed_contig_38374	11	1470	TDU_consensed_contig_38374,TPO_consensed_contig_59188	.	+
TDU_consensed_contig_38379	0	1590	TDU_consensed_contig_38379,TPO_consensed_contig_27844	.	+
TDU_consensed_contig_38380	1	1678	TDU_consensed_contig_38380,TPO_consensed_contig_38534	.	+
TDU_consensed_contig_38384	0	849	TDU_consensed_contig_38384,TPO_consensed_contig_37504	.	+
TDU_consensed_contig_38385	0	2328	TDU_consensed_contig_38385,TPO_consensed_contig_37505	.	+
TDU_consensed_contig_38388	0	987	TDU_consensed_contig_38388,TPO_consensed_contig_41160	.	+
TDU_consensed_contig_38392	0	1315	TDU_consensed_contig_38392,TPO_consensed_contig_96434	.	+
TDU_consensed_contig_38393	0	2260	TDU_consensed_contig_38393,TPO_consensed_contig_62893	.	+
TDU_consensed_contig_38397	7	2008	TDU_consensed_contig_38397,TPO_consensed_contig_32345	.	+
TDU_consensed_contig_38401	0	645	TDU_consensed_contig_38401,TPO_consensed_contig_85926	.	+
TDU_consensed_contig_38402	0	1170	TDU_consensed_contig_38402,TPO_consensed_contig_38847	.	+
TDU_consensed_contig_38404	0	2387	TDU_consensed_contig_38404,TPO_consensed_contig_13128	.	+
TDU_consensed_contig_38408	0	1074	TDU_consensed_contig_38408,TPO_consensed_contig_91070	.	+
TDU_consensed_contig_38414	0	2690	TDU_consensed_contig_38414,TPO_consensed_contig_37580	.	+
TDU_consensed_contig_38415	0	2623	TDU_consensed_contig_38415,TPO_consensed_contig_37579	.	+
TDU_consensed_contig_38421	19	1602	TDU_consensed_contig_38421,TPO_consensed_contig_85113	.	+
TDU_consensed_contig_38423	46	1454	TDU_consensed_contig_38423,TPO_consensed_contig_39390	.	+
TDU_consensed_contig_38425	46	1645	TDU_consensed_contig_38425,TPO_consensed_contig_39389	.	+
TDU_consensed_contig_38426	559	2216	TDU_consensed_contig_38426,TPO_consensed_contig_66057	.	+
TDU_consensed_contig_38431	6	1291	TDU_consensed_contig_38431,TPO_consensed_contig_22885	.	+
TDU_consensed_contig_38439	0	1399	TDU_consensed_contig_38439,TPO_consensed_contig_40105	.	+
TDU_consensed_contig_38440	299	1528	TDU_consensed_contig_38440,TPO_consensed_contig_27864	.	+
TDU_consensed_contig_38445	53	1976	TDU_consensed_contig_38445,TPO_consensed_contig_35493	.	+
TDU_consensed_contig_38447	0	860	TDU_consensed_contig_38447,TPO_consensed_contig_39240	.	+
TDU_consensed_contig_38448	0	2211	TDU_consensed_contig_38448,TPO_consensed_contig_43837	.	+
TDU_consensed_contig_38451	75	794	TDU_consensed_contig_38451,TPO_consensed_contig_38502	.	+
TDU_consensed_contig_38453	0	1052	TDU_consensed_contig_38453,TPO_consensed_contig_89570	.	+
TDU_consensed_contig_38459	2	2254	TDU_consensed_contig_38459,TPO_consensed_contig_32034	.	+
TDU_consensed_contig_38461	0	923	TDU_consensed_contig_38461,TPO_consensed_contig_13022	.	+
TDU_consensed_contig_38463	61	1711	TDU_consensed_contig_38463,TPO_consensed_contig_46739	.	+
TDU_consensed_contig_38464	0	1542	TDU_consensed_contig_38464,TPO_consensed_contig_37140	.	+
TDU_consensed_contig_38465	7	1577	TDU_consensed_contig_38465,TPO_consensed_contig_38809	.	+
TDU_consensed_contig_38468	660	1247	TDU_consensed_contig_38468,TPO_consensed_contig_97214	.	+
TDU_consensed_contig_38470	11	4514	TDU_consensed_contig_38470,TPO_consensed_contig_103896	.	+
TDU_consensed_contig_38472	28	1879	TDU_consensed_contig_38472,TPO_consensed_contig_40691	.	+
TDU_consensed_contig_38473	82	1627	TDU_consensed_contig_38473,TPO_consensed_contig_9205	.	+
TDU_consensed_contig_38474	82	1698	TDU_consensed_contig_38474,TPO_consensed_contig_9203	.	+
TDU_consensed_contig_38491	0	766	TDU_consensed_contig_38491,TPO_consensed_contig_17418	.	+
TDU_consensed_contig_38494	0	662	TDU_consensed_contig_38494,TPO_consensed_contig_4339	.	+
TDU_consensed_contig_38495	18	1225	TDU_consensed_contig_38495,TPO_consensed_contig_9609	.	+
TDU_consensed_contig_38497	0	2173	TDU_consensed_contig_38497,TPO_consensed_contig_35381	.	+
TDU_consensed_contig_38498	31	648	TDU_consensed_contig_38498,TPO_consensed_contig_89313	.	+
TDU_consensed_contig_38499	84	668	TDU_consensed_contig_38499,TPO_consensed_contig_29549	.	+
TDU_consensed_contig_38500	0	1143	TDU_consensed_contig_38500,TPO_consensed_contig_18005	.	+
TDU_consensed_contig_38509	21	688	TDU_consensed_contig_38509,TPO_consensed_contig_18044	.	+
TDU_consensed_contig_38510	6	1223	TDU_consensed_contig_38510,TPO_consensed_contig_18043	.	+
TDU_consensed_contig_38511	16	1944	TDU_consensed_contig_38511,TPO_consensed_contig_62713	.	+
TDU_consensed_contig_38513	231	1580	TDU_consensed_contig_38513,TPO_consensed_contig_12579	.	+
TDU_consensed_contig_38514	1	609	TDU_consensed_contig_38514,TPO_consensed_contig_101010	.	+
TDU_consensed_contig_38515	31	770	TDU_consensed_contig_38515,TPO_consensed_contig_98947	.	+
TDU_consensed_contig_38516	135	2005	TDU_consensed_contig_38516,TPO_consensed_contig_41517	.	+
TDU_consensed_contig_38517	8	2459	TDU_consensed_contig_38517,TPO_consensed_contig_25442	.	+
TDU_consensed_contig_38519	59	1437	TDU_consensed_contig_38519,TPO_consensed_contig_115949	.	+
TDU_consensed_contig_38521	0	1168	TDU_consensed_contig_38521,TPO_consensed_contig_32576	.	+
TDU_consensed_contig_38522	206	2265	TDU_consensed_contig_38522,TPO_consensed_contig_33559	.	+
TDU_consensed_contig_38524	44	1799	TDU_consensed_contig_38524,TPO_consensed_contig_7018	.	+
TDU_consensed_contig_38525	0	2077	TDU_consensed_contig_38525,TPO_consensed_contig_35954	.	+
TDU_consensed_contig_38532	330	830	TDU_consensed_contig_38532,TPO_consensed_contig_81085	.	+
TDU_consensed_contig_38533	63	1696	TDU_consensed_contig_38533,TPO_consensed_contig_112095	.	+
TDU_consensed_contig_38541	26	1568	TDU_consensed_contig_38541,TPO_consensed_contig_104838	.	+
TDU_consensed_contig_38546	31	2235	TDU_consensed_contig_38546,TPO_consensed_contig_5873	.	+
TDU_consensed_contig_38547	66	3450	TDU_consensed_contig_38547,TPO_consensed_contig_43516	.	+
TDU_consensed_contig_38548	40	1500	TDU_consensed_contig_38548,TPO_consensed_contig_16095	.	+
TDU_consensed_contig_38549	7	632	TDU_consensed_contig_38549,TPO_consensed_contig_84728	.	+
TDU_consensed_contig_38550	58	2533	TDU_consensed_contig_38550,TPO_consensed_contig_9649	.	+
TDU_consensed_contig_38552	602	1586	TDU_consensed_contig_38552,TPO_consensed_contig_16477	.	+
TDU_consensed_contig_38560	62	685	TDU_consensed_contig_38560,TPO_consensed_contig_8943	.	+
TDU_consensed_contig_38561	16	839	TDU_consensed_contig_38561,TPO_consensed_contig_35835	.	+
TDU_consensed_contig_38562	0	1992	TDU_consensed_contig_38562,TPO_consensed_contig_4453	.	+
TDU_consensed_contig_38563	2691	3224	TDU_consensed_contig_38563,TPO_consensed_contig_22509	.	+
TDU_consensed_contig_38569	517	2050	TDU_consensed_contig_38569,TPO_consensed_contig_5063	.	+
TDU_consensed_contig_38571	5	1980	TDU_consensed_contig_38571,TPO_consensed_contig_106067	.	+
TDU_consensed_contig_38573	15	671	TDU_consensed_contig_38573,TPO_consensed_contig_89091	.	+
TDU_consensed_contig_38574	735	1926	TDU_consensed_contig_38574,TPO_consensed_contig_39346	.	+
TDU_consensed_contig_38578	66	3501	TDU_consensed_contig_38578,TPO_consensed_contig_34757	.	+
TDU_consensed_contig_38579	11	1952	TDU_consensed_contig_38579,TPO_consensed_contig_39530	.	+
TDU_consensed_contig_38580	0	628	TDU_consensed_contig_38580,TPO_consensed_contig_97439	.	+
TDU_consensed_contig_38581	13	1817	TDU_consensed_contig_38581,TPO_consensed_contig_96115	.	+
TDU_consensed_contig_38582	10	787	TDU_consensed_contig_38582,TPO_consensed_contig_84341	.	+
TDU_consensed_contig_38583	32	1846	TDU_consensed_contig_38583,TPO_consensed_contig_12990	.	+
TDU_consensed_contig_38585	1346	1865	TDU_consensed_contig_38585,TPO_consensed_contig_107645	.	+
TDU_consensed_contig_38590	24	2137	TDU_consensed_contig_38590,TPO_consensed_contig_33411	.	+
TDU_consensed_contig_38591	28	1861	TDU_consensed_contig_38591,TPO_consensed_contig_39353	.	+
TDU_consensed_contig_38594	188	925	TDU_consensed_contig_38594,TPO_consensed_contig_17784	.	+
TDU_consensed_contig_38596	149	2705	TDU_consensed_contig_38596,TPO_consensed_contig_38438	.	+
TDU_consensed_contig_38597	149	2634	TDU_consensed_contig_38597,TPO_consensed_contig_38437	.	+
TDU_consensed_contig_38599	6	897	TDU_consensed_contig_38599,TPO_consensed_contig_46250	.	+
TDU_consensed_contig_38601	1	1619	TDU_consensed_contig_38601,TPO_consensed_contig_10217	.	+
TDU_consensed_contig_38604	1	1162	TDU_consensed_contig_38604,TPO_consensed_contig_45813	.	+
TDU_consensed_contig_38606	18	1296	TDU_consensed_contig_38606,TPO_consensed_contig_33514	.	+
TDU_consensed_contig_38607	0	1891	TDU_consensed_contig_38607,TPO_consensed_contig_36816	.	+
TDU_consensed_contig_38608	0	1806	TDU_consensed_contig_38608,TPO_consensed_contig_36815	.	+
TDU_consensed_contig_38609	1	814	TDU_consensed_contig_38609,TPO_consensed_contig_101074	.	+
TDU_consensed_contig_38610	0	1125	TDU_consensed_contig_38610,TPO_consensed_contig_9585	.	+
TDU_consensed_contig_38613	1424	2912	TDU_consensed_contig_38613,TPO_consensed_contig_5163	.	+
TDU_consensed_contig_38614	0	1906	TDU_consensed_contig_38614,TPO_consensed_contig_116745	.	+
TDU_consensed_contig_38615	0	2012	TDU_consensed_contig_38615,TPO_consensed_contig_37297	.	+
TDU_consensed_contig_38616	1084	1923	TDU_consensed_contig_38616,TPO_consensed_contig_9597	.	+
TDU_consensed_contig_38617	10	1506	TDU_consensed_contig_38617,TPO_consensed_contig_27728	.	+
TDU_consensed_contig_38618	0	615	TDU_consensed_contig_38618,TPO_consensed_contig_38254	.	+
TDU_consensed_contig_38621	565	1471	TDU_consensed_contig_38621,TPO_consensed_contig_16099	.	+
TDU_consensed_contig_38622	0	1485	TDU_consensed_contig_38622,TPO_consensed_contig_36656	.	+
TDU_consensed_contig_38623	0	2930	TDU_consensed_contig_38623,TPO_consensed_contig_35875	.	+
TDU_consensed_contig_38626	415	2502	TDU_consensed_contig_38626,TPO_consensed_contig_37305	.	+
TDU_consensed_contig_38627	15	1559	TDU_consensed_contig_38627,TPO_consensed_contig_38507	.	+
TDU_consensed_contig_38634	0	693	TDU_consensed_contig_38634,TPO_consensed_contig_5434	.	+
TDU_consensed_contig_38639	40	1389	TDU_consensed_contig_38639,TPO_consensed_contig_100942	.	+
TDU_consensed_contig_38640	30	1491	TDU_consensed_contig_38640,TPO_consensed_contig_9760	.	+
TDU_consensed_contig_38641	0	3143	TDU_consensed_contig_38641,TPO_consensed_contig_34754	.	+
TDU_consensed_contig_38643	0	905	TDU_consensed_contig_38643,TPO_consensed_contig_97631	.	+
TDU_consensed_contig_38645	0	806	TDU_consensed_contig_38645,TPO_consensed_contig_87677	.	+
TDU_consensed_contig_38646	0	956	TDU_consensed_contig_38646,TPO_consensed_contig_87679	.	+
TDU_consensed_contig_38648	0	1656	TDU_consensed_contig_38648,TPO_consensed_contig_20563	.	+
TDU_consensed_contig_38649	31	669	TDU_consensed_contig_38649,TPO_consensed_contig_40610	.	+
TDU_consensed_contig_38652	22	1553	TDU_consensed_contig_38652,TPO_consensed_contig_4717	.	+
TDU_consensed_contig_38653	6	1679	TDU_consensed_contig_38653,TPO_consensed_contig_38380	.	+
TDU_consensed_contig_38655	452	1534	TDU_consensed_contig_38655,TPO_consensed_contig_35378	.	+
TDU_consensed_contig_38657	0	1785	TDU_consensed_contig_38657,TPO_consensed_contig_32850	.	+
TDU_consensed_contig_38663	0	1213	TDU_consensed_contig_38663,TPO_consensed_contig_100876	.	+
TDU_consensed_contig_38664	6	3582	TDU_consensed_contig_38664,TPO_consensed_contig_39106	.	+
TDU_consensed_contig_38667	58	2477	TDU_consensed_contig_38667,TPO_consensed_contig_63180	.	+
TDU_consensed_contig_38670	1	3037	TDU_consensed_contig_38670,TPO_consensed_contig_40135	.	+
TDU_consensed_contig_38671	1	2961	TDU_consensed_contig_38671,TPO_consensed_contig_40131	.	+
TDU_consensed_contig_38674	186	2060	TDU_consensed_contig_38674,TPO_consensed_contig_11284	.	+
TDU_consensed_contig_38675	0	3226	TDU_consensed_contig_38675,TPO_consensed_contig_42215	.	+
TDU_consensed_contig_38676	21	1230	TDU_consensed_contig_38676,TPO_consensed_contig_107225	.	+
TDU_consensed_contig_38677	21	1414	TDU_consensed_contig_38677,TPO_consensed_contig_10363	.	+
TDU_consensed_contig_38678	29	971	TDU_consensed_contig_38678,TPO_consensed_contig_12669	.	+
TDU_consensed_contig_38682	25	2064	TDU_consensed_contig_38682,TPO_consensed_contig_38559	.	+
TDU_consensed_contig_38683	25	1938	TDU_consensed_contig_38683,TPO_consensed_contig_38558	.	+
TDU_consensed_contig_38684	36	868	TDU_consensed_contig_38684,TPO_consensed_contig_83859	.	+
TDU_consensed_contig_38685	243	973	TDU_consensed_contig_38685,TPO_consensed_contig_17247	.	+
TDU_consensed_contig_38687	0	729	TDU_consensed_contig_38687,TPO_consensed_contig_83215	.	+
TDU_consensed_contig_38692	20	1788	TDU_consensed_contig_38692,TPO_consensed_contig_37351	.	+
TDU_consensed_contig_38697	0	2394	TDU_consensed_contig_38697,TPO_consensed_contig_11759	.	+
TDU_consensed_contig_38698	0	1108	TDU_consensed_contig_38698,TPO_consensed_contig_84189	.	+
TDU_consensed_contig_38704	6	1399	TDU_consensed_contig_38704,TPO_consensed_contig_96108	.	+
TDU_consensed_contig_38705	7	3055	TDU_consensed_contig_38705,TPO_consensed_contig_96130	.	+
TDU_consensed_contig_38707	14	1875	TDU_consensed_contig_38707,TPO_consensed_contig_37534	.	+
TDU_consensed_contig_38711	147	2490	TDU_consensed_contig_38711,TPO_consensed_contig_66836	.	+
TDU_consensed_contig_38713	0	2903	TDU_consensed_contig_38713,TPO_consensed_contig_106150	.	+
TDU_consensed_contig_38714	16	1135	TDU_consensed_contig_38714,TPO_consensed_contig_36018	.	+
TDU_consensed_contig_38715	25	1605	TDU_consensed_contig_38715,TPO_consensed_contig_96621	.	+
TDU_consensed_contig_38716	4	1340	TDU_consensed_contig_38716,TPO_consensed_contig_103032	.	+
TDU_consensed_contig_38721	0	1726	TDU_consensed_contig_38721,TPO_consensed_contig_97824	.	+
TDU_consensed_contig_38724	70	1542	TDU_consensed_contig_38724,TPO_consensed_contig_18659	.	+
TDU_consensed_contig_38731	11	990	TDU_consensed_contig_38731,TPO_consensed_contig_94942	.	+
TDU_consensed_contig_38737	46	2442	TDU_consensed_contig_38737,TPO_consensed_contig_33340	.	+
TDU_consensed_contig_38738	4	1553	TDU_consensed_contig_38738,TPO_consensed_contig_46358	.	+
TDU_consensed_contig_38741	39	835	TDU_consensed_contig_38741,TPO_consensed_contig_83451	.	+
TDU_consensed_contig_38742	0	1975	TDU_consensed_contig_38742,TPO_consensed_contig_41126	.	+
TDU_consensed_contig_38744	8	5917	TDU_consensed_contig_38744,TPO_consensed_contig_32471	.	+
TDU_consensed_contig_38745	1880	5442	TDU_consensed_contig_38745,TPO_consensed_contig_33279	.	+
TDU_consensed_contig_38747	9	2839	TDU_consensed_contig_38747,TPO_consensed_contig_97595	.	+
TDU_consensed_contig_38750	0	1893	TDU_consensed_contig_38750,TPO_consensed_contig_27401	.	+
TDU_consensed_contig_38752	1	2358	TDU_consensed_contig_38752,TPO_consensed_contig_101997	.	+
TDU_consensed_contig_38753	1	3029	TDU_consensed_contig_38753,TPO_consensed_contig_96332	.	+
TDU_consensed_contig_38754	0	950	TDU_consensed_contig_38754,TPO_consensed_contig_43279	.	+
TDU_consensed_contig_38756	0	708	TDU_consensed_contig_38756,TPO_consensed_contig_113438	.	+
TDU_consensed_contig_38757	0	837	TDU_consensed_contig_38757,TPO_consensed_contig_92069	.	+
TDU_consensed_contig_38759	6	2142	TDU_consensed_contig_38759,TPO_consensed_contig_16722	.	+
TDU_consensed_contig_38762	0	1356	TDU_consensed_contig_38762,TPO_consensed_contig_32816	.	+
TDU_consensed_contig_38766	0	1995	TDU_consensed_contig_38766,TPO_consensed_contig_97464	.	+
TDU_consensed_contig_38770	0	1260	TDU_consensed_contig_38770,TPO_consensed_contig_105402	.	+
TDU_consensed_contig_38776	60	3818	TDU_consensed_contig_38776,TPO_consensed_contig_3920	.	+
TDU_consensed_contig_38779	76	806	TDU_consensed_contig_38779,TPO_consensed_contig_65586	.	+
TDU_consensed_contig_38780	0	1427	TDU_consensed_contig_38780,TPO_consensed_contig_16371	.	+
TDU_consensed_contig_38781	2	865	TDU_consensed_contig_38781,TPO_consensed_contig_97111	.	+
TDU_consensed_contig_38785	0	1711	TDU_consensed_contig_38785,TPO_consensed_contig_38245	.	+
TDU_consensed_contig_38786	0	786	TDU_consensed_contig_38786,TPO_consensed_contig_13399	.	+
TDU_consensed_contig_38787	47	1745	TDU_consensed_contig_38787,TPO_consensed_contig_42311	.	+
TDU_consensed_contig_38788	13	1160	TDU_consensed_contig_38788,TPO_consensed_contig_64096	.	+
TDU_consensed_contig_38789	0	2055	TDU_consensed_contig_38789,TPO_consensed_contig_104076	.	+
TDU_consensed_contig_38793	1	929	TDU_consensed_contig_38793,TPO_consensed_contig_13302	.	+
TDU_consensed_contig_38794	7	1909	TDU_consensed_contig_38794,TPO_consensed_contig_17650	.	+
TDU_consensed_contig_38795	334	2489	TDU_consensed_contig_38795,TPO_consensed_contig_99023	.	+
TDU_consensed_contig_38798	2	1441	TDU_consensed_contig_38798,TPO_consensed_contig_94669	.	+
TDU_consensed_contig_38805	82	1958	TDU_consensed_contig_38805,TPO_consensed_contig_27716	.	+
TDU_consensed_contig_38808	0	966	TDU_consensed_contig_38808,TPO_consensed_contig_96390	.	+
TDU_consensed_contig_38815	366	1365	TDU_consensed_contig_38815,TPO_consensed_contig_44839	.	+
TDU_consensed_contig_38825	0	1755	TDU_consensed_contig_38825,TPO_consensed_contig_36925	.	+
TDU_consensed_contig_38835	20	1908	TDU_consensed_contig_38835,TPO_consensed_contig_90225	.	+
TDU_consensed_contig_38836	4	1171	TDU_consensed_contig_38836,TPO_consensed_contig_32603	.	+
TDU_consensed_contig_38838	0	2626	TDU_consensed_contig_38838,TPO_consensed_contig_41358	.	+
TDU_consensed_contig_38844	0	1742	TDU_consensed_contig_38844,TPO_consensed_contig_42826	.	+
TDU_consensed_contig_38846	0	1055	TDU_consensed_contig_38846,TPO_consensed_contig_57772	.	+
TDU_consensed_contig_38854	32	1455	TDU_consensed_contig_38854,TPO_consensed_contig_100947	.	+
TDU_consensed_contig_38855	0	844	TDU_consensed_contig_38855,TPO_consensed_contig_57119	.	+
TDU_consensed_contig_38856	0	1705	TDU_consensed_contig_38856,TPO_consensed_contig_13308	.	+
TDU_consensed_contig_38857	0	783	TDU_consensed_contig_38857,TPO_consensed_contig_12941	.	+
TDU_consensed_contig_38858	27	892	TDU_consensed_contig_38858,TPO_consensed_contig_11360	.	+
TDU_consensed_contig_38867	0	772	TDU_consensed_contig_38867,TPO_consensed_contig_110679	.	+
TDU_consensed_contig_38868	0	824	TDU_consensed_contig_38868,TPO_consensed_contig_18839	.	+
TDU_consensed_contig_38870	46	1144	TDU_consensed_contig_38870,TPO_consensed_contig_34758	.	+
TDU_consensed_contig_38871	18	2928	TDU_consensed_contig_38871,TPO_consensed_contig_4288	.	+
TDU_consensed_contig_38872	221	2860	TDU_consensed_contig_38872,TPO_consensed_contig_9477	.	+
TDU_consensed_contig_38874	11	1251	TDU_consensed_contig_38874,TPO_consensed_contig_40353	.	+
TDU_consensed_contig_38875	1	4612	TDU_consensed_contig_38875,TPO_consensed_contig_13129	.	+
TDU_consensed_contig_38876	54	1999	TDU_consensed_contig_38876,TPO_consensed_contig_38154	.	+
TDU_consensed_contig_38877	52	1748	TDU_consensed_contig_38877,TPO_consensed_contig_17031	.	+
TDU_consensed_contig_38878	197	1037	TDU_consensed_contig_38878,TPO_consensed_contig_104140	.	+
TDU_consensed_contig_38879	59	1773	TDU_consensed_contig_38879,TPO_consensed_contig_37126	.	+
TDU_consensed_contig_38888	131	1491	TDU_consensed_contig_38888,TPO_consensed_contig_39739	.	+
TDU_consensed_contig_38891	1	1274	TDU_consensed_contig_38891,TPO_consensed_contig_85426	.	+
TDU_consensed_contig_38894	61	1540	TDU_consensed_contig_38894,TPO_consensed_contig_16474	.	+
TDU_consensed_contig_38897	5	1063	TDU_consensed_contig_38897,TPO_consensed_contig_83370	.	+
TDU_consensed_contig_38898	0	2543	TDU_consensed_contig_38898,TPO_consensed_contig_9611	.	+
TDU_consensed_contig_38899	55	3228	TDU_consensed_contig_38899,TPO_consensed_contig_37285	.	+
TDU_consensed_contig_38901	29	2737	TDU_consensed_contig_38901,TPO_consensed_contig_36009	.	+
TDU_consensed_contig_38905	8	1685	TDU_consensed_contig_38905,TPO_consensed_contig_33096	.	+
TDU_consensed_contig_38911	21	1437	TDU_consensed_contig_38911,TPO_consensed_contig_73202	.	+
TDU_consensed_contig_38912	19	2164	TDU_consensed_contig_38912,TPO_consensed_contig_19659	.	+
TDU_consensed_contig_38916	323	1530	TDU_consensed_contig_38916,TPO_consensed_contig_24914	.	+
TDU_consensed_contig_38923	218	4330	TDU_consensed_contig_38923,TPO_consensed_contig_8653	.	+
TDU_consensed_contig_38928	18	2627	TDU_consensed_contig_38928,TPO_consensed_contig_8770	.	+
TDU_consensed_contig_38930	18	2501	TDU_consensed_contig_38930,TPO_consensed_contig_5908	.	+
TDU_consensed_contig_38931	0	851	TDU_consensed_contig_38931,TPO_consensed_contig_88386	.	+
TDU_consensed_contig_38932	0	999	TDU_consensed_contig_38932,TPO_consensed_contig_88385	.	+
TDU_consensed_contig_38945	10	1908	TDU_consensed_contig_38945,TPO_consensed_contig_35745	.	+
TDU_consensed_contig_38946	10	1652	TDU_consensed_contig_38946,TPO_consensed_contig_57135	.	+
TDU_consensed_contig_38947	142	1393	TDU_consensed_contig_38947,TPO_consensed_contig_101699	.	+
TDU_consensed_contig_38948	1	2807	TDU_consensed_contig_38948,TPO_consensed_contig_17905	.	+
TDU_consensed_contig_38949	0	1177	TDU_consensed_contig_38949,TPO_consensed_contig_16645	.	+
TDU_consensed_contig_38951	1096	1692	TDU_consensed_contig_38951,TPO_consensed_contig_88491	.	+
TDU_consensed_contig_38953	0	1011	TDU_consensed_contig_38953,TPO_consensed_contig_7797	.	+
TDU_consensed_contig_38955	22	2467	TDU_consensed_contig_38955,TPO_consensed_contig_35344	.	+
TDU_consensed_contig_38960	0	997	TDU_consensed_contig_38960,TPO_consensed_contig_37492	.	+
TDU_consensed_contig_38962	99	2371	TDU_consensed_contig_38962,TPO_consensed_contig_8751	.	+
TDU_consensed_contig_38964	125	1338	TDU_consensed_contig_38964,TPO_consensed_contig_98723	.	+
TDU_consensed_contig_38967	88	1004	TDU_consensed_contig_38967,TPO_consensed_contig_34043	.	+
TDU_consensed_contig_38971	18	1373	TDU_consensed_contig_38971,TPO_consensed_contig_35655	.	+
TDU_consensed_contig_38975	0	1036	TDU_consensed_contig_38975,TPO_consensed_contig_32364	.	+
TDU_consensed_contig_38977	3	1951	TDU_consensed_contig_38977,TPO_consensed_contig_16040	.	+
TDU_consensed_contig_38979	2731	5750	TDU_consensed_contig_38979,TPO_consensed_contig_8865	.	+
TDU_consensed_contig_38980	0	3135	TDU_consensed_contig_38980,TPO_consensed_contig_33848	.	+
TDU_consensed_contig_38981	0	1436	TDU_consensed_contig_38981,TPO_consensed_contig_70974	.	+
TDU_consensed_contig_38983	381	1118	TDU_consensed_contig_38983,TPO_consensed_contig_18928	.	+
TDU_consensed_contig_38986	360	887	TDU_consensed_contig_38986,TPO_consensed_contig_33723	.	+
TDU_consensed_contig_38988	0	2387	TDU_consensed_contig_38988,TPO_consensed_contig_10289	.	+
TDU_consensed_contig_38991	11	1483	TDU_consensed_contig_38991,TPO_consensed_contig_85371	.	+
TDU_consensed_contig_38992	13	2222	TDU_consensed_contig_38992,TPO_consensed_contig_39676	.	+
TDU_consensed_contig_38993	98	2118	TDU_consensed_contig_38993,TPO_consensed_contig_97140	.	+
TDU_consensed_contig_38994	1	2367	TDU_consensed_contig_38994,TPO_consensed_contig_116007	.	+
TDU_consensed_contig_38997	1	1337	TDU_consensed_contig_38997,TPO_consensed_contig_18997	.	+
TDU_consensed_contig_39001	9	2189	TDU_consensed_contig_39001,TPO_consensed_contig_8869	.	+
TDU_consensed_contig_39004	40	729	TDU_consensed_contig_39004,TPO_consensed_contig_35380	.	+
TDU_consensed_contig_39006	5	829	TDU_consensed_contig_39006,TPO_consensed_contig_17892	.	+
TDU_consensed_contig_39008	0	1864	TDU_consensed_contig_39008,TPO_consensed_contig_19215	.	+
TDU_consensed_contig_39009	33	1998	TDU_consensed_contig_39009,TPO_consensed_contig_19213	.	+
TDU_consensed_contig_39012	71	900	TDU_consensed_contig_39012,TPO_consensed_contig_46232	.	+
TDU_consensed_contig_39015	0	579	TDU_consensed_contig_39015,TPO_consensed_contig_89425	.	+
TDU_consensed_contig_39019	7	1492	TDU_consensed_contig_39019,TPO_consensed_contig_16094	.	+
TDU_consensed_contig_39022	129	1735	TDU_consensed_contig_39022,TPO_consensed_contig_97050	.	+
TDU_consensed_contig_39026	70	1631	TDU_consensed_contig_39026,TPO_consensed_contig_35715	.	+
TDU_consensed_contig_39027	50	1118	TDU_consensed_contig_39027,TPO_consensed_contig_27978	.	+
TDU_consensed_contig_39034	0	823	TDU_consensed_contig_39034,TPO_consensed_contig_24593	.	+
TDU_consensed_contig_39036	26	980	TDU_consensed_contig_39036,TPO_consensed_contig_102451	.	+
TDU_consensed_contig_39037	73	2091	TDU_consensed_contig_39037,TPO_consensed_contig_38966	.	+
TDU_consensed_contig_39039	209	767	TDU_consensed_contig_39039,TPO_consensed_contig_37735	.	+
TDU_consensed_contig_39043	0	510	TDU_consensed_contig_39043,TPO_consensed_contig_39959	.	+
TDU_consensed_contig_39046	0	697	TDU_consensed_contig_39046,TPO_consensed_contig_3911	.	+
TDU_consensed_contig_39048	132	1217	TDU_consensed_contig_39048,TPO_consensed_contig_43551	.	+
TDU_consensed_contig_39050	5	1660	TDU_consensed_contig_39050,TPO_consensed_contig_40667	.	+
TDU_consensed_contig_39053	76	1085	TDU_consensed_contig_39053,TPO_consensed_contig_33460	.	+
TDU_consensed_contig_39054	501	1187	TDU_consensed_contig_39054,TPO_consensed_contig_13145	.	+
TDU_consensed_contig_39055	36	781	TDU_consensed_contig_39055,TPO_consensed_contig_27495	.	+
TDU_consensed_contig_39059	169	2481	TDU_consensed_contig_39059,TPO_consensed_contig_83788	.	+
TDU_consensed_contig_39063	47	1125	TDU_consensed_contig_39063,TPO_consensed_contig_16535	.	+
TDU_consensed_contig_39064	36	759	TDU_consensed_contig_39064,TPO_consensed_contig_40542	.	+
TDU_consensed_contig_39066	46	5746	TDU_consensed_contig_39066,TPO_consensed_contig_40857	.	+
TDU_consensed_contig_39070	40	1062	TDU_consensed_contig_39070,TPO_consensed_contig_48764	.	+
TDU_consensed_contig_39071	0	1181	TDU_consensed_contig_39071,TPO_consensed_contig_35837	.	+
TDU_consensed_contig_39074	0	638	TDU_consensed_contig_39074,TPO_consensed_contig_16885	.	+
TDU_consensed_contig_39075	0	1486	TDU_consensed_contig_39075,TPO_consensed_contig_96223	.	+
TDU_consensed_contig_39078	18	2584	TDU_consensed_contig_39078,TPO_consensed_contig_39116	.	+
TDU_consensed_contig_39079	18	1789	TDU_consensed_contig_39079,TPO_consensed_contig_39115	.	+
TDU_consensed_contig_39080	258	1266	TDU_consensed_contig_39080,TPO_consensed_contig_35707	.	+
TDU_consensed_contig_39081	9	793	TDU_consensed_contig_39081,TPO_consensed_contig_13097	.	+
TDU_consensed_contig_39084	124	1862	TDU_consensed_contig_39084,TPO_consensed_contig_37765	.	+
TDU_consensed_contig_39085	66	1392	TDU_consensed_contig_39085,TPO_consensed_contig_16866	.	+
TDU_consensed_contig_39086	25	3061	TDU_consensed_contig_39086,TPO_consensed_contig_8730	.	+
TDU_consensed_contig_39091	0	1403	TDU_consensed_contig_39091,TPO_consensed_contig_44688	.	+
TDU_consensed_contig_39094	12	650	TDU_consensed_contig_39094,TPO_consensed_contig_40417	.	+
TDU_consensed_contig_39096	136	2120	TDU_consensed_contig_39096,TPO_consensed_contig_96946	.	+
TDU_consensed_contig_39097	1	1112	TDU_consensed_contig_39097,TPO_consensed_contig_98957	.	+
TDU_consensed_contig_39105	20	899	TDU_consensed_contig_39105,TPO_consensed_contig_96970	.	+
TDU_consensed_contig_39107	26	1430	TDU_consensed_contig_39107,TPO_consensed_contig_19856	.	+
TDU_consensed_contig_39108	1	1728	TDU_consensed_contig_39108,TPO_consensed_contig_85049	.	+
TDU_consensed_contig_39110	114	1786	TDU_consensed_contig_39110,TPO_consensed_contig_35316	.	+
TDU_consensed_contig_39114	13	1667	TDU_consensed_contig_39114,TPO_consensed_contig_16128	.	+
TDU_consensed_contig_39115	7	1768	TDU_consensed_contig_39115,TPO_consensed_contig_34590	.	+
TDU_consensed_contig_39119	0	682	TDU_consensed_contig_39119,TPO_consensed_contig_43084	.	+
TDU_consensed_contig_39121	0	692	TDU_consensed_contig_39121,TPO_consensed_contig_67477	.	+
TDU_consensed_contig_39123	25	763	TDU_consensed_contig_39123,TPO_consensed_contig_37330	.	+
TDU_consensed_contig_39125	63	963	TDU_consensed_contig_39125,TPO_consensed_contig_41095	.	+
TDU_consensed_contig_39139	0	2415	TDU_consensed_contig_39139,TPO_consensed_contig_94515	.	+
TDU_consensed_contig_39142	29	2172	TDU_consensed_contig_39142,TPO_consensed_contig_106629	.	+
TDU_consensed_contig_39143	462	1732	TDU_consensed_contig_39143,TPO_consensed_contig_44518	.	+
TDU_consensed_contig_39144	0	1081	TDU_consensed_contig_39144,TPO_consensed_contig_44520	.	+
TDU_consensed_contig_39148	46	1088	TDU_consensed_contig_39148,TPO_consensed_contig_105221	.	+
TDU_consensed_contig_39149	0	1423	TDU_consensed_contig_39149,TPO_consensed_contig_38517	.	+
TDU_consensed_contig_39151	4	605	TDU_consensed_contig_39151,TPO_consensed_contig_70908	.	+
TDU_consensed_contig_39152	0	1553	TDU_consensed_contig_39152,TPO_consensed_contig_45735	.	+
TDU_consensed_contig_39155	37	2701	TDU_consensed_contig_39155,TPO_consensed_contig_16509	.	+
TDU_consensed_contig_39156	36	1212	TDU_consensed_contig_39156,TPO_consensed_contig_35495	.	+
TDU_consensed_contig_39157	162	2376	TDU_consensed_contig_39157,TPO_consensed_contig_83165	.	+
TDU_consensed_contig_39158	60	1427	TDU_consensed_contig_39158,TPO_consensed_contig_100944	.	+
TDU_consensed_contig_39159	141	947	TDU_consensed_contig_39159,TPO_consensed_contig_36649	.	+
TDU_consensed_contig_39160	5	2506	TDU_consensed_contig_39160,TPO_consensed_contig_96335	.	+
TDU_consensed_contig_39161	1	1311	TDU_consensed_contig_39161,TPO_consensed_contig_100205	.	+
TDU_consensed_contig_39163	91	1427	TDU_consensed_contig_39163,TPO_consensed_contig_13232	.	+
TDU_consensed_contig_39165	545	1466	TDU_consensed_contig_39165,TPO_consensed_contig_97567	.	+
TDU_consensed_contig_39167	57	892	TDU_consensed_contig_39167,TPO_consensed_contig_73151	.	+
TDU_consensed_contig_39169	5	2440	TDU_consensed_contig_39169,TPO_consensed_contig_35869	.	+
TDU_consensed_contig_39170	1	627	TDU_consensed_contig_39170,TPO_consensed_contig_40530	.	+
TDU_consensed_contig_39172	23	2471	TDU_consensed_contig_39172,TPO_consensed_contig_40498	.	+
TDU_consensed_contig_39174	130	1791	TDU_consensed_contig_39174,TPO_consensed_contig_2936	.	+
TDU_consensed_contig_39175	15	3490	TDU_consensed_contig_39175,TPO_consensed_contig_37341	.	+
TDU_consensed_contig_39176	76	1485	TDU_consensed_contig_39176,TPO_consensed_contig_11592	.	+
TDU_consensed_contig_39177	0	1143	TDU_consensed_contig_39177,TPO_consensed_contig_97237	.	+
TDU_consensed_contig_39182	589	1212	TDU_consensed_contig_39182,TPO_consensed_contig_104055	.	+
TDU_consensed_contig_39185	0	670	TDU_consensed_contig_39185,TPO_consensed_contig_4077	.	+
TDU_consensed_contig_39186	0	615	TDU_consensed_contig_39186,TPO_consensed_contig_8169	.	+
TDU_consensed_contig_39188	73	1755	TDU_consensed_contig_39188,TPO_consensed_contig_97636	.	+
TDU_consensed_contig_39189	0	539	TDU_consensed_contig_39189,TPO_consensed_contig_73675	.	+
TDU_consensed_contig_39192	0	6645	TDU_consensed_contig_39192,TPO_consensed_contig_35705	.	+
TDU_consensed_contig_39195	92	1694	TDU_consensed_contig_39195,TPO_consensed_contig_11750	.	+
TDU_consensed_contig_39199	18	572	TDU_consensed_contig_39199,TPO_consensed_contig_36448	.	+
TDU_consensed_contig_39207	57	2034	TDU_consensed_contig_39207,TPO_consensed_contig_106973	.	+
TDU_consensed_contig_39208	5	1676	TDU_consensed_contig_39208,TPO_consensed_contig_35079	.	+
TDU_consensed_contig_39209	21	1626	TDU_consensed_contig_39209,TPO_consensed_contig_37135	.	+
TDU_consensed_contig_39210	0	2660	TDU_consensed_contig_39210,TPO_consensed_contig_38727	.	+
TDU_consensed_contig_39211	37	1560	TDU_consensed_contig_39211,TPO_consensed_contig_46844	.	+
TDU_consensed_contig_39212	1	672	TDU_consensed_contig_39212,TPO_consensed_contig_42208	.	+
TDU_consensed_contig_39217	1	791	TDU_consensed_contig_39217,TPO_consensed_contig_51255	.	+
TDU_consensed_contig_39218	36	1144	TDU_consensed_contig_39218,TPO_consensed_contig_21169	.	+
TDU_consensed_contig_39219	59	1476	TDU_consensed_contig_39219,TPO_consensed_contig_16194	.	+
TDU_consensed_contig_39220	22	1560	TDU_consensed_contig_39220,TPO_consensed_contig_18699	.	+
TDU_consensed_contig_39225	1	2944	TDU_consensed_contig_39225,TPO_consensed_contig_40468	.	+
TDU_consensed_contig_39227	0	1358	TDU_consensed_contig_39227,TPO_consensed_contig_105888	.	+
TDU_consensed_contig_39228	20	2401	TDU_consensed_contig_39228,TPO_consensed_contig_106820	.	+
TDU_consensed_contig_39230	60	1081	TDU_consensed_contig_39230,TPO_consensed_contig_27823	.	+
TDU_consensed_contig_39233	1	1624	TDU_consensed_contig_39233,TPO_consensed_contig_37258	.	+
TDU_consensed_contig_39234	5	1024	TDU_consensed_contig_39234,TPO_consensed_contig_35258	.	+
TDU_consensed_contig_39235	109	1395	TDU_consensed_contig_39235,TPO_consensed_contig_16663	.	+
TDU_consensed_contig_39237	7	2009	TDU_consensed_contig_39237,TPO_consensed_contig_27583	.	+
TDU_consensed_contig_39242	6	1171	TDU_consensed_contig_39242,TPO_consensed_contig_6810	.	+
TDU_consensed_contig_39245	0	856	TDU_consensed_contig_39245,TPO_consensed_contig_38655	.	+
TDU_consensed_contig_39248	0	3246	TDU_consensed_contig_39248,TPO_consensed_contig_4395	.	+
TDU_consensed_contig_39250	45	811	TDU_consensed_contig_39250,TPO_consensed_contig_46953	.	+
TDU_consensed_contig_39251	27	2023	TDU_consensed_contig_39251,TPO_consensed_contig_16207	.	+
TDU_consensed_contig_39253	0	1521	TDU_consensed_contig_39253,TPO_consensed_contig_41086	.	+
TDU_consensed_contig_39257	0	1366	TDU_consensed_contig_39257,TPO_consensed_contig_9396	.	+
TDU_consensed_contig_39258	0	924	TDU_consensed_contig_39258,TPO_consensed_contig_110668	.	+
TDU_consensed_contig_39261	0	1271	TDU_consensed_contig_39261,TPO_consensed_contig_39244	.	+
TDU_consensed_contig_39262	21	2106	TDU_consensed_contig_39262,TPO_consensed_contig_8740	.	+
TDU_consensed_contig_39263	6	1948	TDU_consensed_contig_39263,TPO_consensed_contig_40382	.	+
TDU_consensed_contig_39266	157	1664	TDU_consensed_contig_39266,TPO_consensed_contig_16669	.	+
TDU_consensed_contig_39267	147	1584	TDU_consensed_contig_39267,TPO_consensed_contig_105283	.	+
TDU_consensed_contig_39270	28	1142	TDU_consensed_contig_39270,TPO_consensed_contig_40309	.	+
TDU_consensed_contig_39271	75	1089	TDU_consensed_contig_39271,TPO_consensed_contig_98869	.	+
TDU_consensed_contig_39277	0	1233	TDU_consensed_contig_39277,TPO_consensed_contig_59338	.	+
TDU_consensed_contig_39280	10	3071	TDU_consensed_contig_39280,TPO_consensed_contig_97540	.	+
TDU_consensed_contig_39282	0	1219	TDU_consensed_contig_39282,TPO_consensed_contig_13209	.	+
TDU_consensed_contig_39285	32	1597	TDU_consensed_contig_39285,TPO_consensed_contig_35170	.	+
TDU_consensed_contig_39286	25	728	TDU_consensed_contig_39286,TPO_consensed_contig_46623	.	+
TDU_consensed_contig_39287	0	980	TDU_consensed_contig_39287,TPO_consensed_contig_19697	.	+
TDU_consensed_contig_39288	0	1088	TDU_consensed_contig_39288,TPO_consensed_contig_102522	.	+
TDU_consensed_contig_39291	0	1407	TDU_consensed_contig_39291,TPO_consensed_contig_13323	.	+
TDU_consensed_contig_39293	0	1609	TDU_consensed_contig_39293,TPO_consensed_contig_33684	.	+
TDU_consensed_contig_39301	21	2114	TDU_consensed_contig_39301,TPO_consensed_contig_11451	.	+
TDU_consensed_contig_39303	0	610	TDU_consensed_contig_39303,TPO_consensed_contig_27938	.	+
TDU_consensed_contig_39310	30	1052	TDU_consensed_contig_39310,TPO_consensed_contig_18704	.	+
TDU_consensed_contig_39313	19	2158	TDU_consensed_contig_39313,TPO_consensed_contig_17486	.	+
TDU_consensed_contig_39314	1	1031	TDU_consensed_contig_39314,TPO_consensed_contig_98166	.	+
TDU_consensed_contig_39315	1	1636	TDU_consensed_contig_39315,TPO_consensed_contig_36548	.	+
TDU_consensed_contig_39316	30	1747	TDU_consensed_contig_39316,TPO_consensed_contig_32468	.	+
TDU_consensed_contig_39320	20	3165	TDU_consensed_contig_39320,TPO_consensed_contig_110449	.	+
TDU_consensed_contig_39326	6	2325	TDU_consensed_contig_39326,TPO_consensed_contig_34998	.	+
TDU_consensed_contig_39328	5	1147	TDU_consensed_contig_39328,TPO_consensed_contig_96071	.	+
TDU_consensed_contig_39329	11	1138	TDU_consensed_contig_39329,TPO_consensed_contig_34115	.	+
TDU_consensed_contig_39331	0	5260	TDU_consensed_contig_39331,TPO_consensed_contig_39368	.	+
TDU_consensed_contig_39333	52	1496	TDU_consensed_contig_39333,TPO_consensed_contig_35908	.	+
TDU_consensed_contig_39334	52	1566	TDU_consensed_contig_39334,TPO_consensed_contig_35909	.	+
TDU_consensed_contig_39337	0	1342	TDU_consensed_contig_39337,TPO_consensed_contig_72099	.	+
TDU_consensed_contig_39339	108	2039	TDU_consensed_contig_39339,TPO_consensed_contig_10168	.	+
TDU_consensed_contig_39342	0	1867	TDU_consensed_contig_39342,TPO_consensed_contig_104223	.	+
TDU_consensed_contig_39346	37	1806	TDU_consensed_contig_39346,TPO_consensed_contig_28248	.	+
TDU_consensed_contig_39347	1	1652	TDU_consensed_contig_39347,TPO_consensed_contig_67183	.	+
TDU_consensed_contig_39349	9	988	TDU_consensed_contig_39349,TPO_consensed_contig_85156	.	+
TDU_consensed_contig_39357	9	773	TDU_consensed_contig_39357,TPO_consensed_contig_12888	.	+
TDU_consensed_contig_39359	2	1037	TDU_consensed_contig_39359,TPO_consensed_contig_58730	.	+
TDU_consensed_contig_39360	0	790	TDU_consensed_contig_39360,TPO_consensed_contig_116683	.	+
TDU_consensed_contig_39363	861	1407	TDU_consensed_contig_39363,TPO_consensed_contig_105911	.	+
TDU_consensed_contig_39364	0	948	TDU_consensed_contig_39364,TPO_consensed_contig_88687	.	+
TDU_consensed_contig_39367	29	825	TDU_consensed_contig_39367,TPO_consensed_contig_102697	.	+
TDU_consensed_contig_39368	8	1986	TDU_consensed_contig_39368,TPO_consensed_contig_80878	.	+
TDU_consensed_contig_39373	0	1776	TDU_consensed_contig_39373,TPO_consensed_contig_110312	.	+
TDU_consensed_contig_39374	0	1994	TDU_consensed_contig_39374,TPO_consensed_contig_17696	.	+
TDU_consensed_contig_39378	166	1230	TDU_consensed_contig_39378,TPO_consensed_contig_37976	.	+
TDU_consensed_contig_39379	0	1359	TDU_consensed_contig_39379,TPO_consensed_contig_39716	.	+
TDU_consensed_contig_39382	170	728	TDU_consensed_contig_39382,TPO_consensed_contig_100844	.	+
TDU_consensed_contig_39384	0	940	TDU_consensed_contig_39384,TPO_consensed_contig_43520	.	+
TDU_consensed_contig_39385	62	1534	TDU_consensed_contig_39385,TPO_consensed_contig_114002	.	+
TDU_consensed_contig_39386	0	2887	TDU_consensed_contig_39386,TPO_consensed_contig_65778	.	+
TDU_consensed_contig_39388	1	3636	TDU_consensed_contig_39388,TPO_consensed_contig_106099	.	+
TDU_consensed_contig_39389	1	3663	TDU_consensed_contig_39389,TPO_consensed_contig_39373	.	+
TDU_consensed_contig_39391	19	616	TDU_consensed_contig_39391,TPO_consensed_contig_57159	.	+
TDU_consensed_contig_39396	49	1229	TDU_consensed_contig_39396,TPO_consensed_contig_33375	.	+
TDU_consensed_contig_39398	0	1436	TDU_consensed_contig_39398,TPO_consensed_contig_84676	.	+
TDU_consensed_contig_39402	88	772	TDU_consensed_contig_39402,TPO_consensed_contig_33008	.	+
TDU_consensed_contig_39404	1	999	TDU_consensed_contig_39404,TPO_consensed_contig_90953	.	+
TDU_consensed_contig_39405	1	1843	TDU_consensed_contig_39405,TPO_consensed_contig_71364	.	+
TDU_consensed_contig_39408	4	813	TDU_consensed_contig_39408,TPO_consensed_contig_98927	.	+
TDU_consensed_contig_39410	0	1358	TDU_consensed_contig_39410,TPO_consensed_contig_73434	.	+
TDU_consensed_contig_39414	91	1219	TDU_consensed_contig_39414,TPO_consensed_contig_34125	.	+
TDU_consensed_contig_39415	21	1877	TDU_consensed_contig_39415,TPO_consensed_contig_20159	.	+
TDU_consensed_contig_39417	11	1476	TDU_consensed_contig_39417,TPO_consensed_contig_20161	.	+
TDU_consensed_contig_39419	383	1041	TDU_consensed_contig_39419,TPO_consensed_contig_85642	.	+
TDU_consensed_contig_39424	0	1514	TDU_consensed_contig_39424,TPO_consensed_contig_116019	.	+
TDU_consensed_contig_39425	91	1247	TDU_consensed_contig_39425,TPO_consensed_contig_88858	.	+
TDU_consensed_contig_39426	0	1453	TDU_consensed_contig_39426,TPO_consensed_contig_32256	.	+
TDU_consensed_contig_39427	71	2640	TDU_consensed_contig_39427,TPO_consensed_contig_62092	.	+
TDU_consensed_contig_39431	0	571	TDU_consensed_contig_39431,TPO_consensed_contig_40167	.	+
TDU_consensed_contig_39436	0	1613	TDU_consensed_contig_39436,TPO_consensed_contig_96275	.	+
TDU_consensed_contig_39437	0	1686	TDU_consensed_contig_39437,TPO_consensed_contig_101647	.	+
TDU_consensed_contig_39438	0	2450	TDU_consensed_contig_39438,TPO_consensed_contig_9380	.	+
TDU_consensed_contig_39439	0	4041	TDU_consensed_contig_39439,TPO_consensed_contig_103969	.	+
TDU_consensed_contig_39440	0	846	TDU_consensed_contig_39440,TPO_consensed_contig_16446	.	+
TDU_consensed_contig_39441	1	5352	TDU_consensed_contig_39441,TPO_consensed_contig_12050	.	+
TDU_consensed_contig_39442	0	1658	TDU_consensed_contig_39442,TPO_consensed_contig_111439	.	+
TDU_consensed_contig_39443	8	1925	TDU_consensed_contig_39443,TPO_consensed_contig_32609	.	+
TDU_consensed_contig_39445	137	911	TDU_consensed_contig_39445,TPO_consensed_contig_28005	.	+
TDU_consensed_contig_39447	4	1451	TDU_consensed_contig_39447,TPO_consensed_contig_16454	.	+
TDU_consensed_contig_39448	4	868	TDU_consensed_contig_39448,TPO_consensed_contig_84992	.	+
TDU_consensed_contig_39449	94	641	TDU_consensed_contig_39449,TPO_consensed_contig_57769	.	+
TDU_consensed_contig_39450	0	975	TDU_consensed_contig_39450,TPO_consensed_contig_9929	.	+
TDU_consensed_contig_39454	44	1769	TDU_consensed_contig_39454,TPO_consensed_contig_13293	.	+
TDU_consensed_contig_39460	3582	4212	TDU_consensed_contig_39460,TPO_consensed_contig_60236	.	+
TDU_consensed_contig_39466	3	1599	TDU_consensed_contig_39466,TPO_consensed_contig_71702	.	+
TDU_consensed_contig_39471	23	1377	TDU_consensed_contig_39471,TPO_consensed_contig_41076	.	+
TDU_consensed_contig_39473	0	1833	TDU_consensed_contig_39473,TPO_consensed_contig_69581	.	+
TDU_consensed_contig_39475	9	1605	TDU_consensed_contig_39475,TPO_consensed_contig_19849	.	+
TDU_consensed_contig_39476	1	2116	TDU_consensed_contig_39476,TPO_consensed_contig_59242	.	+
TDU_consensed_contig_39489	0	1393	TDU_consensed_contig_39489,TPO_consensed_contig_16527	.	+
TDU_consensed_contig_39492	0	1392	TDU_consensed_contig_39492,TPO_consensed_contig_96205	.	+
TDU_consensed_contig_39494	0	729	TDU_consensed_contig_39494,TPO_consensed_contig_42934	.	+
TDU_consensed_contig_39499	46	1415	TDU_consensed_contig_39499,TPO_consensed_contig_33240	.	+
TDU_consensed_contig_39501	10	2499	TDU_consensed_contig_39501,TPO_consensed_contig_37474	.	+
TDU_consensed_contig_39503	16	2199	TDU_consensed_contig_39503,TPO_consensed_contig_10178	.	+
TDU_consensed_contig_39506	6	1112	TDU_consensed_contig_39506,TPO_consensed_contig_84425	.	+
TDU_consensed_contig_39510	0	1023	TDU_consensed_contig_39510,TPO_consensed_contig_91378	.	+
TDU_consensed_contig_39516	0	570	TDU_consensed_contig_39516,TPO_consensed_contig_42256	.	+
TDU_consensed_contig_39518	151	2382	TDU_consensed_contig_39518,TPO_consensed_contig_96969	.	+
TDU_consensed_contig_39521	0	1687	TDU_consensed_contig_39521,TPO_consensed_contig_13006	.	+
TDU_consensed_contig_39522	1	1139	TDU_consensed_contig_39522,TPO_consensed_contig_37799	.	+
TDU_consensed_contig_39531	351	2204	TDU_consensed_contig_39531,TPO_consensed_contig_32444	.	+
TDU_consensed_contig_39532	351	2127	TDU_consensed_contig_39532,TPO_consensed_contig_32445	.	+
TDU_consensed_contig_39534	0	671	TDU_consensed_contig_39534,TPO_consensed_contig_71015	.	+
TDU_consensed_contig_39538	0	812	TDU_consensed_contig_39538,TPO_consensed_contig_102532	.	+
TDU_consensed_contig_39540	0	1680	TDU_consensed_contig_39540,TPO_consensed_contig_46338	.	+
TDU_consensed_contig_39541	37	1755	TDU_consensed_contig_39541,TPO_consensed_contig_97029	.	+
TDU_consensed_contig_39542	0	2608	TDU_consensed_contig_39542,TPO_consensed_contig_25162	.	+
TDU_consensed_contig_39543	0	2017	TDU_consensed_contig_39543,TPO_consensed_contig_8685	.	+
TDU_consensed_contig_39545	4	630	TDU_consensed_contig_39545,TPO_consensed_contig_37515	.	+
TDU_consensed_contig_39547	1379	1914	TDU_consensed_contig_39547,TPO_consensed_contig_50123	.	+
TDU_consensed_contig_39555	15	2657	TDU_consensed_contig_39555,TPO_consensed_contig_94729	.	+
TDU_consensed_contig_39557	249	1682	TDU_consensed_contig_39557,TPO_consensed_contig_16762	.	+
TDU_consensed_contig_39559	10	565	TDU_consensed_contig_39559,TPO_consensed_contig_97206	.	+
TDU_consensed_contig_39560	10	720	TDU_consensed_contig_39560,TPO_consensed_contig_105756	.	+
TDU_consensed_contig_39561	7	3650	TDU_consensed_contig_39561,TPO_consensed_contig_38812	.	+
TDU_consensed_contig_39563	49	1486	TDU_consensed_contig_39563,TPO_consensed_contig_16292	.	+
TDU_consensed_contig_39564	1	1407	TDU_consensed_contig_39564,TPO_consensed_contig_46242	.	+
TDU_consensed_contig_39565	88	3050	TDU_consensed_contig_39565,TPO_consensed_contig_41707	.	+
TDU_consensed_contig_39569	25	3281	TDU_consensed_contig_39569,TPO_consensed_contig_39791	.	+
TDU_consensed_contig_39571	25	3336	TDU_consensed_contig_39571,TPO_consensed_contig_39792	.	+
TDU_consensed_contig_39572	0	1966	TDU_consensed_contig_39572,TPO_consensed_contig_33111	.	+
TDU_consensed_contig_39576	0	2229	TDU_consensed_contig_39576,TPO_consensed_contig_41871	.	+
TDU_consensed_contig_39577	7	2835	TDU_consensed_contig_39577,TPO_consensed_contig_112925	.	+
TDU_consensed_contig_39579	0	1033	TDU_consensed_contig_39579,TPO_consensed_contig_57212	.	+
TDU_consensed_contig_39583	54	2704	TDU_consensed_contig_39583,TPO_consensed_contig_10720	.	+
TDU_consensed_contig_39584	1	997	TDU_consensed_contig_39584,TPO_consensed_contig_39541	.	+
TDU_consensed_contig_39588	12	1104	TDU_consensed_contig_39588,TPO_consensed_contig_64258	.	+
TDU_consensed_contig_39589	123	3247	TDU_consensed_contig_39589,TPO_consensed_contig_97776	.	+
TDU_consensed_contig_39590	7	3316	TDU_consensed_contig_39590,TPO_consensed_contig_32825	.	+
TDU_consensed_contig_39591	5	1855	TDU_consensed_contig_39591,TPO_consensed_contig_33056	.	+
TDU_consensed_contig_39601	13	607	TDU_consensed_contig_39601,TPO_consensed_contig_39405	.	+
TDU_consensed_contig_39603	64	1084	TDU_consensed_contig_39603,TPO_consensed_contig_35948	.	+
TDU_consensed_contig_39605	19	984	TDU_consensed_contig_39605,TPO_consensed_contig_73593	.	+
TDU_consensed_contig_39612	0	4088	TDU_consensed_contig_39612,TPO_consensed_contig_83821	.	+
TDU_consensed_contig_39614	38	1943	TDU_consensed_contig_39614,TPO_consensed_contig_87819	.	+
TDU_consensed_contig_39617	63	2982	TDU_consensed_contig_39617,TPO_consensed_contig_38629	.	+
TDU_consensed_contig_39618	0	1045	TDU_consensed_contig_39618,TPO_consensed_contig_18527	.	+
TDU_consensed_contig_39619	1	562	TDU_consensed_contig_39619,TPO_consensed_contig_58449	.	+
TDU_consensed_contig_39620	22	554	TDU_consensed_contig_39620,TPO_consensed_contig_112914	.	+
TDU_consensed_contig_39622	0	1096	TDU_consensed_contig_39622,TPO_consensed_contig_27661	.	+
TDU_consensed_contig_39627	39	1124	TDU_consensed_contig_39627,TPO_consensed_contig_23772	.	+
TDU_consensed_contig_39629	0	3690	TDU_consensed_contig_39629,TPO_consensed_contig_41449	.	+
TDU_consensed_contig_39630	0	621	TDU_consensed_contig_39630,TPO_consensed_contig_46782	.	+
TDU_consensed_contig_39631	0	1063	TDU_consensed_contig_39631,TPO_consensed_contig_42175	.	+
TDU_consensed_contig_39632	0	994	TDU_consensed_contig_39632,TPO_consensed_contig_73390	.	+
TDU_consensed_contig_39633	280	2111	TDU_consensed_contig_39633,TPO_consensed_contig_46501	.	+
TDU_consensed_contig_39634	2	1965	TDU_consensed_contig_39634,TPO_consensed_contig_58999	.	+
TDU_consensed_contig_39636	48	4025	TDU_consensed_contig_39636,TPO_consensed_contig_83694	.	+
TDU_consensed_contig_39637	38	794	TDU_consensed_contig_39637,TPO_consensed_contig_12413	.	+
TDU_consensed_contig_39638	2	1075	TDU_consensed_contig_39638,TPO_consensed_contig_26385	.	+
TDU_consensed_contig_39644	283	1279	TDU_consensed_contig_39644,TPO_consensed_contig_16877	.	+
TDU_consensed_contig_39645	441	1186	TDU_consensed_contig_39645,TPO_consensed_contig_97253	.	+
TDU_consensed_contig_39646	441	1079	TDU_consensed_contig_39646,TPO_consensed_contig_105949	.	+
TDU_consensed_contig_39647	131	1119	TDU_consensed_contig_39647,TPO_consensed_contig_116042	.	+
TDU_consensed_contig_39648	131	1012	TDU_consensed_contig_39648,TPO_consensed_contig_105950	.	+
TDU_consensed_contig_39649	25	1883	TDU_consensed_contig_39649,TPO_consensed_contig_37086	.	+
TDU_consensed_contig_39651	46	1976	TDU_consensed_contig_39651,TPO_consensed_contig_37264	.	+
TDU_consensed_contig_39652	13	695	TDU_consensed_contig_39652,TPO_consensed_contig_89292	.	+
TDU_consensed_contig_39654	1	1545	TDU_consensed_contig_39654,TPO_consensed_contig_58839	.	+
TDU_consensed_contig_39655	1	1553	TDU_consensed_contig_39655,TPO_consensed_contig_116100	.	+
TDU_consensed_contig_39657	29	1940	TDU_consensed_contig_39657,TPO_consensed_contig_69565	.	+
TDU_consensed_contig_39659	0	2184	TDU_consensed_contig_39659,TPO_consensed_contig_38405	.	+
TDU_consensed_contig_39660	1	2880	TDU_consensed_contig_39660,TPO_consensed_contig_33398	.	+
TDU_consensed_contig_39662	0	1177	TDU_consensed_contig_39662,TPO_consensed_contig_40185	.	+
TDU_consensed_contig_39665	6	3407	TDU_consensed_contig_39665,TPO_consensed_contig_17556	.	+
TDU_consensed_contig_39670	48	632	TDU_consensed_contig_39670,TPO_consensed_contig_103100	.	+
TDU_consensed_contig_39671	896	1746	TDU_consensed_contig_39671,TPO_consensed_contig_47430	.	+
TDU_consensed_contig_39675	9	2454	TDU_consensed_contig_39675,TPO_consensed_contig_6251	.	+
TDU_consensed_contig_39688	153	2212	TDU_consensed_contig_39688,TPO_consensed_contig_32212	.	+
TDU_consensed_contig_39689	93	1744	TDU_consensed_contig_39689,TPO_consensed_contig_105438	.	+
TDU_consensed_contig_39690	0	1538	TDU_consensed_contig_39690,TPO_consensed_contig_36319	.	+
TDU_consensed_contig_39691	0	1564	TDU_consensed_contig_39691,TPO_consensed_contig_3116	.	+
TDU_consensed_contig_39696	1606	2645	TDU_consensed_contig_39696,TPO_consensed_contig_43572	.	+
TDU_consensed_contig_39697	5	2707	TDU_consensed_contig_39697,TPO_consensed_contig_43653	.	+
TDU_consensed_contig_39700	0	1061	TDU_consensed_contig_39700,TPO_consensed_contig_40852	.	+
TDU_consensed_contig_39701	0	1656	TDU_consensed_contig_39701,TPO_consensed_contig_106147	.	+
TDU_consensed_contig_39702	104	1394	TDU_consensed_contig_39702,TPO_consensed_contig_18210	.	+
TDU_consensed_contig_39705	2	2489	TDU_consensed_contig_39705,TPO_consensed_contig_38386	.	+
TDU_consensed_contig_39708	4	758	TDU_consensed_contig_39708,TPO_consensed_contig_73331	.	+
TDU_consensed_contig_39709	29	959	TDU_consensed_contig_39709,TPO_consensed_contig_105423	.	+
TDU_consensed_contig_39714	75	1008	TDU_consensed_contig_39714,TPO_consensed_contig_27423	.	+
TDU_consensed_contig_39715	2	1405	TDU_consensed_contig_39715,TPO_consensed_contig_32662	.	+
TDU_consensed_contig_39718	0	1628	TDU_consensed_contig_39718,TPO_consensed_contig_35396	.	+
TDU_consensed_contig_39719	158	1760	TDU_consensed_contig_39719,TPO_consensed_contig_38898	.	+
TDU_consensed_contig_39723	137	2195	TDU_consensed_contig_39723,TPO_consensed_contig_32667	.	+
TDU_consensed_contig_39731	1	1027	TDU_consensed_contig_39731,TPO_consensed_contig_16833	.	+
TDU_consensed_contig_39734	1	1450	TDU_consensed_contig_39734,TPO_consensed_contig_34903	.	+
TDU_consensed_contig_39737	337	2088	TDU_consensed_contig_39737,TPO_consensed_contig_103818	.	+
TDU_consensed_contig_39740	5	931	TDU_consensed_contig_39740,TPO_consensed_contig_27047	.	+
TDU_consensed_contig_39741	5	863	TDU_consensed_contig_39741,TPO_consensed_contig_27042	.	+
TDU_consensed_contig_39742	319	1871	TDU_consensed_contig_39742,TPO_consensed_contig_90734	.	+
TDU_consensed_contig_39743	321	1942	TDU_consensed_contig_39743,TPO_consensed_contig_18033	.	+
TDU_consensed_contig_39746	5	2673	TDU_consensed_contig_39746,TPO_consensed_contig_42024	.	+
TDU_consensed_contig_39747	0	1914	TDU_consensed_contig_39747,TPO_consensed_contig_38280	.	+
TDU_consensed_contig_39748	721	1657	TDU_consensed_contig_39748,TPO_consensed_contig_16412	.	+
TDU_consensed_contig_39753	0	1729	TDU_consensed_contig_39753,TPO_consensed_contig_19841	.	+
TDU_consensed_contig_39759	54	1162	TDU_consensed_contig_39759,TPO_consensed_contig_12740	.	+
TDU_consensed_contig_39760	13	587	TDU_consensed_contig_39760,TPO_consensed_contig_89172	.	+
TDU_consensed_contig_39765	5	1684	TDU_consensed_contig_39765,TPO_consensed_contig_43393	.	+
TDU_consensed_contig_39769	24	2236	TDU_consensed_contig_39769,TPO_consensed_contig_8551	.	+
TDU_consensed_contig_39774	0	1156	TDU_consensed_contig_39774,TPO_consensed_contig_9357	.	+
TDU_consensed_contig_39775	0	950	TDU_consensed_contig_39775,TPO_consensed_contig_109353	.	+
TDU_consensed_contig_39776	15	530	TDU_consensed_contig_39776,TPO_consensed_contig_39900	.	+
TDU_consensed_contig_39780	23	657	TDU_consensed_contig_39780,TPO_consensed_contig_34467	.	+
TDU_consensed_contig_39782	0	1889	TDU_consensed_contig_39782,TPO_consensed_contig_106649	.	+
TDU_consensed_contig_39787	27	1255	TDU_consensed_contig_39787,TPO_consensed_contig_69885	.	+
TDU_consensed_contig_39794	9	1148	TDU_consensed_contig_39794,TPO_consensed_contig_4977	.	+
TDU_consensed_contig_39804	12	1319	TDU_consensed_contig_39804,TPO_consensed_contig_116744	.	+
TDU_consensed_contig_39807	101	1519	TDU_consensed_contig_39807,TPO_consensed_contig_29813	.	+
TDU_consensed_contig_39810	22	2532	TDU_consensed_contig_39810,TPO_consensed_contig_35205	.	+
TDU_consensed_contig_39813	10	2409	TDU_consensed_contig_39813,TPO_consensed_contig_27678	.	+
TDU_consensed_contig_39814	237	1993	TDU_consensed_contig_39814,TPO_consensed_contig_17470	.	+
TDU_consensed_contig_39816	0	1583	TDU_consensed_contig_39816,TPO_consensed_contig_58281	.	+
TDU_consensed_contig_39817	0	1789	TDU_consensed_contig_39817,TPO_consensed_contig_37025	.	+
TDU_consensed_contig_39827	5	1542	TDU_consensed_contig_39827,TPO_consensed_contig_19121	.	+
TDU_consensed_contig_39831	26	651	TDU_consensed_contig_39831,TPO_consensed_contig_22932	.	+
TDU_consensed_contig_39833	186	1561	TDU_consensed_contig_39833,TPO_consensed_contig_103882	.	+
TDU_consensed_contig_39834	17	2395	TDU_consensed_contig_39834,TPO_consensed_contig_10975	.	+
TDU_consensed_contig_39840	21	1246	TDU_consensed_contig_39840,TPO_consensed_contig_35593	.	+
TDU_consensed_contig_39842	43	1457	TDU_consensed_contig_39842,TPO_consensed_contig_97005	.	+
TDU_consensed_contig_39844	3	1484	TDU_consensed_contig_39844,TPO_consensed_contig_18497	.	+
TDU_consensed_contig_39845	18	1385	TDU_consensed_contig_39845,TPO_consensed_contig_37136	.	+
TDU_consensed_contig_39853	20	2061	TDU_consensed_contig_39853,TPO_consensed_contig_39917	.	+
TDU_consensed_contig_39860	90	747	TDU_consensed_contig_39860,TPO_consensed_contig_37107	.	+
TDU_consensed_contig_39864	67	1757	TDU_consensed_contig_39864,TPO_consensed_contig_70730	.	+
TDU_consensed_contig_39865	67	1698	TDU_consensed_contig_39865,TPO_consensed_contig_70714	.	+
TDU_consensed_contig_39866	11	1367	TDU_consensed_contig_39866,TPO_consensed_contig_37129	.	+
TDU_consensed_contig_39867	10	4165	TDU_consensed_contig_39867,TPO_consensed_contig_16814	.	+
TDU_consensed_contig_39868	393	2108	TDU_consensed_contig_39868,TPO_consensed_contig_34085	.	+
TDU_consensed_contig_39877	64	1050	TDU_consensed_contig_39877,TPO_consensed_contig_72504	.	+
TDU_consensed_contig_39878	64	1237	TDU_consensed_contig_39878,TPO_consensed_contig_116549	.	+
TDU_consensed_contig_39879	64	717	TDU_consensed_contig_39879,TPO_consensed_contig_72505	.	+
TDU_consensed_contig_39881	63	2004	TDU_consensed_contig_39881,TPO_consensed_contig_73277	.	+
TDU_consensed_contig_39882	0	1344	TDU_consensed_contig_39882,TPO_consensed_contig_35533	.	+
TDU_consensed_contig_39883	39	2867	TDU_consensed_contig_39883,TPO_consensed_contig_26319	.	+
TDU_consensed_contig_39887	9	1000	TDU_consensed_contig_39887,TPO_consensed_contig_99060	.	+
TDU_consensed_contig_39889	43	3997	TDU_consensed_contig_39889,TPO_consensed_contig_38016	.	+
TDU_consensed_contig_39890	307	1568	TDU_consensed_contig_39890,TPO_consensed_contig_5623	.	+
TDU_consensed_contig_39891	35	803	TDU_consensed_contig_39891,TPO_consensed_contig_35873	.	+
TDU_consensed_contig_39893	6	1574	TDU_consensed_contig_39893,TPO_consensed_contig_9971	.	+
TDU_consensed_contig_39894	0	1792	TDU_consensed_contig_39894,TPO_consensed_contig_6732	.	+
TDU_consensed_contig_39896	5	1259	TDU_consensed_contig_39896,TPO_consensed_contig_96067	.	+
TDU_consensed_contig_39898	82	726	TDU_consensed_contig_39898,TPO_consensed_contig_51841	.	+
TDU_consensed_contig_39900	4	1883	TDU_consensed_contig_39900,TPO_consensed_contig_97495	.	+
TDU_consensed_contig_39901	44	1664	TDU_consensed_contig_39901,TPO_consensed_contig_38349	.	+
TDU_consensed_contig_39903	34	2980	TDU_consensed_contig_39903,TPO_consensed_contig_46448	.	+
TDU_consensed_contig_39906	83	3364	TDU_consensed_contig_39906,TPO_consensed_contig_9588	.	+
TDU_consensed_contig_39909	6	1635	TDU_consensed_contig_39909,TPO_consensed_contig_37597	.	+
TDU_consensed_contig_39911	135	1931	TDU_consensed_contig_39911,TPO_consensed_contig_35666	.	+
TDU_consensed_contig_39912	391	1256	TDU_consensed_contig_39912,TPO_consensed_contig_83599	.	+
TDU_consensed_contig_39913	31	934	TDU_consensed_contig_39913,TPO_consensed_contig_83600	.	+
TDU_consensed_contig_39915	8	1029	TDU_consensed_contig_39915,TPO_consensed_contig_12670	.	+
TDU_consensed_contig_39920	14	1447	TDU_consensed_contig_39920,TPO_consensed_contig_34533	.	+
TDU_consensed_contig_39922	22	2195	TDU_consensed_contig_39922,TPO_consensed_contig_44787	.	+
TDU_consensed_contig_39923	1	613	TDU_consensed_contig_39923,TPO_consensed_contig_28071	.	+
TDU_consensed_contig_39925	2	1784	TDU_consensed_contig_39925,TPO_consensed_contig_40236	.	+
TDU_consensed_contig_39926	2	1658	TDU_consensed_contig_39926,TPO_consensed_contig_59278	.	+
TDU_consensed_contig_39927	91	1848	TDU_consensed_contig_39927,TPO_consensed_contig_35508	.	+
TDU_consensed_contig_39928	0	1153	TDU_consensed_contig_39928,TPO_consensed_contig_58582	.	+
TDU_consensed_contig_39935	8	1767	TDU_consensed_contig_39935,TPO_consensed_contig_113760	.	+
TDU_consensed_contig_39939	256	1457	TDU_consensed_contig_39939,TPO_consensed_contig_107935	.	+
TDU_consensed_contig_39940	1	1683	TDU_consensed_contig_39940,TPO_consensed_contig_27649	.	+
TDU_consensed_contig_39941	113	1566	TDU_consensed_contig_39941,TPO_consensed_contig_35297	.	+
TDU_consensed_contig_39942	32	3455	TDU_consensed_contig_39942,TPO_consensed_contig_45775	.	+
TDU_consensed_contig_39943	125	1675	TDU_consensed_contig_39943,TPO_consensed_contig_35034	.	+
TDU_consensed_contig_39946	17	2123	TDU_consensed_contig_39946,TPO_consensed_contig_36130	.	+
TDU_consensed_contig_39949	54	1361	TDU_consensed_contig_39949,TPO_consensed_contig_63510	.	+
TDU_consensed_contig_39950	37	1878	TDU_consensed_contig_39950,TPO_consensed_contig_97671	.	+
TDU_consensed_contig_39958	81	2868	TDU_consensed_contig_39958,TPO_consensed_contig_17497	.	+
TDU_consensed_contig_39959	21	984	TDU_consensed_contig_39959,TPO_consensed_contig_106796	.	+
TDU_consensed_contig_39960	8	1304	TDU_consensed_contig_39960,TPO_consensed_contig_43992	.	+
TDU_consensed_contig_39961	15	3839	TDU_consensed_contig_39961,TPO_consensed_contig_18711	.	+
TDU_consensed_contig_39964	0	1117	TDU_consensed_contig_39964,TPO_consensed_contig_23327	.	+
TDU_consensed_contig_39967	6	1134	TDU_consensed_contig_39967,TPO_consensed_contig_106534	.	+
TDU_consensed_contig_39969	24	856	TDU_consensed_contig_39969,TPO_consensed_contig_27806	.	+
TDU_consensed_contig_39975	191	3808	TDU_consensed_contig_39975,TPO_consensed_contig_4605	.	+
TDU_consensed_contig_39976	0	622	TDU_consensed_contig_39976,TPO_consensed_contig_107269	.	+
TDU_consensed_contig_39977	0	1544	TDU_consensed_contig_39977,TPO_consensed_contig_40472	.	+
TDU_consensed_contig_39979	0	906	TDU_consensed_contig_39979,TPO_consensed_contig_5392	.	+
TDU_consensed_contig_39983	114	1459	TDU_consensed_contig_39983,TPO_consensed_contig_104064	.	+
TDU_consensed_contig_39986	73	2333	TDU_consensed_contig_39986,TPO_consensed_contig_35488	.	+
TDU_consensed_contig_39996	0	2221	TDU_consensed_contig_39996,TPO_consensed_contig_3881	.	+
TDU_consensed_contig_39997	8	1331	TDU_consensed_contig_39997,TPO_consensed_contig_33497	.	+
TDU_consensed_contig_39998	4	660	TDU_consensed_contig_39998,TPO_consensed_contig_71317	.	+
TDU_consensed_contig_39999	83	987	TDU_consensed_contig_39999,TPO_consensed_contig_40141	.	+
TDU_consensed_contig_40008	22	1229	TDU_consensed_contig_40008,TPO_consensed_contig_10148	.	+
TDU_consensed_contig_40012	0	2054	TDU_consensed_contig_40012,TPO_consensed_contig_102087	.	+
TDU_consensed_contig_40017	31	2584	TDU_consensed_contig_40017,TPO_consensed_contig_37786	.	+
TDU_consensed_contig_40022	17	2706	TDU_consensed_contig_40022,TPO_consensed_contig_40301	.	+
TDU_consensed_contig_40027	375	2273	TDU_consensed_contig_40027,TPO_consensed_contig_32472	.	+
TDU_consensed_contig_40029	115	1754	TDU_consensed_contig_40029,TPO_consensed_contig_16149	.	+
TDU_consensed_contig_40031	1	1471	TDU_consensed_contig_40031,TPO_consensed_contig_18898	.	+
TDU_consensed_contig_40033	73	1452	TDU_consensed_contig_40033,TPO_consensed_contig_106638	.	+
TDU_consensed_contig_40034	1	876	TDU_consensed_contig_40034,TPO_consensed_contig_39416	.	+
TDU_consensed_contig_40035	20	3412	TDU_consensed_contig_40035,TPO_consensed_contig_9719	.	+
TDU_consensed_contig_40036	0	1419	TDU_consensed_contig_40036,TPO_consensed_contig_37303	.	+
TDU_consensed_contig_40038	7	950	TDU_consensed_contig_40038,TPO_consensed_contig_10156	.	+
TDU_consensed_contig_40040	0	824	TDU_consensed_contig_40040,TPO_consensed_contig_111561	.	+
TDU_consensed_contig_40042	1	1447	TDU_consensed_contig_40042,TPO_consensed_contig_38370	.	+
TDU_consensed_contig_40048	0	1655	TDU_consensed_contig_40048,TPO_consensed_contig_116739	.	+
TDU_consensed_contig_40049	0	1285	TDU_consensed_contig_40049,TPO_consensed_contig_9646	.	+
TDU_consensed_contig_40052	14	1916	TDU_consensed_contig_40052,TPO_consensed_contig_37828	.	+
TDU_consensed_contig_40053	0	1760	TDU_consensed_contig_40053,TPO_consensed_contig_104554	.	+
TDU_consensed_contig_40055	87	1350	TDU_consensed_contig_40055,TPO_consensed_contig_27536	.	+
TDU_consensed_contig_40060	35	951	TDU_consensed_contig_40060,TPO_consensed_contig_96728	.	+
TDU_consensed_contig_40066	40	2142	TDU_consensed_contig_40066,TPO_consensed_contig_46236	.	+
TDU_consensed_contig_40075	20	1442	TDU_consensed_contig_40075,TPO_consensed_contig_37724	.	+
TDU_consensed_contig_40077	163	3386	TDU_consensed_contig_40077,TPO_consensed_contig_10068	.	+
TDU_consensed_contig_40079	137	3207	TDU_consensed_contig_40079,TPO_consensed_contig_17182	.	+
TDU_consensed_contig_40080	19	1867	TDU_consensed_contig_40080,TPO_consensed_contig_103478	.	+
TDU_consensed_contig_40082	1404	2178	TDU_consensed_contig_40082,TPO_consensed_contig_39247	.	+
TDU_consensed_contig_40083	95	1262	TDU_consensed_contig_40083,TPO_consensed_contig_38755	.	+
TDU_consensed_contig_40085	0	1734	TDU_consensed_contig_40085,TPO_consensed_contig_38392	.	+
TDU_consensed_contig_40093	168	2288	TDU_consensed_contig_40093,TPO_consensed_contig_10298	.	+
TDU_consensed_contig_40095	6	1028	TDU_consensed_contig_40095,TPO_consensed_contig_80299	.	+
TDU_consensed_contig_40096	4	4304	TDU_consensed_contig_40096,TPO_consensed_contig_35854	.	+
TDU_consensed_contig_40099	19	3832	TDU_consensed_contig_40099,TPO_consensed_contig_100478	.	+
TDU_consensed_contig_40112	0	2033	TDU_consensed_contig_40112,TPO_consensed_contig_35486	.	+
TDU_consensed_contig_40113	7	1542	TDU_consensed_contig_40113,TPO_consensed_contig_33069	.	+
TDU_consensed_contig_40115	13	1844	TDU_consensed_contig_40115,TPO_consensed_contig_35248	.	+
TDU_consensed_contig_40116	0	812	TDU_consensed_contig_40116,TPO_consensed_contig_105821	.	+
TDU_consensed_contig_40119	13	2221	TDU_consensed_contig_40119,TPO_consensed_contig_100941	.	+
TDU_consensed_contig_40121	135	1081	TDU_consensed_contig_40121,TPO_consensed_contig_38689	.	+
TDU_consensed_contig_40124	2	836	TDU_consensed_contig_40124,TPO_consensed_contig_27865	.	+
TDU_consensed_contig_40129	0	657	TDU_consensed_contig_40129,TPO_consensed_contig_58423	.	+
TDU_consensed_contig_40130	1131	2120	TDU_consensed_contig_40130,TPO_consensed_contig_107709	.	+
TDU_consensed_contig_40131	22	1585	TDU_consensed_contig_40131,TPO_consensed_contig_104052	.	+
TDU_consensed_contig_40133	0	1072	TDU_consensed_contig_40133,TPO_consensed_contig_69917	.	+
TDU_consensed_contig_40136	0	1850	TDU_consensed_contig_40136,TPO_consensed_contig_59035	.	+
TDU_consensed_contig_40141	13	2387	TDU_consensed_contig_40141,TPO_consensed_contig_98553	.	+
TDU_consensed_contig_40143	371	1292	TDU_consensed_contig_40143,TPO_consensed_contig_80546	.	+
TDU_consensed_contig_40145	0	1642	TDU_consensed_contig_40145,TPO_consensed_contig_5204	.	+
TDU_consensed_contig_40146	80	1423	TDU_consensed_contig_40146,TPO_consensed_contig_10774	.	+
TDU_consensed_contig_40152	41	1881	TDU_consensed_contig_40152,TPO_consensed_contig_34594	.	+
TDU_consensed_contig_40155	33	1143	TDU_consensed_contig_40155,TPO_consensed_contig_59681	.	+
TDU_consensed_contig_40157	68	1572	TDU_consensed_contig_40157,TPO_consensed_contig_3580	.	+
TDU_consensed_contig_40158	0	2047	TDU_consensed_contig_40158,TPO_consensed_contig_10696	.	+
TDU_consensed_contig_40160	0	2060	TDU_consensed_contig_40160,TPO_consensed_contig_63664	.	+
TDU_consensed_contig_40162	6	1631	TDU_consensed_contig_40162,TPO_consensed_contig_16340	.	+
TDU_consensed_contig_40163	28	2973	TDU_consensed_contig_40163,TPO_consensed_contig_97387	.	+
TDU_consensed_contig_40166	2	1704	TDU_consensed_contig_40166,TPO_consensed_contig_18826	.	+
TDU_consensed_contig_40168	1	3006	TDU_consensed_contig_40168,TPO_consensed_contig_6565	.	+
TDU_consensed_contig_40172	308	1188	TDU_consensed_contig_40172,TPO_consensed_contig_83311	.	+
TDU_consensed_contig_40175	0	1441	TDU_consensed_contig_40175,TPO_consensed_contig_107294	.	+
TDU_consensed_contig_40178	0	715	TDU_consensed_contig_40178,TPO_consensed_contig_6889	.	+
TDU_consensed_contig_40181	309	2909	TDU_consensed_contig_40181,TPO_consensed_contig_16334	.	+
TDU_consensed_contig_40185	24	1462	TDU_consensed_contig_40185,TPO_consensed_contig_87700	.	+
TDU_consensed_contig_40189	7	1458	TDU_consensed_contig_40189,TPO_consensed_contig_45993	.	+
TDU_consensed_contig_40190	68	1567	TDU_consensed_contig_40190,TPO_consensed_contig_37415	.	+
TDU_consensed_contig_40193	27	2562	TDU_consensed_contig_40193,TPO_consensed_contig_63671	.	+
TDU_consensed_contig_40194	0	2460	TDU_consensed_contig_40194,TPO_consensed_contig_20977	.	+
TDU_consensed_contig_40195	27	2477	TDU_consensed_contig_40195,TPO_consensed_contig_63672	.	+
TDU_consensed_contig_40196	0	769	TDU_consensed_contig_40196,TPO_consensed_contig_103591	.	+
TDU_consensed_contig_40197	112	1915	TDU_consensed_contig_40197,TPO_consensed_contig_39087	.	+
TDU_consensed_contig_40200	6	2412	TDU_consensed_contig_40200,TPO_consensed_contig_5941	.	+
TDU_consensed_contig_40201	3	1256	TDU_consensed_contig_40201,TPO_consensed_contig_100906	.	+
TDU_consensed_contig_40203	0	698	TDU_consensed_contig_40203,TPO_consensed_contig_27982	.	+
TDU_consensed_contig_40204	46	1626	TDU_consensed_contig_40204,TPO_consensed_contig_59071	.	+
TDU_consensed_contig_40205	46	1792	TDU_consensed_contig_40205,TPO_consensed_contig_116226	.	+
TDU_consensed_contig_40215	19	3397	TDU_consensed_contig_40215,TPO_consensed_contig_27641	.	+
TDU_consensed_contig_40218	625	1356	TDU_consensed_contig_40218,TPO_consensed_contig_116675	.	+
TDU_consensed_contig_40226	32	1978	TDU_consensed_contig_40226,TPO_consensed_contig_45200	.	+
TDU_consensed_contig_40228	27	1605	TDU_consensed_contig_40228,TPO_consensed_contig_11012	.	+
TDU_consensed_contig_40230	9	1212	TDU_consensed_contig_40230,TPO_consensed_contig_18925	.	+
TDU_consensed_contig_40231	46	686	TDU_consensed_contig_40231,TPO_consensed_contig_32862	.	+
TDU_consensed_contig_40232	46	986	TDU_consensed_contig_40232,TPO_consensed_contig_27487	.	+
TDU_consensed_contig_40238	0	1526	TDU_consensed_contig_40238,TPO_consensed_contig_8726	.	+
TDU_consensed_contig_40243	0	657	TDU_consensed_contig_40243,TPO_consensed_contig_34582	.	+
TDU_consensed_contig_40244	0	636	TDU_consensed_contig_40244,TPO_consensed_contig_34581	.	+
TDU_consensed_contig_40245	13	1475	TDU_consensed_contig_40245,TPO_consensed_contig_39178	.	+
TDU_consensed_contig_40246	13	1043	TDU_consensed_contig_40246,TPO_consensed_contig_39177	.	+
TDU_consensed_contig_40247	10	2270	TDU_consensed_contig_40247,TPO_consensed_contig_104901	.	+
TDU_consensed_contig_40250	1070	2252	TDU_consensed_contig_40250,TPO_consensed_contig_38977	.	+
TDU_consensed_contig_40257	28	2077	TDU_consensed_contig_40257,TPO_consensed_contig_38346	.	+
TDU_consensed_contig_40260	1	1087	TDU_consensed_contig_40260,TPO_consensed_contig_96457	.	+
TDU_consensed_contig_40262	0	1497	TDU_consensed_contig_40262,TPO_consensed_contig_43295	.	+
TDU_consensed_contig_40264	9	948	TDU_consensed_contig_40264,TPO_consensed_contig_8737	.	+
TDU_consensed_contig_40271	115	2029	TDU_consensed_contig_40271,TPO_consensed_contig_27455	.	+
TDU_consensed_contig_40274	1	1056	TDU_consensed_contig_40274,TPO_consensed_contig_41655	.	+
TDU_consensed_contig_40275	0	1362	TDU_consensed_contig_40275,TPO_consensed_contig_89379	.	+
TDU_consensed_contig_40276	13	669	TDU_consensed_contig_40276,TPO_consensed_contig_110618	.	+
TDU_consensed_contig_40277	0	1442	TDU_consensed_contig_40277,TPO_consensed_contig_19957	.	+
TDU_consensed_contig_40280	34	1973	TDU_consensed_contig_40280,TPO_consensed_contig_65076	.	+
TDU_consensed_contig_40282	0	1558	TDU_consensed_contig_40282,TPO_consensed_contig_92852	.	+
TDU_consensed_contig_40283	116	1649	TDU_consensed_contig_40283,TPO_consensed_contig_20793	.	+
TDU_consensed_contig_40284	0	531	TDU_consensed_contig_40284,TPO_consensed_contig_111118	.	+
TDU_consensed_contig_40286	1	1824	TDU_consensed_contig_40286,TPO_consensed_contig_17932	.	+
TDU_consensed_contig_40287	1	1688	TDU_consensed_contig_40287,TPO_consensed_contig_104002	.	+
TDU_consensed_contig_40288	1500	2052	TDU_consensed_contig_40288,TPO_consensed_contig_43139	.	+
TDU_consensed_contig_40292	30	804	TDU_consensed_contig_40292,TPO_consensed_contig_84617	.	+
TDU_consensed_contig_40293	0	806	TDU_consensed_contig_40293,TPO_consensed_contig_106354	.	+
TDU_consensed_contig_40295	60	950	TDU_consensed_contig_40295,TPO_consensed_contig_42941	.	+
TDU_consensed_contig_40297	9	684	TDU_consensed_contig_40297,TPO_consensed_contig_100373	.	+
TDU_consensed_contig_40299	13	3918	TDU_consensed_contig_40299,TPO_consensed_contig_11449	.	+
TDU_consensed_contig_40302	366	1472	TDU_consensed_contig_40302,TPO_consensed_contig_37712	.	+
TDU_consensed_contig_40304	0	1295	TDU_consensed_contig_40304,TPO_consensed_contig_17119	.	+
TDU_consensed_contig_40307	20	794	TDU_consensed_contig_40307,TPO_consensed_contig_37970	.	+
TDU_consensed_contig_40308	0	501	TDU_consensed_contig_40308,TPO_consensed_contig_104687	.	+
TDU_consensed_contig_40309	1	2131	TDU_consensed_contig_40309,TPO_consensed_contig_38736	.	+
TDU_consensed_contig_40310	15	601	TDU_consensed_contig_40310,TPO_consensed_contig_33823	.	+
TDU_consensed_contig_40312	0	1179	TDU_consensed_contig_40312,TPO_consensed_contig_41901	.	+
TDU_consensed_contig_40317	138	675	TDU_consensed_contig_40317,TPO_consensed_contig_29188	.	+
TDU_consensed_contig_40320	15	2033	TDU_consensed_contig_40320,TPO_consensed_contig_32458	.	+
TDU_consensed_contig_40322	0	875	TDU_consensed_contig_40322,TPO_consensed_contig_46327	.	+
TDU_consensed_contig_40324	54	978	TDU_consensed_contig_40324,TPO_consensed_contig_87752	.	+
TDU_consensed_contig_40329	1	920	TDU_consensed_contig_40329,TPO_consensed_contig_73264	.	+
TDU_consensed_contig_40330	1055	1740	TDU_consensed_contig_40330,TPO_consensed_contig_47780	.	+
TDU_consensed_contig_40333	42	2673	TDU_consensed_contig_40333,TPO_consensed_contig_58742	.	+
TDU_consensed_contig_40334	1	1276	TDU_consensed_contig_40334,TPO_consensed_contig_102819	.	+
TDU_consensed_contig_40343	27	1886	TDU_consensed_contig_40343,TPO_consensed_contig_42459	.	+
TDU_consensed_contig_40345	0	1331	TDU_consensed_contig_40345,TPO_consensed_contig_43593	.	+
TDU_consensed_contig_40346	0	2861	TDU_consensed_contig_40346,TPO_consensed_contig_18519	.	+
TDU_consensed_contig_40347	37	2973	TDU_consensed_contig_40347,TPO_consensed_contig_97401	.	+
TDU_consensed_contig_40350	0	1849	TDU_consensed_contig_40350,TPO_consensed_contig_65236	.	+
TDU_consensed_contig_40351	10	967	TDU_consensed_contig_40351,TPO_consensed_contig_18227	.	+
TDU_consensed_contig_40352	8	1101	TDU_consensed_contig_40352,TPO_consensed_contig_18228	.	+
TDU_consensed_contig_40353	2	858	TDU_consensed_contig_40353,TPO_consensed_contig_39793	.	+
TDU_consensed_contig_40354	270	1491	TDU_consensed_contig_40354,TPO_consensed_contig_99121	.	+
TDU_consensed_contig_40355	0	1616	TDU_consensed_contig_40355,TPO_consensed_contig_40467	.	+
TDU_consensed_contig_40359	1	3505	TDU_consensed_contig_40359,TPO_consensed_contig_36104	.	+
TDU_consensed_contig_40368	29	2467	TDU_consensed_contig_40368,TPO_consensed_contig_43881	.	+
TDU_consensed_contig_40369	0	1539	TDU_consensed_contig_40369,TPO_consensed_contig_33370	.	+
TDU_consensed_contig_40370	17	3733	TDU_consensed_contig_40370,TPO_consensed_contig_96948	.	+
TDU_consensed_contig_40372	2	1769	TDU_consensed_contig_40372,TPO_consensed_contig_21999	.	+
TDU_consensed_contig_40373	0	2066	TDU_consensed_contig_40373,TPO_consensed_contig_113093	.	+
TDU_consensed_contig_40378	0	1244	TDU_consensed_contig_40378,TPO_consensed_contig_102286	.	+
TDU_consensed_contig_40380	59	1697	TDU_consensed_contig_40380,TPO_consensed_contig_97625	.	+
TDU_consensed_contig_40381	0	1572	TDU_consensed_contig_40381,TPO_consensed_contig_97627	.	+
TDU_consensed_contig_40382	0	6693	TDU_consensed_contig_40382,TPO_consensed_contig_16150	.	+
TDU_consensed_contig_40384	143	1771	TDU_consensed_contig_40384,TPO_consensed_contig_87816	.	+
TDU_consensed_contig_40389	1262	2409	TDU_consensed_contig_40389,TPO_consensed_contig_40423	.	+
TDU_consensed_contig_40404	107	1368	TDU_consensed_contig_40404,TPO_consensed_contig_38574	.	+
TDU_consensed_contig_40409	4	789	TDU_consensed_contig_40409,TPO_consensed_contig_106893	.	+
TDU_consensed_contig_40410	0	601	TDU_consensed_contig_40410,TPO_consensed_contig_44683	.	+
TDU_consensed_contig_40412	256	1585	TDU_consensed_contig_40412,TPO_consensed_contig_41581	.	+
TDU_consensed_contig_40414	1442	2698	TDU_consensed_contig_40414,TPO_consensed_contig_39332	.	+
TDU_consensed_contig_40415	87	1513	TDU_consensed_contig_40415,TPO_consensed_contig_96870	.	+
TDU_consensed_contig_40420	13	1423	TDU_consensed_contig_40420,TPO_consensed_contig_104066	.	+
TDU_consensed_contig_40422	1	2368	TDU_consensed_contig_40422,TPO_consensed_contig_37048	.	+
TDU_consensed_contig_40427	3	1934	TDU_consensed_contig_40427,TPO_consensed_contig_115919	.	+
TDU_consensed_contig_40428	853	1917	TDU_consensed_contig_40428,TPO_consensed_contig_34184	.	+
TDU_consensed_contig_40429	15	1494	TDU_consensed_contig_40429,TPO_consensed_contig_39171	.	+
TDU_consensed_contig_40430	1	765	TDU_consensed_contig_40430,TPO_consensed_contig_20626	.	+
TDU_consensed_contig_40435	41	1930	TDU_consensed_contig_40435,TPO_consensed_contig_37085	.	+
TDU_consensed_contig_40436	141	1919	TDU_consensed_contig_40436,TPO_consensed_contig_18013	.	+
TDU_consensed_contig_40450	10	1476	TDU_consensed_contig_40450,TPO_consensed_contig_38570	.	+
TDU_consensed_contig_40453	7	1330	TDU_consensed_contig_40453,TPO_consensed_contig_27840	.	+
TDU_consensed_contig_40454	17	1871	TDU_consensed_contig_40454,TPO_consensed_contig_43118	.	+
TDU_consensed_contig_40457	49	1518	TDU_consensed_contig_40457,TPO_consensed_contig_94123	.	+
TDU_consensed_contig_40460	1	615	TDU_consensed_contig_40460,TPO_consensed_contig_102681	.	+
TDU_consensed_contig_40473	0	1503	TDU_consensed_contig_40473,TPO_consensed_contig_18773	.	+
TDU_consensed_contig_40474	4	1279	TDU_consensed_contig_40474,TPO_consensed_contig_40508	.	+
TDU_consensed_contig_40481	4	1095	TDU_consensed_contig_40481,TPO_consensed_contig_90178	.	+
TDU_consensed_contig_40482	19	1333	TDU_consensed_contig_40482,TPO_consensed_contig_35375	.	+
TDU_consensed_contig_40483	130	2268	TDU_consensed_contig_40483,TPO_consensed_contig_11879	.	+
TDU_consensed_contig_40484	0	2400	TDU_consensed_contig_40484,TPO_consensed_contig_9196	.	+
TDU_consensed_contig_40494	0	1251	TDU_consensed_contig_40494,TPO_consensed_contig_33439	.	+
TDU_consensed_contig_40508	7	1494	TDU_consensed_contig_40508,TPO_consensed_contig_105843	.	+
TDU_consensed_contig_40509	13	664	TDU_consensed_contig_40509,TPO_consensed_contig_45935	.	+
TDU_consensed_contig_40510	6	2102	TDU_consensed_contig_40510,TPO_consensed_contig_16571	.	+
TDU_consensed_contig_40513	0	1797	TDU_consensed_contig_40513,TPO_consensed_contig_85401	.	+
TDU_consensed_contig_40515	0	1733	TDU_consensed_contig_40515,TPO_consensed_contig_103885	.	+
TDU_consensed_contig_40516	3621	5169	TDU_consensed_contig_40516,TPO_consensed_contig_107990	.	+
TDU_consensed_contig_40517	0	2628	TDU_consensed_contig_40517,TPO_consensed_contig_40673	.	+
TDU_consensed_contig_40520	57	1444	TDU_consensed_contig_40520,TPO_consensed_contig_38760	.	+
TDU_consensed_contig_40523	0	1184	TDU_consensed_contig_40523,TPO_consensed_contig_94915	.	+
TDU_consensed_contig_40527	0	2181	TDU_consensed_contig_40527,TPO_consensed_contig_5425	.	+
TDU_consensed_contig_40528	43	1542	TDU_consensed_contig_40528,TPO_consensed_contig_96240	.	+
TDU_consensed_contig_40530	195	3724	TDU_consensed_contig_40530,TPO_consensed_contig_36039	.	+
TDU_consensed_contig_40533	0	563	TDU_consensed_contig_40533,TPO_consensed_contig_94043	.	+
TDU_consensed_contig_40536	1	817	TDU_consensed_contig_40536,TPO_consensed_contig_8897	.	+
TDU_consensed_contig_40537	10	681	TDU_consensed_contig_40537,TPO_consensed_contig_8898	.	+
TDU_consensed_contig_40545	8	520	TDU_consensed_contig_40545,TPO_consensed_contig_40778	.	+
TDU_consensed_contig_40560	56	2811	TDU_consensed_contig_40560,TPO_consensed_contig_35794	.	+
TDU_consensed_contig_40567	200	736	TDU_consensed_contig_40567,TPO_consensed_contig_13598	.	+
TDU_consensed_contig_40569	0	992	TDU_consensed_contig_40569,TPO_consensed_contig_95047	.	+
TDU_consensed_contig_40570	0	952	TDU_consensed_contig_40570,TPO_consensed_contig_98334	.	+
TDU_consensed_contig_40575	411	1044	TDU_consensed_contig_40575,TPO_consensed_contig_57095	.	+
TDU_consensed_contig_40576	0	2881	TDU_consensed_contig_40576,TPO_consensed_contig_37932	.	+
TDU_consensed_contig_40580	0	1889	TDU_consensed_contig_40580,TPO_consensed_contig_4558	.	+
TDU_consensed_contig_40581	0	1765	TDU_consensed_contig_40581,TPO_consensed_contig_8999	.	+
TDU_consensed_contig_40591	104	2585	TDU_consensed_contig_40591,TPO_consensed_contig_112922	.	+
TDU_consensed_contig_40592	21	6225	TDU_consensed_contig_40592,TPO_consensed_contig_96890	.	+
TDU_consensed_contig_40593	612	1232	TDU_consensed_contig_40593,TPO_consensed_contig_97213	.	+
TDU_consensed_contig_40594	0	1372	TDU_consensed_contig_40594,TPO_consensed_contig_105144	.	+
TDU_consensed_contig_40595	50	1759	TDU_consensed_contig_40595,TPO_consensed_contig_105196	.	+
TDU_consensed_contig_40596	50	1654	TDU_consensed_contig_40596,TPO_consensed_contig_105195	.	+
TDU_consensed_contig_40597	11	2031	TDU_consensed_contig_40597,TPO_consensed_contig_9852	.	+
TDU_consensed_contig_40598	1	859	TDU_consensed_contig_40598,TPO_consensed_contig_2888	.	+
TDU_consensed_contig_40606	2	1214	TDU_consensed_contig_40606,TPO_consensed_contig_17316	.	+
TDU_consensed_contig_40613	0	1937	TDU_consensed_contig_40613,TPO_consensed_contig_10446	.	+
TDU_consensed_contig_40616	53	721	TDU_consensed_contig_40616,TPO_consensed_contig_27882	.	+
TDU_consensed_contig_40617	1	2539	TDU_consensed_contig_40617,TPO_consensed_contig_20244	.	+
TDU_consensed_contig_40618	63	1048	TDU_consensed_contig_40618,TPO_consensed_contig_38325	.	+
TDU_consensed_contig_40619	0	2331	TDU_consensed_contig_40619,TPO_consensed_contig_38324	.	+
TDU_consensed_contig_40625	14	2071	TDU_consensed_contig_40625,TPO_consensed_contig_33617	.	+
TDU_consensed_contig_40627	0	1873	TDU_consensed_contig_40627,TPO_consensed_contig_37340	.	+
TDU_consensed_contig_40628	1	1395	TDU_consensed_contig_40628,TPO_consensed_contig_96774	.	+
TDU_consensed_contig_40633	31	2047	TDU_consensed_contig_40633,TPO_consensed_contig_35231	.	+
TDU_consensed_contig_40639	0	596	TDU_consensed_contig_40639,TPO_consensed_contig_17592	.	+
TDU_consensed_contig_40640	76	2965	TDU_consensed_contig_40640,TPO_consensed_contig_5895	.	+
TDU_consensed_contig_40642	36	770	TDU_consensed_contig_40642,TPO_consensed_contig_41828	.	+
TDU_consensed_contig_40647	0	2523	TDU_consensed_contig_40647,TPO_consensed_contig_18673	.	+
TDU_consensed_contig_40648	0	1478	TDU_consensed_contig_40648,TPO_consensed_contig_27935	.	+
TDU_consensed_contig_40653	0	1167	TDU_consensed_contig_40653,TPO_consensed_contig_44474	.	+
TDU_consensed_contig_40657	32	2262	TDU_consensed_contig_40657,TPO_consensed_contig_35479	.	+
TDU_consensed_contig_40659	0	4016	TDU_consensed_contig_40659,TPO_consensed_contig_34409	.	+
TDU_consensed_contig_40660	25	540	TDU_consensed_contig_40660,TPO_consensed_contig_13956	.	+
TDU_consensed_contig_40665	0	903	TDU_consensed_contig_40665,TPO_consensed_contig_105445	.	+
TDU_consensed_contig_40668	233	2067	TDU_consensed_contig_40668,TPO_consensed_contig_16743	.	+
TDU_consensed_contig_40669	0	714	TDU_consensed_contig_40669,TPO_consensed_contig_96773	.	+
TDU_consensed_contig_40670	0	1342	TDU_consensed_contig_40670,TPO_consensed_contig_98739	.	+
TDU_consensed_contig_40676	489	3106	TDU_consensed_contig_40676,TPO_consensed_contig_97390	.	+
TDU_consensed_contig_40679	0	1520	TDU_consensed_contig_40679,TPO_consensed_contig_18740	.	+
TDU_consensed_contig_40684	0	1080	TDU_consensed_contig_40684,TPO_consensed_contig_96572	.	+
TDU_consensed_contig_40690	14	1171	TDU_consensed_contig_40690,TPO_consensed_contig_36171	.	+
TDU_consensed_contig_40697	11	1476	TDU_consensed_contig_40697,TPO_consensed_contig_58960	.	+
TDU_consensed_contig_40705	5	1253	TDU_consensed_contig_40705,TPO_consensed_contig_38468	.	+
TDU_consensed_contig_40707	67	1652	TDU_consensed_contig_40707,TPO_consensed_contig_38707	.	+
TDU_consensed_contig_40708	67	1739	TDU_consensed_contig_40708,TPO_consensed_contig_105379	.	+
TDU_consensed_contig_40712	0	3380	TDU_consensed_contig_40712,TPO_consensed_contig_40546	.	+
TDU_consensed_contig_40713	30	1217	TDU_consensed_contig_40713,TPO_consensed_contig_86488	.	+
TDU_consensed_contig_40714	0	1765	TDU_consensed_contig_40714,TPO_consensed_contig_38911	.	+
TDU_consensed_contig_40717	116	2054	TDU_consensed_contig_40717,TPO_consensed_contig_95849	.	+
TDU_consensed_contig_40720	34	1295	TDU_consensed_contig_40720,TPO_consensed_contig_36050	.	+
TDU_consensed_contig_40721	0	1990	TDU_consensed_contig_40721,TPO_consensed_contig_33331	.	+
TDU_consensed_contig_40734	0	1474	TDU_consensed_contig_40734,TPO_consensed_contig_96740	.	+
TDU_consensed_contig_40735	0	845	TDU_consensed_contig_40735,TPO_consensed_contig_113123	.	+
TDU_consensed_contig_40741	161	727	TDU_consensed_contig_40741,TPO_consensed_contig_102748	.	+
TDU_consensed_contig_40744	1259	5468	TDU_consensed_contig_40744,TPO_consensed_contig_33803	.	+
TDU_consensed_contig_40752	516	2373	TDU_consensed_contig_40752,TPO_consensed_contig_39660	.	+
TDU_consensed_contig_40757	0	1196	TDU_consensed_contig_40757,TPO_consensed_contig_34659	.	+
TDU_consensed_contig_40759	43	1739	TDU_consensed_contig_40759,TPO_consensed_contig_43706	.	+
TDU_consensed_contig_40764	33	1663	TDU_consensed_contig_40764,TPO_consensed_contig_36593	.	+
TDU_consensed_contig_40765	540	2118	TDU_consensed_contig_40765,TPO_consensed_contig_58246	.	+
TDU_consensed_contig_40767	0	1225	TDU_consensed_contig_40767,TPO_consensed_contig_20911	.	+
TDU_consensed_contig_40772	73	1713	TDU_consensed_contig_40772,TPO_consensed_contig_72896	.	+
TDU_consensed_contig_40773	73	1692	TDU_consensed_contig_40773,TPO_consensed_contig_72909	.	+
TDU_consensed_contig_40774	0	2904	TDU_consensed_contig_40774,TPO_consensed_contig_12408	.	+
TDU_consensed_contig_40783	1	549	TDU_consensed_contig_40783,TPO_consensed_contig_39808	.	+
TDU_consensed_contig_40785	0	963	TDU_consensed_contig_40785,TPO_consensed_contig_40337	.	+
TDU_consensed_contig_40791	0	1518	TDU_consensed_contig_40791,TPO_consensed_contig_40608	.	+
TDU_consensed_contig_40793	0	1342	TDU_consensed_contig_40793,TPO_consensed_contig_67726	.	+
TDU_consensed_contig_40797	50	2189	TDU_consensed_contig_40797,TPO_consensed_contig_27525	.	+
TDU_consensed_contig_40801	411	2228	TDU_consensed_contig_40801,TPO_consensed_contig_70581	.	+
TDU_consensed_contig_40802	1	1044	TDU_consensed_contig_40802,TPO_consensed_contig_17459	.	+
TDU_consensed_contig_40805	22	994	TDU_consensed_contig_40805,TPO_consensed_contig_32557	.	+
TDU_consensed_contig_40806	196	2381	TDU_consensed_contig_40806,TPO_consensed_contig_116635	.	+
TDU_consensed_contig_40807	3	2643	TDU_consensed_contig_40807,TPO_consensed_contig_58265	.	+
TDU_consensed_contig_40808	3	2736	TDU_consensed_contig_40808,TPO_consensed_contig_9866	.	+
TDU_consensed_contig_40809	21	2605	TDU_consensed_contig_40809,TPO_consensed_contig_19305	.	+
TDU_consensed_contig_40810	1	859	TDU_consensed_contig_40810,TPO_consensed_contig_46461	.	+
TDU_consensed_contig_40821	133	3234	TDU_consensed_contig_40821,TPO_consensed_contig_40870	.	+
TDU_consensed_contig_40824	73	1179	TDU_consensed_contig_40824,TPO_consensed_contig_41222	.	+
TDU_consensed_contig_40831	169	1534	TDU_consensed_contig_40831,TPO_consensed_contig_43609	.	+
TDU_consensed_contig_40832	15	1485	TDU_consensed_contig_40832,TPO_consensed_contig_11174	.	+
TDU_consensed_contig_40837	13	1489	TDU_consensed_contig_40837,TPO_consensed_contig_46545	.	+
TDU_consensed_contig_40839	26	3670	TDU_consensed_contig_40839,TPO_consensed_contig_93537	.	+
TDU_consensed_contig_40841	106	1808	TDU_consensed_contig_40841,TPO_consensed_contig_37456	.	+
TDU_consensed_contig_40849	58	1259	TDU_consensed_contig_40849,TPO_consensed_contig_107475	.	+
TDU_consensed_contig_40850	63	1282	TDU_consensed_contig_40850,TPO_consensed_contig_17955	.	+
TDU_consensed_contig_40854	58	1226	TDU_consensed_contig_40854,TPO_consensed_contig_107474	.	+
TDU_consensed_contig_40856	58	1197	TDU_consensed_contig_40856,TPO_consensed_contig_107478	.	+
TDU_consensed_contig_40859	16	1310	TDU_consensed_contig_40859,TPO_consensed_contig_37918	.	+
TDU_consensed_contig_40861	1	2386	TDU_consensed_contig_40861,TPO_consensed_contig_40960	.	+
TDU_consensed_contig_40868	0	2088	TDU_consensed_contig_40868,TPO_consensed_contig_58451	.	+
TDU_consensed_contig_40871	8	2734	TDU_consensed_contig_40871,TPO_consensed_contig_9119	.	+
TDU_consensed_contig_40876	0	1226	TDU_consensed_contig_40876,TPO_consensed_contig_12723	.	+
TDU_consensed_contig_40878	0	2462	TDU_consensed_contig_40878,TPO_consensed_contig_62722	.	+
TDU_consensed_contig_40880	62	812	TDU_consensed_contig_40880,TPO_consensed_contig_71415	.	+
TDU_consensed_contig_40881	18	808	TDU_consensed_contig_40881,TPO_consensed_contig_71413	.	+
TDU_consensed_contig_40882	90	849	TDU_consensed_contig_40882,TPO_consensed_contig_71414	.	+
TDU_consensed_contig_40885	1	1043	TDU_consensed_contig_40885,TPO_consensed_contig_18431	.	+
TDU_consensed_contig_40886	13	2174	TDU_consensed_contig_40886,TPO_consensed_contig_40675	.	+
TDU_consensed_contig_40891	5	1009	TDU_consensed_contig_40891,TPO_consensed_contig_43073	.	+
TDU_consensed_contig_40892	1196	2482	TDU_consensed_contig_40892,TPO_consensed_contig_33746	.	+
TDU_consensed_contig_40893	29	2962	TDU_consensed_contig_40893,TPO_consensed_contig_9831	.	+
TDU_consensed_contig_40894	0	2354	TDU_consensed_contig_40894,TPO_consensed_contig_60870	.	+
TDU_consensed_contig_40898	13	723	TDU_consensed_contig_40898,TPO_consensed_contig_25517	.	+
TDU_consensed_contig_40899	412	1176	TDU_consensed_contig_40899,TPO_consensed_contig_26368	.	+
TDU_consensed_contig_40903	31	1095	TDU_consensed_contig_40903,TPO_consensed_contig_90222	.	+
TDU_consensed_contig_40907	46	958	TDU_consensed_contig_40907,TPO_consensed_contig_73267	.	+
TDU_consensed_contig_40909	72	1377	TDU_consensed_contig_40909,TPO_consensed_contig_104988	.	+
TDU_consensed_contig_40915	63	917	TDU_consensed_contig_40915,TPO_consensed_contig_38185	.	+
TDU_consensed_contig_40919	0	3143	TDU_consensed_contig_40919,TPO_consensed_contig_40885	.	+
TDU_consensed_contig_40921	0	3069	TDU_consensed_contig_40921,TPO_consensed_contig_40883	.	+
TDU_consensed_contig_40922	0	3119	TDU_consensed_contig_40922,TPO_consensed_contig_40886	.	+
TDU_consensed_contig_40925	76	1166	TDU_consensed_contig_40925,TPO_consensed_contig_42343	.	+
TDU_consensed_contig_40929	0	3300	TDU_consensed_contig_40929,TPO_consensed_contig_37093	.	+
TDU_consensed_contig_40932	1	2388	TDU_consensed_contig_40932,TPO_consensed_contig_37891	.	+
TDU_consensed_contig_40934	1	2355	TDU_consensed_contig_40934,TPO_consensed_contig_37892	.	+
TDU_consensed_contig_40945	40	740	TDU_consensed_contig_40945,TPO_consensed_contig_16424	.	+
TDU_consensed_contig_40951	122	790	TDU_consensed_contig_40951,TPO_consensed_contig_40804	.	+
TDU_consensed_contig_40955	34	2425	TDU_consensed_contig_40955,TPO_consensed_contig_39461	.	+
TDU_consensed_contig_40956	34	2377	TDU_consensed_contig_40956,TPO_consensed_contig_39464	.	+
TDU_consensed_contig_40959	226	1594	TDU_consensed_contig_40959,TPO_consensed_contig_59340	.	+
TDU_consensed_contig_40967	5	881	TDU_consensed_contig_40967,TPO_consensed_contig_12921	.	+
TDU_consensed_contig_40969	29	3159	TDU_consensed_contig_40969,TPO_consensed_contig_5898	.	+
TDU_consensed_contig_40976	0	976	TDU_consensed_contig_40976,TPO_consensed_contig_84810	.	+
TDU_consensed_contig_40981	0	1846	TDU_consensed_contig_40981,TPO_consensed_contig_39227	.	+
TDU_consensed_contig_40983	81	1421	TDU_consensed_contig_40983,TPO_consensed_contig_98556	.	+
TDU_consensed_contig_40985	24	858	TDU_consensed_contig_40985,TPO_consensed_contig_107905	.	+
TDU_consensed_contig_40986	3	1764	TDU_consensed_contig_40986,TPO_consensed_contig_44552	.	+
TDU_consensed_contig_40994	0	980	TDU_consensed_contig_40994,TPO_consensed_contig_19040	.	+
TDU_consensed_contig_40995	7	1894	TDU_consensed_contig_40995,TPO_consensed_contig_71060	.	+
TDU_consensed_contig_40998	0	902	TDU_consensed_contig_40998,TPO_consensed_contig_5103	.	+
TDU_consensed_contig_40999	0	821	TDU_consensed_contig_40999,TPO_consensed_contig_38153	.	+
TDU_consensed_contig_41006	0	533	TDU_consensed_contig_41006,TPO_consensed_contig_46001	.	+
TDU_consensed_contig_41007	3	1160	TDU_consensed_contig_41007,TPO_consensed_contig_18514	.	+
TDU_consensed_contig_41009	19	1273	TDU_consensed_contig_41009,TPO_consensed_contig_105687	.	+
TDU_consensed_contig_41012	0	781	TDU_consensed_contig_41012,TPO_consensed_contig_41528	.	+
TDU_consensed_contig_41013	0	953	TDU_consensed_contig_41013,TPO_consensed_contig_41536	.	+
TDU_consensed_contig_41014	143	2284	TDU_consensed_contig_41014,TPO_consensed_contig_41535	.	+
TDU_consensed_contig_41018	0	2061	TDU_consensed_contig_41018,TPO_consensed_contig_97301	.	+
TDU_consensed_contig_41024	0	1064	TDU_consensed_contig_41024,TPO_consensed_contig_70412	.	+
TDU_consensed_contig_41027	397	1191	TDU_consensed_contig_41027,TPO_consensed_contig_89320	.	+
TDU_consensed_contig_41028	0	2912	TDU_consensed_contig_41028,TPO_consensed_contig_8817	.	+
TDU_consensed_contig_41030	1666	4171	TDU_consensed_contig_41030,TPO_consensed_contig_106424	.	+
TDU_consensed_contig_41031	22	1036	TDU_consensed_contig_41031,TPO_consensed_contig_38018	.	+
TDU_consensed_contig_41032	151	949	TDU_consensed_contig_41032,TPO_consensed_contig_19601	.	+
TDU_consensed_contig_41034	56	2958	TDU_consensed_contig_41034,TPO_consensed_contig_21535	.	+
TDU_consensed_contig_41035	6	1474	TDU_consensed_contig_41035,TPO_consensed_contig_27503	.	+
TDU_consensed_contig_41036	139	1801	TDU_consensed_contig_41036,TPO_consensed_contig_40599	.	+
TDU_consensed_contig_41037	27	1584	TDU_consensed_contig_41037,TPO_consensed_contig_32766	.	+
TDU_consensed_contig_41038	0	4258	TDU_consensed_contig_41038,TPO_consensed_contig_41201	.	+
TDU_consensed_contig_41061	166	2932	TDU_consensed_contig_41061,TPO_consensed_contig_37248	.	+
TDU_consensed_contig_41063	25	3395	TDU_consensed_contig_41063,TPO_consensed_contig_38243	.	+
TDU_consensed_contig_41064	4	1879	TDU_consensed_contig_41064,TPO_consensed_contig_39831	.	+
TDU_consensed_contig_41065	0	2163	TDU_consensed_contig_41065,TPO_consensed_contig_39830	.	+
TDU_consensed_contig_41067	0	1987	TDU_consensed_contig_41067,TPO_consensed_contig_40022	.	+
TDU_consensed_contig_41073	0	3146	TDU_consensed_contig_41073,TPO_consensed_contig_38027	.	+
TDU_consensed_contig_41074	1	2766	TDU_consensed_contig_41074,TPO_consensed_contig_37751	.	+
TDU_consensed_contig_41086	53	1657	TDU_consensed_contig_41086,TPO_consensed_contig_38433	.	+
TDU_consensed_contig_41088	53	1734	TDU_consensed_contig_41088,TPO_consensed_contig_59283	.	+
TDU_consensed_contig_41090	106	1169	TDU_consensed_contig_41090,TPO_consensed_contig_95814	.	+
TDU_consensed_contig_41094	309	826	TDU_consensed_contig_41094,TPO_consensed_contig_10458	.	+
TDU_consensed_contig_41096	2	1182	TDU_consensed_contig_41096,TPO_consensed_contig_37152	.	+
TDU_consensed_contig_41097	80	1226	TDU_consensed_contig_41097,TPO_consensed_contig_37153	.	+
TDU_consensed_contig_41119	52	1335	TDU_consensed_contig_41119,TPO_consensed_contig_40711	.	+
TDU_consensed_contig_41124	710	1298	TDU_consensed_contig_41124,TPO_consensed_contig_31413	.	+
TDU_consensed_contig_41126	0	812	TDU_consensed_contig_41126,TPO_consensed_contig_34835	.	+
TDU_consensed_contig_41127	5	2270	TDU_consensed_contig_41127,TPO_consensed_contig_96127	.	+
TDU_consensed_contig_41128	0	2833	TDU_consensed_contig_41128,TPO_consensed_contig_43864	.	+
TDU_consensed_contig_41130	66	1767	TDU_consensed_contig_41130,TPO_consensed_contig_35300	.	+
TDU_consensed_contig_41131	66	1799	TDU_consensed_contig_41131,TPO_consensed_contig_35299	.	+
TDU_consensed_contig_41133	27	2344	TDU_consensed_contig_41133,TPO_consensed_contig_10288	.	+
TDU_consensed_contig_41138	48	579	TDU_consensed_contig_41138,TPO_consensed_contig_99108	.	+
TDU_consensed_contig_41141	0	970	TDU_consensed_contig_41141,TPO_consensed_contig_85952	.	+
TDU_consensed_contig_41142	119	3529	TDU_consensed_contig_41142,TPO_consensed_contig_97283	.	+
TDU_consensed_contig_41146	70	628	TDU_consensed_contig_41146,TPO_consensed_contig_27780	.	+
TDU_consensed_contig_41148	4	2387	TDU_consensed_contig_41148,TPO_consensed_contig_23758	.	+
TDU_consensed_contig_41156	3	1357	TDU_consensed_contig_41156,TPO_consensed_contig_91131	.	+
TDU_consensed_contig_41160	3	791	TDU_consensed_contig_41160,TPO_consensed_contig_97105	.	+
TDU_consensed_contig_41170	4	846	TDU_consensed_contig_41170,TPO_consensed_contig_46524	.	+
TDU_consensed_contig_41171	0	1762	TDU_consensed_contig_41171,TPO_consensed_contig_58678	.	+
TDU_consensed_contig_41173	0	550	TDU_consensed_contig_41173,TPO_consensed_contig_38216	.	+
TDU_consensed_contig_41176	0	1297	TDU_consensed_contig_41176,TPO_consensed_contig_27744	.	+
TDU_consensed_contig_41177	2	2246	TDU_consensed_contig_41177,TPO_consensed_contig_58996	.	+
TDU_consensed_contig_41178	856	1408	TDU_consensed_contig_41178,TPO_consensed_contig_84241	.	+
TDU_consensed_contig_41180	5	543	TDU_consensed_contig_41180,TPO_consensed_contig_43372	.	+
TDU_consensed_contig_41184	0	990	TDU_consensed_contig_41184,TPO_consensed_contig_112841	.	+
TDU_consensed_contig_41186	963	1863	TDU_consensed_contig_41186,TPO_consensed_contig_41415	.	+
TDU_consensed_contig_41187	0	793	TDU_consensed_contig_41187,TPO_consensed_contig_97900	.	+
TDU_consensed_contig_41189	235	5368	TDU_consensed_contig_41189,TPO_consensed_contig_38410	.	+
TDU_consensed_contig_41190	24	1747	TDU_consensed_contig_41190,TPO_consensed_contig_40170	.	+
TDU_consensed_contig_41193	1	1923	TDU_consensed_contig_41193,TPO_consensed_contig_110408	.	+
TDU_consensed_contig_41194	0	1774	TDU_consensed_contig_41194,TPO_consensed_contig_44040	.	+
TDU_consensed_contig_41197	70	2288	TDU_consensed_contig_41197,TPO_consensed_contig_94533	.	+
TDU_consensed_contig_41198	18	1951	TDU_consensed_contig_41198,TPO_consensed_contig_87887	.	+
TDU_consensed_contig_41199	18	1838	TDU_consensed_contig_41199,TPO_consensed_contig_87888	.	+
TDU_consensed_contig_41203	0	1678	TDU_consensed_contig_41203,TPO_consensed_contig_37374	.	+
TDU_consensed_contig_41207	0	1100	TDU_consensed_contig_41207,TPO_consensed_contig_46069	.	+
TDU_consensed_contig_41211	37	1398	TDU_consensed_contig_41211,TPO_consensed_contig_73147	.	+
TDU_consensed_contig_41212	436	4510	TDU_consensed_contig_41212,TPO_consensed_contig_18913	.	+
TDU_consensed_contig_41217	5	949	TDU_consensed_contig_41217,TPO_consensed_contig_46308	.	+
TDU_consensed_contig_41220	518	1542	TDU_consensed_contig_41220,TPO_consensed_contig_32614	.	+
TDU_consensed_contig_41221	1	2102	TDU_consensed_contig_41221,TPO_consensed_contig_10607	.	+
TDU_consensed_contig_41223	0	3060	TDU_consensed_contig_41223,TPO_consensed_contig_113454	.	+
TDU_consensed_contig_41224	0	1436	TDU_consensed_contig_41224,TPO_consensed_contig_35969	.	+
TDU_consensed_contig_41226	0	901	TDU_consensed_contig_41226,TPO_consensed_contig_35436	.	+
TDU_consensed_contig_41231	8	1156	TDU_consensed_contig_41231,TPO_consensed_contig_43585	.	+
TDU_consensed_contig_41243	1	998	TDU_consensed_contig_41243,TPO_consensed_contig_107641	.	+
TDU_consensed_contig_41248	0	633	TDU_consensed_contig_41248,TPO_consensed_contig_36803	.	+
TDU_consensed_contig_41256	3	1388	TDU_consensed_contig_41256,TPO_consensed_contig_36115	.	+
TDU_consensed_contig_41257	3	1480	TDU_consensed_contig_41257,TPO_consensed_contig_36116	.	+
TDU_consensed_contig_41264	14	872	TDU_consensed_contig_41264,TPO_consensed_contig_110818	.	+
TDU_consensed_contig_41266	1	1418	TDU_consensed_contig_41266,TPO_consensed_contig_43386	.	+
TDU_consensed_contig_41273	49	876	TDU_consensed_contig_41273,TPO_consensed_contig_84946	.	+
TDU_consensed_contig_41274	0	937	TDU_consensed_contig_41274,TPO_consensed_contig_16444	.	+
TDU_consensed_contig_41278	6	746	TDU_consensed_contig_41278,TPO_consensed_contig_11676	.	+
TDU_consensed_contig_41284	0	1574	TDU_consensed_contig_41284,TPO_consensed_contig_84137	.	+
TDU_consensed_contig_41285	48	2436	TDU_consensed_contig_41285,TPO_consensed_contig_33162	.	+
TDU_consensed_contig_41290	0	999	TDU_consensed_contig_41290,TPO_consensed_contig_102693	.	+
TDU_consensed_contig_41292	0	740	TDU_consensed_contig_41292,TPO_consensed_contig_36847	.	+
TDU_consensed_contig_41294	0	1722	TDU_consensed_contig_41294,TPO_consensed_contig_39690	.	+
TDU_consensed_contig_41297	19	1013	TDU_consensed_contig_41297,TPO_consensed_contig_73224	.	+
TDU_consensed_contig_41301	3	817	TDU_consensed_contig_41301,TPO_consensed_contig_33175	.	+
TDU_consensed_contig_41305	21	3429	TDU_consensed_contig_41305,TPO_consensed_contig_18970	.	+
TDU_consensed_contig_41317	961	1595	TDU_consensed_contig_41317,TPO_consensed_contig_99732	.	+
TDU_consensed_contig_41320	94	1788	TDU_consensed_contig_41320,TPO_consensed_contig_17832	.	+
TDU_consensed_contig_41322	84	1851	TDU_consensed_contig_41322,TPO_consensed_contig_10127	.	+
TDU_consensed_contig_41342	29	1432	TDU_consensed_contig_41342,TPO_consensed_contig_38092	.	+
TDU_consensed_contig_41343	422	2407	TDU_consensed_contig_41343,TPO_consensed_contig_27514	.	+
TDU_consensed_contig_41348	0	3464	TDU_consensed_contig_41348,TPO_consensed_contig_38365	.	+
TDU_consensed_contig_41362	0	3094	TDU_consensed_contig_41362,TPO_consensed_contig_41374	.	+
TDU_consensed_contig_41365	20	1042	TDU_consensed_contig_41365,TPO_consensed_contig_95423	.	+
TDU_consensed_contig_41368	20	1128	TDU_consensed_contig_41368,TPO_consensed_contig_95422	.	+
TDU_consensed_contig_41370	480	1435	TDU_consensed_contig_41370,TPO_consensed_contig_32135	.	+
TDU_consensed_contig_41371	480	1370	TDU_consensed_contig_41371,TPO_consensed_contig_32136	.	+
TDU_consensed_contig_41373	23	926	TDU_consensed_contig_41373,TPO_consensed_contig_39211	.	+
TDU_consensed_contig_41375	69	1204	TDU_consensed_contig_41375,TPO_consensed_contig_23791	.	+
TDU_consensed_contig_41377	40	1786	TDU_consensed_contig_41377,TPO_consensed_contig_33476	.	+
TDU_consensed_contig_41378	0	993	TDU_consensed_contig_41378,TPO_consensed_contig_35820	.	+
TDU_consensed_contig_41380	4	2358	TDU_consensed_contig_41380,TPO_consensed_contig_40621	.	+
TDU_consensed_contig_41384	7	1312	TDU_consensed_contig_41384,TPO_consensed_contig_35019	.	+
TDU_consensed_contig_41387	8	2164	TDU_consensed_contig_41387,TPO_consensed_contig_76949	.	+
TDU_consensed_contig_41389	12	1694	TDU_consensed_contig_41389,TPO_consensed_contig_105726	.	+
TDU_consensed_contig_41399	0	2089	TDU_consensed_contig_41399,TPO_consensed_contig_44570	.	+
TDU_consensed_contig_41401	0	911	TDU_consensed_contig_41401,TPO_consensed_contig_34925	.	+
TDU_consensed_contig_41408	3	1678	TDU_consensed_contig_41408,TPO_consensed_contig_65805	.	+
TDU_consensed_contig_41409	724	1790	TDU_consensed_contig_41409,TPO_consensed_contig_19730	.	+
TDU_consensed_contig_41410	0	1911	TDU_consensed_contig_41410,TPO_consensed_contig_36457	.	+
TDU_consensed_contig_41412	0	2578	TDU_consensed_contig_41412,TPO_consensed_contig_33608	.	+
TDU_consensed_contig_41414	0	1787	TDU_consensed_contig_41414,TPO_consensed_contig_40909	.	+
TDU_consensed_contig_41417	19	2259	TDU_consensed_contig_41417,TPO_consensed_contig_109637	.	+
TDU_consensed_contig_41418	1	1703	TDU_consensed_contig_41418,TPO_consensed_contig_17763	.	+
TDU_consensed_contig_41419	0	1252	TDU_consensed_contig_41419,TPO_consensed_contig_59108	.	+
TDU_consensed_contig_41420	0	526	TDU_consensed_contig_41420,TPO_consensed_contig_59109	.	+
TDU_consensed_contig_41421	10	916	TDU_consensed_contig_41421,TPO_consensed_contig_104825	.	+
TDU_consensed_contig_41422	10	1510	TDU_consensed_contig_41422,TPO_consensed_contig_35737	.	+
TDU_consensed_contig_41423	110	685	TDU_consensed_contig_41423,TPO_consensed_contig_47763	.	+
TDU_consensed_contig_41428	0	746	TDU_consensed_contig_41428,TPO_consensed_contig_100954	.	+
TDU_consensed_contig_41430	0	2316	TDU_consensed_contig_41430,TPO_consensed_contig_5301	.	+
TDU_consensed_contig_41433	178	1514	TDU_consensed_contig_41433,TPO_consensed_contig_96341	.	+
TDU_consensed_contig_41434	27	2199	TDU_consensed_contig_41434,TPO_consensed_contig_43398	.	+
TDU_consensed_contig_41435	23	1002	TDU_consensed_contig_41435,TPO_consensed_contig_88847	.	+
TDU_consensed_contig_41436	0	574	TDU_consensed_contig_41436,TPO_consensed_contig_38142	.	+
TDU_consensed_contig_41438	0	1084	TDU_consensed_contig_41438,TPO_consensed_contig_10312	.	+
TDU_consensed_contig_41444	27	861	TDU_consensed_contig_41444,TPO_consensed_contig_11851	.	+
TDU_consensed_contig_41451	40	1119	TDU_consensed_contig_41451,TPO_consensed_contig_41144	.	+
TDU_consensed_contig_41452	0	2060	TDU_consensed_contig_41452,TPO_consensed_contig_35357	.	+
TDU_consensed_contig_41453	1	1119	TDU_consensed_contig_41453,TPO_consensed_contig_39369	.	+
TDU_consensed_contig_41458	908	1409	TDU_consensed_contig_41458,TPO_consensed_contig_106651	.	+
TDU_consensed_contig_41459	908	1802	TDU_consensed_contig_41459,TPO_consensed_contig_39845	.	+
TDU_consensed_contig_41461	26	2051	TDU_consensed_contig_41461,TPO_consensed_contig_33234	.	+
TDU_consensed_contig_41466	164	810	TDU_consensed_contig_41466,TPO_consensed_contig_49689	.	+
TDU_consensed_contig_41476	10	1527	TDU_consensed_contig_41476,TPO_consensed_contig_34650	.	+
TDU_consensed_contig_41478	4	1041	TDU_consensed_contig_41478,TPO_consensed_contig_45818	.	+
TDU_consensed_contig_41479	0	2572	TDU_consensed_contig_41479,TPO_consensed_contig_59141	.	+
TDU_consensed_contig_41489	2	1035	TDU_consensed_contig_41489,TPO_consensed_contig_5586	.	+
TDU_consensed_contig_41490	2	972	TDU_consensed_contig_41490,TPO_consensed_contig_8837	.	+
TDU_consensed_contig_41507	12	823	TDU_consensed_contig_41507,TPO_consensed_contig_58718	.	+
TDU_consensed_contig_41509	0	1886	TDU_consensed_contig_41509,TPO_consensed_contig_6898	.	+
TDU_consensed_contig_41518	53	1318	TDU_consensed_contig_41518,TPO_consensed_contig_104749	.	+
TDU_consensed_contig_41519	22	670	TDU_consensed_contig_41519,TPO_consensed_contig_37278	.	+
TDU_consensed_contig_41521	276	2457	TDU_consensed_contig_41521,TPO_consensed_contig_26484	.	+
TDU_consensed_contig_41522	41	2322	TDU_consensed_contig_41522,TPO_consensed_contig_44449	.	+
TDU_consensed_contig_41523	70	1243	TDU_consensed_contig_41523,TPO_consensed_contig_19240	.	+
TDU_consensed_contig_41528	827	1576	TDU_consensed_contig_41528,TPO_consensed_contig_91026	.	+
TDU_consensed_contig_41530	0	795	TDU_consensed_contig_41530,TPO_consensed_contig_35838	.	+
TDU_consensed_contig_41531	6	1750	TDU_consensed_contig_41531,TPO_consensed_contig_38421	.	+
TDU_consensed_contig_41532	117	1515	TDU_consensed_contig_41532,TPO_consensed_contig_34795	.	+
TDU_consensed_contig_41536	0	2162	TDU_consensed_contig_41536,TPO_consensed_contig_84406	.	+
TDU_consensed_contig_41544	10	1747	TDU_consensed_contig_41544,TPO_consensed_contig_71445	.	+
TDU_consensed_contig_41546	25	1008	TDU_consensed_contig_41546,TPO_consensed_contig_10002	.	+
TDU_consensed_contig_41547	25	1998	TDU_consensed_contig_41547,TPO_consensed_contig_10003	.	+
TDU_consensed_contig_41552	0	1112	TDU_consensed_contig_41552,TPO_consensed_contig_21869	.	+
TDU_consensed_contig_41553	0	604	TDU_consensed_contig_41553,TPO_consensed_contig_10845	.	+
TDU_consensed_contig_41555	14	720	TDU_consensed_contig_41555,TPO_consensed_contig_18892	.	+
TDU_consensed_contig_41557	0	672	TDU_consensed_contig_41557,TPO_consensed_contig_44884	.	+
TDU_consensed_contig_41558	0	591	TDU_consensed_contig_41558,TPO_consensed_contig_68062	.	+
TDU_consensed_contig_41561	0	1991	TDU_consensed_contig_41561,TPO_consensed_contig_43038	.	+
TDU_consensed_contig_41562	107	3371	TDU_consensed_contig_41562,TPO_consensed_contig_34105	.	+
TDU_consensed_contig_41565	70	1086	TDU_consensed_contig_41565,TPO_consensed_contig_95935	.	+
TDU_consensed_contig_2703	9	613	TDU_consensed_contig_2703,TPO_consensed_contig_54381	.	+
TDU_consensed_contig_2704	0	1375	TDU_consensed_contig_2704,TPO_consensed_contig_13379	.	+
TDU_consensed_contig_2705	0	2604	TDU_consensed_contig_2705,TPO_consensed_contig_34335	.	+
TDU_consensed_contig_2706	104	693	TDU_consensed_contig_2706,TPO_consensed_contig_47521	.	+
TDU_consensed_contig_2707	35	1596	TDU_consensed_contig_2707,TPO_consensed_contig_9353	.	+
TDU_consensed_contig_2708	119	1487	TDU_consensed_contig_2708,TPO_consensed_contig_32481	.	+
TDU_consensed_contig_2713	21	1427	TDU_consensed_contig_2713,TPO_consensed_contig_32165	.	+
TDU_consensed_contig_2720	30	1790	TDU_consensed_contig_2720,TPO_consensed_contig_4334	.	+
TDU_consensed_contig_2721	14	738	TDU_consensed_contig_2721,TPO_consensed_contig_35940	.	+
TDU_consensed_contig_2723	0	1035	TDU_consensed_contig_2723,TPO_consensed_contig_84607	.	+
TDU_consensed_contig_2724	66	896	TDU_consensed_contig_2724,TPO_consensed_contig_89299	.	+
TDU_consensed_contig_2727	0	2560	TDU_consensed_contig_2727,TPO_consensed_contig_116765	.	+
TDU_consensed_contig_2738	162	1320	TDU_consensed_contig_2738,TPO_consensed_contig_115891	.	+
TDU_consensed_contig_2740	345	921	TDU_consensed_contig_2740,TPO_consensed_contig_84533	.	+
TDU_consensed_contig_2753	237	771	TDU_consensed_contig_2753,TPO_consensed_contig_28355	.	+
TDU_consensed_contig_2754	0	628	TDU_consensed_contig_2754,TPO_consensed_contig_85479	.	+
TDU_consensed_contig_2755	611	1525	TDU_consensed_contig_2755,TPO_consensed_contig_41511	.	+
TDU_consensed_contig_2757	0	1445	TDU_consensed_contig_2757,TPO_consensed_contig_27983	.	+
TDU_consensed_contig_2774	42	1954	TDU_consensed_contig_2774,TPO_consensed_contig_84555	.	+
TDU_consensed_contig_2775	14	1301	TDU_consensed_contig_2775,TPO_consensed_contig_67021	.	+
TDU_consensed_contig_2776	1	1311	TDU_consensed_contig_2776,TPO_consensed_contig_82873	.	+
TDU_consensed_contig_2779	0	1417	TDU_consensed_contig_2779,TPO_consensed_contig_85937	.	+
TDU_consensed_contig_2781	307	1586	TDU_consensed_contig_2781,TPO_consensed_contig_100339	.	+
TDU_consensed_contig_2783	88	1099	TDU_consensed_contig_2783,TPO_consensed_contig_96111	.	+
TDU_consensed_contig_2786	0	1161	TDU_consensed_contig_2786,TPO_consensed_contig_17569	.	+
TDU_consensed_contig_2788	70	1400	TDU_consensed_contig_2788,TPO_consensed_contig_57457	.	+
TDU_consensed_contig_2789	76	861	TDU_consensed_contig_2789,TPO_consensed_contig_16236	.	+
TDU_consensed_contig_2790	169	1931	TDU_consensed_contig_2790,TPO_consensed_contig_8714	.	+
TDU_consensed_contig_2798	38	1090	TDU_consensed_contig_2798,TPO_consensed_contig_100460	.	+
TDU_consensed_contig_2803	0	1131	TDU_consensed_contig_2803,TPO_consensed_contig_32189	.	+
TDU_consensed_contig_2820	65	799	TDU_consensed_contig_2820,TPO_consensed_contig_86084	.	+
TDU_consensed_contig_2824	38	1267	TDU_consensed_contig_2824,TPO_consensed_contig_85012	.	+
TDU_consensed_contig_2827	0	572	TDU_consensed_contig_2827,TPO_consensed_contig_68709	.	+
TDU_consensed_contig_2833	87	1523	TDU_consensed_contig_2833,TPO_consensed_contig_96754	.	+
TDU_consensed_contig_2840	528	1121	TDU_consensed_contig_2840,TPO_consensed_contig_73469	.	+
TDU_consensed_contig_2841	1	634	TDU_consensed_contig_2841,TPO_consensed_contig_71475	.	+
TDU_consensed_contig_2847	1	549	TDU_consensed_contig_2847,TPO_consensed_contig_13012	.	+
TDU_consensed_contig_2865	13	1293	TDU_consensed_contig_2865,TPO_consensed_contig_3091	.	+
TDU_consensed_contig_2866	2	616	TDU_consensed_contig_2866,TPO_consensed_contig_38174	.	+
TDU_consensed_contig_2871	6	1804	TDU_consensed_contig_2871,TPO_consensed_contig_38457	.	+
TDU_consensed_contig_2873	3	1220	TDU_consensed_contig_2873,TPO_consensed_contig_5330	.	+
TDU_consensed_contig_2874	109	1503	TDU_consensed_contig_2874,TPO_consensed_contig_39317	.	+
TDU_consensed_contig_2877	70	1024	TDU_consensed_contig_2877,TPO_consensed_contig_36089	.	+
TDU_consensed_contig_2890	14	696	TDU_consensed_contig_2890,TPO_consensed_contig_17372	.	+
TDU_consensed_contig_2892	7	845	TDU_consensed_contig_2892,TPO_consensed_contig_102074	.	+
TDU_consensed_contig_2893	85	2206	TDU_consensed_contig_2893,TPO_consensed_contig_102847	.	+
TDU_consensed_contig_2900	3	913	TDU_consensed_contig_2900,TPO_consensed_contig_100208	.	+
TDU_consensed_contig_2901	0	575	TDU_consensed_contig_2901,TPO_consensed_contig_61971	.	+
TDU_consensed_contig_2905	10	710	TDU_consensed_contig_2905,TPO_consensed_contig_36198	.	+
TDU_consensed_contig_2906	3	1484	TDU_consensed_contig_2906,TPO_consensed_contig_38270	.	+
TDU_consensed_contig_2907	1	1161	TDU_consensed_contig_2907,TPO_consensed_contig_85341	.	+
TDU_consensed_contig_2915	468	1414	TDU_consensed_contig_2915,TPO_consensed_contig_115744	.	+
TDU_consensed_contig_2919	775	2288	TDU_consensed_contig_2919,TPO_consensed_contig_89958	.	+
TDU_consensed_contig_2926	1215	2821	TDU_consensed_contig_2926,TPO_consensed_contig_21908	.	+
TDU_consensed_contig_2969	228	3013	TDU_consensed_contig_2969,TPO_consensed_contig_97006	.	+
TDU_consensed_contig_2992	741	1527	TDU_consensed_contig_2992,TPO_consensed_contig_103406	.	+
TDU_consensed_contig_41580	5	1999	TDU_consensed_contig_41580,TPO_consensed_contig_64198	.	+
TDU_consensed_contig_41582	0	1863	TDU_consensed_contig_41582,TPO_consensed_contig_97062	.	+
TDU_consensed_contig_41583	47	1387	TDU_consensed_contig_41583,TPO_consensed_contig_114903	.	+
TDU_consensed_contig_41587	25	1300	TDU_consensed_contig_41587,TPO_consensed_contig_11310	.	+
TDU_consensed_contig_41588	6	1157	TDU_consensed_contig_41588,TPO_consensed_contig_44072	.	+
TDU_consensed_contig_41602	0	1706	TDU_consensed_contig_41602,TPO_consensed_contig_39472	.	+
TDU_consensed_contig_41603	17	1676	TDU_consensed_contig_41603,TPO_consensed_contig_97473	.	+
TDU_consensed_contig_41604	7	2378	TDU_consensed_contig_41604,TPO_consensed_contig_10641	.	+
TDU_consensed_contig_41612	0	1363	TDU_consensed_contig_41612,TPO_consensed_contig_32665	.	+
TDU_consensed_contig_41614	21	722	TDU_consensed_contig_41614,TPO_consensed_contig_9232	.	+
TDU_consensed_contig_41615	0	844	TDU_consensed_contig_41615,TPO_consensed_contig_26721	.	+
TDU_consensed_contig_41616	0	647	TDU_consensed_contig_41616,TPO_consensed_contig_38820	.	+
TDU_consensed_contig_41620	0	982	TDU_consensed_contig_41620,TPO_consensed_contig_66073	.	+
TDU_consensed_contig_41622	0	1652	TDU_consensed_contig_41622,TPO_consensed_contig_40412	.	+
TDU_consensed_contig_41626	30	1596	TDU_consensed_contig_41626,TPO_consensed_contig_34954	.	+
TDU_consensed_contig_41628	0	1480	TDU_consensed_contig_41628,TPO_consensed_contig_44782	.	+
TDU_consensed_contig_41635	0	1948	TDU_consensed_contig_41635,TPO_consensed_contig_111818	.	+
TDU_consensed_contig_41636	30	663	TDU_consensed_contig_41636,TPO_consensed_contig_17588	.	+
TDU_consensed_contig_41637	0	1855	TDU_consensed_contig_41637,TPO_consensed_contig_38181	.	+
TDU_consensed_contig_41657	36	1502	TDU_consensed_contig_41657,TPO_consensed_contig_12925	.	+
TDU_consensed_contig_41659	0	3141	TDU_consensed_contig_41659,TPO_consensed_contig_19308	.	+
TDU_consensed_contig_41660	0	889	TDU_consensed_contig_41660,TPO_consensed_contig_60367	.	+
TDU_consensed_contig_41661	36	1186	TDU_consensed_contig_41661,TPO_consensed_contig_20404	.	+
TDU_consensed_contig_41663	0	1364	TDU_consensed_contig_41663,TPO_consensed_contig_4801	.	+
TDU_consensed_contig_41664	6	1047	TDU_consensed_contig_41664,TPO_consensed_contig_33426	.	+
TDU_consensed_contig_41675	102	7165	TDU_consensed_contig_41675,TPO_consensed_contig_41053	.	+
TDU_consensed_contig_41703	0	1748	TDU_consensed_contig_41703,TPO_consensed_contig_62971	.	+
TDU_consensed_contig_41704	0	670	TDU_consensed_contig_41704,TPO_consensed_contig_19847	.	+
TDU_consensed_contig_41707	21	1269	TDU_consensed_contig_41707,TPO_consensed_contig_18571	.	+
TDU_consensed_contig_41713	247	3109	TDU_consensed_contig_41713,TPO_consensed_contig_41316	.	+
TDU_consensed_contig_41714	247	3030	TDU_consensed_contig_41714,TPO_consensed_contig_41318	.	+
TDU_consensed_contig_41717	349	1110	TDU_consensed_contig_41717,TPO_consensed_contig_116199	.	+
TDU_consensed_contig_41729	86	1535	TDU_consensed_contig_41729,TPO_consensed_contig_5981	.	+
TDU_consensed_contig_41735	12	1347	TDU_consensed_contig_41735,TPO_consensed_contig_106765	.	+
TDU_consensed_contig_41737	0	1782	TDU_consensed_contig_41737,TPO_consensed_contig_105037	.	+
TDU_consensed_contig_41738	72	1260	TDU_consensed_contig_41738,TPO_consensed_contig_94308	.	+
TDU_consensed_contig_41744	0	2146	TDU_consensed_contig_41744,TPO_consensed_contig_71039	.	+
TDU_consensed_contig_41745	0	1494	TDU_consensed_contig_41745,TPO_consensed_contig_66386	.	+
TDU_consensed_contig_41749	1	608	TDU_consensed_contig_41749,TPO_consensed_contig_89336	.	+
TDU_consensed_contig_41752	24	552	TDU_consensed_contig_41752,TPO_consensed_contig_83191	.	+
TDU_consensed_contig_41761	26	646	TDU_consensed_contig_41761,TPO_consensed_contig_98369	.	+
TDU_consensed_contig_41762	25	1382	TDU_consensed_contig_41762,TPO_consensed_contig_16470	.	+
TDU_consensed_contig_41790	1	2543	TDU_consensed_contig_41790,TPO_consensed_contig_112997	.	+
TDU_consensed_contig_41791	135	2008	TDU_consensed_contig_41791,TPO_consensed_contig_96473	.	+
TDU_consensed_contig_41795	4	748	TDU_consensed_contig_41795,TPO_consensed_contig_39996	.	+
TDU_consensed_contig_41796	4	728	TDU_consensed_contig_41796,TPO_consensed_contig_106780	.	+
TDU_consensed_contig_41797	47	945	TDU_consensed_contig_41797,TPO_consensed_contig_97563	.	+
TDU_consensed_contig_41798	114	1437	TDU_consensed_contig_41798,TPO_consensed_contig_86130	.	+
TDU_consensed_contig_41800	0	764	TDU_consensed_contig_41800,TPO_consensed_contig_43244	.	+
TDU_consensed_contig_41810	151	1614	TDU_consensed_contig_41810,TPO_consensed_contig_87671	.	+
TDU_consensed_contig_41815	0	2191	TDU_consensed_contig_41815,TPO_consensed_contig_66622	.	+
TDU_consensed_contig_41823	37	2648	TDU_consensed_contig_41823,TPO_consensed_contig_113494	.	+
TDU_consensed_contig_41824	0	1333	TDU_consensed_contig_41824,TPO_consensed_contig_37082	.	+
TDU_consensed_contig_41825	989	1506	TDU_consensed_contig_41825,TPO_consensed_contig_97303	.	+
TDU_consensed_contig_41839	14	2748	TDU_consensed_contig_41839,TPO_consensed_contig_6675	.	+
TDU_consensed_contig_41840	14	2685	TDU_consensed_contig_41840,TPO_consensed_contig_6676	.	+
TDU_consensed_contig_41841	135	3205	TDU_consensed_contig_41841,TPO_consensed_contig_21096	.	+
TDU_consensed_contig_41852	798	1475	TDU_consensed_contig_41852,TPO_consensed_contig_82845	.	+
TDU_consensed_contig_41858	15	845	TDU_consensed_contig_41858,TPO_consensed_contig_64024	.	+
TDU_consensed_contig_41864	150	688	TDU_consensed_contig_41864,TPO_consensed_contig_41519	.	+
TDU_consensed_contig_41865	21	833	TDU_consensed_contig_41865,TPO_consensed_contig_62131	.	+
TDU_consensed_contig_41867	34	1302	TDU_consensed_contig_41867,TPO_consensed_contig_110781	.	+
TDU_consensed_contig_41868	2	2832	TDU_consensed_contig_41868,TPO_consensed_contig_38209	.	+
TDU_consensed_contig_41870	16	1592	TDU_consensed_contig_41870,TPO_consensed_contig_41247	.	+
TDU_consensed_contig_41874	157	2143	TDU_consensed_contig_41874,TPO_consensed_contig_43097	.	+
TDU_consensed_contig_41877	0	957	TDU_consensed_contig_41877,TPO_consensed_contig_39325	.	+
TDU_consensed_contig_41878	0	1122	TDU_consensed_contig_41878,TPO_consensed_contig_39659	.	+
TDU_consensed_contig_41881	15	2007	TDU_consensed_contig_41881,TPO_consensed_contig_44260	.	+
TDU_consensed_contig_41883	39	1132	TDU_consensed_contig_41883,TPO_consensed_contig_26421	.	+
TDU_consensed_contig_41884	0	2036	TDU_consensed_contig_41884,TPO_consensed_contig_19320	.	+
TDU_consensed_contig_41885	28	921	TDU_consensed_contig_41885,TPO_consensed_contig_107011	.	+
TDU_consensed_contig_41886	46	1281	TDU_consensed_contig_41886,TPO_consensed_contig_39398	.	+
TDU_consensed_contig_41891	1150	1853	TDU_consensed_contig_41891,TPO_consensed_contig_91809	.	+
TDU_consensed_contig_41897	2	1295	TDU_consensed_contig_41897,TPO_consensed_contig_27406	.	+
TDU_consensed_contig_41906	0	1557	TDU_consensed_contig_41906,TPO_consensed_contig_96813	.	+
TDU_consensed_contig_41907	465	1239	TDU_consensed_contig_41907,TPO_consensed_contig_70824	.	+
TDU_consensed_contig_41911	27	3054	TDU_consensed_contig_41911,TPO_consensed_contig_20395	.	+
TDU_consensed_contig_41912	15	793	TDU_consensed_contig_41912,TPO_consensed_contig_86173	.	+
TDU_consensed_contig_41914	0	1311	TDU_consensed_contig_41914,TPO_consensed_contig_4364	.	+
TDU_consensed_contig_41918	12	2515	TDU_consensed_contig_41918,TPO_consensed_contig_40597	.	+
TDU_consensed_contig_41920	21	948	TDU_consensed_contig_41920,TPO_consensed_contig_36919	.	+
TDU_consensed_contig_41933	0	686	TDU_consensed_contig_41933,TPO_consensed_contig_45448	.	+
TDU_consensed_contig_41935	3	1058	TDU_consensed_contig_41935,TPO_consensed_contig_46407	.	+
TDU_consensed_contig_41936	13	593	TDU_consensed_contig_41936,TPO_consensed_contig_108986	.	+
TDU_consensed_contig_41937	5	688	TDU_consensed_contig_41937,TPO_consensed_contig_19878	.	+
TDU_consensed_contig_41940	25	1799	TDU_consensed_contig_41940,TPO_consensed_contig_113360	.	+
TDU_consensed_contig_41942	22	2439	TDU_consensed_contig_41942,TPO_consensed_contig_11530	.	+
TDU_consensed_contig_41957	7	1329	TDU_consensed_contig_41957,TPO_consensed_contig_32161	.	+
TDU_consensed_contig_41960	0	502	TDU_consensed_contig_41960,TPO_consensed_contig_16015	.	+
TDU_consensed_contig_41962	17	1300	TDU_consensed_contig_41962,TPO_consensed_contig_102181	.	+
TDU_consensed_contig_41965	0	1814	TDU_consensed_contig_41965,TPO_consensed_contig_5973	.	+
TDU_consensed_contig_41966	176	2674	TDU_consensed_contig_41966,TPO_consensed_contig_35658	.	+
TDU_consensed_contig_41968	291	1782	TDU_consensed_contig_41968,TPO_consensed_contig_89848	.	+
TDU_consensed_contig_41970	1	1451	TDU_consensed_contig_41970,TPO_consensed_contig_103548	.	+
TDU_consensed_contig_41974	102	1571	TDU_consensed_contig_41974,TPO_consensed_contig_16801	.	+
TDU_consensed_contig_41979	0	992	TDU_consensed_contig_41979,TPO_consensed_contig_98026	.	+
TDU_consensed_contig_41985	242	1120	TDU_consensed_contig_41985,TPO_consensed_contig_63447	.	+
TDU_consensed_contig_41987	31	1953	TDU_consensed_contig_41987,TPO_consensed_contig_93259	.	+
TDU_consensed_contig_41988	1	1362	TDU_consensed_contig_41988,TPO_consensed_contig_69545	.	+
TDU_consensed_contig_41994	27	1727	TDU_consensed_contig_41994,TPO_consensed_contig_58814	.	+
TDU_consensed_contig_41995	650	2324	TDU_consensed_contig_41995,TPO_consensed_contig_3123	.	+
TDU_consensed_contig_41996	181	1592	TDU_consensed_contig_41996,TPO_consensed_contig_5905	.	+
TDU_consensed_contig_41998	0	1013	TDU_consensed_contig_41998,TPO_consensed_contig_39786	.	+
TDU_consensed_contig_41999	31	2349	TDU_consensed_contig_41999,TPO_consensed_contig_96066	.	+
TDU_consensed_contig_42009	0	1908	TDU_consensed_contig_42009,TPO_consensed_contig_16343	.	+
TDU_consensed_contig_42016	439	2856	TDU_consensed_contig_42016,TPO_consensed_contig_42023	.	+
TDU_consensed_contig_42019	0	780	TDU_consensed_contig_42019,TPO_consensed_contig_46752	.	+
TDU_consensed_contig_42020	0	983	TDU_consensed_contig_42020,TPO_consensed_contig_5934	.	+
TDU_consensed_contig_42034	0	2799	TDU_consensed_contig_42034,TPO_consensed_contig_8951	.	+
TDU_consensed_contig_42037	0	1376	TDU_consensed_contig_42037,TPO_consensed_contig_62985	.	+
TDU_consensed_contig_42041	0	666	TDU_consensed_contig_42041,TPO_consensed_contig_24508	.	+
TDU_consensed_contig_42042	0	1726	TDU_consensed_contig_42042,TPO_consensed_contig_116221	.	+
TDU_consensed_contig_42043	3	2853	TDU_consensed_contig_42043,TPO_consensed_contig_40517	.	+
TDU_consensed_contig_42046	1	3291	TDU_consensed_contig_42046,TPO_consensed_contig_97441	.	+
TDU_consensed_contig_42049	0	2690	TDU_consensed_contig_42049,TPO_consensed_contig_10789	.	+
TDU_consensed_contig_42051	0	4405	TDU_consensed_contig_42051,TPO_consensed_contig_11123	.	+
TDU_consensed_contig_42056	676	1526	TDU_consensed_contig_42056,TPO_consensed_contig_19183	.	+
TDU_consensed_contig_42064	76	1265	TDU_consensed_contig_42064,TPO_consensed_contig_42569	.	+
TDU_consensed_contig_42085	0	721	TDU_consensed_contig_42085,TPO_consensed_contig_39985	.	+
TDU_consensed_contig_42090	33	1797	TDU_consensed_contig_42090,TPO_consensed_contig_114129	.	+
TDU_consensed_contig_42093	22	1695	TDU_consensed_contig_42093,TPO_consensed_contig_62060	.	+
TDU_consensed_contig_42096	33	1870	TDU_consensed_contig_42096,TPO_consensed_contig_114121	.	+
TDU_consensed_contig_42097	1493	2241	TDU_consensed_contig_42097,TPO_consensed_contig_3121	.	+
TDU_consensed_contig_42098	23	2523	TDU_consensed_contig_42098,TPO_consensed_contig_33478	.	+
TDU_consensed_contig_42099	0	973	TDU_consensed_contig_42099,TPO_consensed_contig_97061	.	+
TDU_consensed_contig_42103	0	966	TDU_consensed_contig_42103,TPO_consensed_contig_90368	.	+
TDU_consensed_contig_42114	9	1362	TDU_consensed_contig_42114,TPO_consensed_contig_40547	.	+
TDU_consensed_contig_42116	61	1235	TDU_consensed_contig_42116,TPO_consensed_contig_113790	.	+
TDU_consensed_contig_42117	0	1542	TDU_consensed_contig_42117,TPO_consensed_contig_10534	.	+
TDU_consensed_contig_42120	2	1443	TDU_consensed_contig_42120,TPO_consensed_contig_42915	.	+
TDU_consensed_contig_42121	2	1949	TDU_consensed_contig_42121,TPO_consensed_contig_42916	.	+
TDU_consensed_contig_42123	123	1943	TDU_consensed_contig_42123,TPO_consensed_contig_39002	.	+
TDU_consensed_contig_42136	33	1221	TDU_consensed_contig_42136,TPO_consensed_contig_20609	.	+
TDU_consensed_contig_42146	2	532	TDU_consensed_contig_42146,TPO_consensed_contig_17048	.	+
TDU_consensed_contig_42147	481	1911	TDU_consensed_contig_42147,TPO_consensed_contig_113254	.	+
TDU_consensed_contig_42149	43	1640	TDU_consensed_contig_42149,TPO_consensed_contig_39701	.	+
TDU_consensed_contig_42151	43	1590	TDU_consensed_contig_42151,TPO_consensed_contig_39702	.	+
TDU_consensed_contig_42160	297	2469	TDU_consensed_contig_42160,TPO_consensed_contig_45188	.	+
TDU_consensed_contig_42164	54	1917	TDU_consensed_contig_42164,TPO_consensed_contig_38025	.	+
TDU_consensed_contig_42176	0	1910	TDU_consensed_contig_42176,TPO_consensed_contig_16561	.	+
TDU_consensed_contig_42181	33	1717	TDU_consensed_contig_42181,TPO_consensed_contig_23003	.	+
TDU_consensed_contig_42185	0	810	TDU_consensed_contig_42185,TPO_consensed_contig_95199	.	+
TDU_consensed_contig_42188	6	3303	TDU_consensed_contig_42188,TPO_consensed_contig_7611	.	+
TDU_consensed_contig_42193	4	746	TDU_consensed_contig_42193,TPO_consensed_contig_34655	.	+
TDU_consensed_contig_42194	1	2634	TDU_consensed_contig_42194,TPO_consensed_contig_18088	.	+
TDU_consensed_contig_42196	2	2121	TDU_consensed_contig_42196,TPO_consensed_contig_8645	.	+
TDU_consensed_contig_42204	83	1812	TDU_consensed_contig_42204,TPO_consensed_contig_23749	.	+
TDU_consensed_contig_42210	0	1203	TDU_consensed_contig_42210,TPO_consensed_contig_116348	.	+
TDU_consensed_contig_42212	36	1398	TDU_consensed_contig_42212,TPO_consensed_contig_59678	.	+
TDU_consensed_contig_42227	0	1205	TDU_consensed_contig_42227,TPO_consensed_contig_38422	.	+
TDU_consensed_contig_42234	41	703	TDU_consensed_contig_42234,TPO_consensed_contig_17003	.	+
TDU_consensed_contig_42248	1055	3152	TDU_consensed_contig_42248,TPO_consensed_contig_104478	.	+
TDU_consensed_contig_42252	22	4362	TDU_consensed_contig_42252,TPO_consensed_contig_113373	.	+
TDU_consensed_contig_42253	1005	3351	TDU_consensed_contig_42253,TPO_consensed_contig_37959	.	+
TDU_consensed_contig_42254	4	843	TDU_consensed_contig_42254,TPO_consensed_contig_69281	.	+
TDU_consensed_contig_42262	84	979	TDU_consensed_contig_42262,TPO_consensed_contig_46392	.	+
TDU_consensed_contig_42266	57	3312	TDU_consensed_contig_42266,TPO_consensed_contig_59269	.	+
TDU_consensed_contig_42267	14	3267	TDU_consensed_contig_42267,TPO_consensed_contig_35674	.	+
TDU_consensed_contig_42278	121	2053	TDU_consensed_contig_42278,TPO_consensed_contig_39976	.	+
TDU_consensed_contig_42279	121	1987	TDU_consensed_contig_42279,TPO_consensed_contig_39977	.	+
TDU_consensed_contig_42281	10	1461	TDU_consensed_contig_42281,TPO_consensed_contig_87718	.	+
TDU_consensed_contig_42282	6	1520	TDU_consensed_contig_42282,TPO_consensed_contig_19644	.	+
TDU_consensed_contig_42289	244	2383	TDU_consensed_contig_42289,TPO_consensed_contig_42589	.	+
TDU_consensed_contig_42290	0	910	TDU_consensed_contig_42290,TPO_consensed_contig_11320	.	+
TDU_consensed_contig_42301	5	2432	TDU_consensed_contig_42301,TPO_consensed_contig_19653	.	+
TDU_consensed_contig_42302	8	2691	TDU_consensed_contig_42302,TPO_consensed_contig_41692	.	+
TDU_consensed_contig_42304	29	2362	TDU_consensed_contig_42304,TPO_consensed_contig_21207	.	+
TDU_consensed_contig_42308	0	615	TDU_consensed_contig_42308,TPO_consensed_contig_43938	.	+
TDU_consensed_contig_42310	0	2421	TDU_consensed_contig_42310,TPO_consensed_contig_10364	.	+
TDU_consensed_contig_42320	0	909	TDU_consensed_contig_42320,TPO_consensed_contig_44181	.	+
TDU_consensed_contig_42321	25	2040	TDU_consensed_contig_42321,TPO_consensed_contig_46528	.	+
TDU_consensed_contig_42322	137	1188	TDU_consensed_contig_42322,TPO_consensed_contig_84873	.	+
TDU_consensed_contig_42329	93	889	TDU_consensed_contig_42329,TPO_consensed_contig_98736	.	+
TDU_consensed_contig_42338	25	593	TDU_consensed_contig_42338,TPO_consensed_contig_72379	.	+
TDU_consensed_contig_42345	24	951	TDU_consensed_contig_42345,TPO_consensed_contig_103740	.	+
TDU_consensed_contig_42353	49	809	TDU_consensed_contig_42353,TPO_consensed_contig_41078	.	+
TDU_consensed_contig_42358	5	1708	TDU_consensed_contig_42358,TPO_consensed_contig_22266	.	+
TDU_consensed_contig_42363	0	770	TDU_consensed_contig_42363,TPO_consensed_contig_35473	.	+
TDU_consensed_contig_42373	101	865	TDU_consensed_contig_42373,TPO_consensed_contig_21052	.	+
TDU_consensed_contig_42375	389	1078	TDU_consensed_contig_42375,TPO_consensed_contig_4676	.	+
TDU_consensed_contig_42382	28	2335	TDU_consensed_contig_42382,TPO_consensed_contig_18314	.	+
TDU_consensed_contig_42385	776	2346	TDU_consensed_contig_42385,TPO_consensed_contig_87868	.	+
TDU_consensed_contig_42386	87	1709	TDU_consensed_contig_42386,TPO_consensed_contig_106134	.	+
TDU_consensed_contig_42408	48	1313	TDU_consensed_contig_42408,TPO_consensed_contig_4659	.	+
TDU_consensed_contig_42426	899	1574	TDU_consensed_contig_42426,TPO_consensed_contig_14496	.	+
TDU_consensed_contig_42428	6	2507	TDU_consensed_contig_42428,TPO_consensed_contig_35985	.	+
TDU_consensed_contig_42435	220	2324	TDU_consensed_contig_42435,TPO_consensed_contig_107162	.	+
TDU_consensed_contig_42437	0	1918	TDU_consensed_contig_42437,TPO_consensed_contig_9582	.	+
TDU_consensed_contig_42443	134	1386	TDU_consensed_contig_42443,TPO_consensed_contig_11078	.	+
TDU_consensed_contig_42445	694	2958	TDU_consensed_contig_42445,TPO_consensed_contig_6180	.	+
TDU_consensed_contig_42448	12	1618	TDU_consensed_contig_42448,TPO_consensed_contig_36475	.	+
TDU_consensed_contig_42449	12	1284	TDU_consensed_contig_42449,TPO_consensed_contig_103278	.	+
TDU_consensed_contig_42454	0	2265	TDU_consensed_contig_42454,TPO_consensed_contig_42032	.	+
TDU_consensed_contig_42457	95	633	TDU_consensed_contig_42457,TPO_consensed_contig_82458	.	+
TDU_consensed_contig_42458	9	1241	TDU_consensed_contig_42458,TPO_consensed_contig_42610	.	+
TDU_consensed_contig_42463	259	942	TDU_consensed_contig_42463,TPO_consensed_contig_5072	.	+
TDU_consensed_contig_42468	0	924	TDU_consensed_contig_42468,TPO_consensed_contig_61277	.	+
TDU_consensed_contig_42471	0	1183	TDU_consensed_contig_42471,TPO_consensed_contig_61283	.	+
TDU_consensed_contig_42473	0	973	TDU_consensed_contig_42473,TPO_consensed_contig_61278	.	+
TDU_consensed_contig_42474	870	2813	TDU_consensed_contig_42474,TPO_consensed_contig_86134	.	+
TDU_consensed_contig_42483	623	2081	TDU_consensed_contig_42483,TPO_consensed_contig_73686	.	+
TDU_consensed_contig_42484	0	955	TDU_consensed_contig_42484,TPO_consensed_contig_40571	.	+
TDU_consensed_contig_42485	27	1749	TDU_consensed_contig_42485,TPO_consensed_contig_40573	.	+
TDU_consensed_contig_42486	4	910	TDU_consensed_contig_42486,TPO_consensed_contig_4994	.	+
TDU_consensed_contig_42502	0	1393	TDU_consensed_contig_42502,TPO_consensed_contig_61925	.	+
TDU_consensed_contig_42506	0	1174	TDU_consensed_contig_42506,TPO_consensed_contig_23105	.	+
TDU_consensed_contig_42521	648	1904	TDU_consensed_contig_42521,TPO_consensed_contig_27474	.	+
TDU_consensed_contig_42524	3	2927	TDU_consensed_contig_42524,TPO_consensed_contig_11011	.	+
TDU_consensed_contig_42529	15	2196	TDU_consensed_contig_42529,TPO_consensed_contig_41545	.	+
TDU_consensed_contig_42531	77	1204	TDU_consensed_contig_42531,TPO_consensed_contig_96504	.	+
TDU_consensed_contig_42541	23	767	TDU_consensed_contig_42541,TPO_consensed_contig_73196	.	+
TDU_consensed_contig_42543	665	2046	TDU_consensed_contig_42543,TPO_consensed_contig_44477	.	+
TDU_consensed_contig_42568	8	621	TDU_consensed_contig_42568,TPO_consensed_contig_107300	.	+
TDU_consensed_contig_42574	7	1635	TDU_consensed_contig_42574,TPO_consensed_contig_33274	.	+
TDU_consensed_contig_42575	290	3029	TDU_consensed_contig_42575,TPO_consensed_contig_113020	.	+
TDU_consensed_contig_42577	1062	1785	TDU_consensed_contig_42577,TPO_consensed_contig_49292	.	+
TDU_consensed_contig_42578	35	741	TDU_consensed_contig_42578,TPO_consensed_contig_43678	.	+
TDU_consensed_contig_42592	31	2314	TDU_consensed_contig_42592,TPO_consensed_contig_58850	.	+
TDU_consensed_contig_42596	74	874	TDU_consensed_contig_42596,TPO_consensed_contig_31573	.	+
TDU_consensed_contig_42597	36	608	TDU_consensed_contig_42597,TPO_consensed_contig_14150	.	+
TDU_consensed_contig_42598	9	2220	TDU_consensed_contig_42598,TPO_consensed_contig_6309	.	+
TDU_consensed_contig_42599	0	2161	TDU_consensed_contig_42599,TPO_consensed_contig_112520	.	+
TDU_consensed_contig_42606	19	1267	TDU_consensed_contig_42606,TPO_consensed_contig_107851	.	+
TDU_consensed_contig_42610	0	642	TDU_consensed_contig_42610,TPO_consensed_contig_62559	.	+
TDU_consensed_contig_42618	0	2045	TDU_consensed_contig_42618,TPO_consensed_contig_47287	.	+
TDU_consensed_contig_42625	92	1262	TDU_consensed_contig_42625,TPO_consensed_contig_35798	.	+
TDU_consensed_contig_42627	14	924	TDU_consensed_contig_42627,TPO_consensed_contig_83759	.	+
TDU_consensed_contig_42628	0	1994	TDU_consensed_contig_42628,TPO_consensed_contig_36131	.	+
TDU_consensed_contig_42631	8	1821	TDU_consensed_contig_42631,TPO_consensed_contig_96500	.	+
TDU_consensed_contig_42633	0	1408	TDU_consensed_contig_42633,TPO_consensed_contig_34865	.	+
TDU_consensed_contig_42636	18	1589	TDU_consensed_contig_42636,TPO_consensed_contig_36939	.	+
TDU_consensed_contig_42637	18	1660	TDU_consensed_contig_42637,TPO_consensed_contig_5010	.	+
TDU_consensed_contig_42640	13	1112	TDU_consensed_contig_42640,TPO_consensed_contig_16104	.	+
TDU_consensed_contig_42645	49	1592	TDU_consensed_contig_42645,TPO_consensed_contig_61750	.	+
TDU_consensed_contig_42647	58	1504	TDU_consensed_contig_42647,TPO_consensed_contig_32936	.	+
TDU_consensed_contig_42656	0	1727	TDU_consensed_contig_42656,TPO_consensed_contig_11257	.	+
TDU_consensed_contig_42657	3	2409	TDU_consensed_contig_42657,TPO_consensed_contig_73411	.	+
TDU_consensed_contig_42662	43	2045	TDU_consensed_contig_42662,TPO_consensed_contig_44145	.	+
TDU_consensed_contig_42669	142	2473	TDU_consensed_contig_42669,TPO_consensed_contig_25057	.	+
TDU_consensed_contig_42679	0	1340	TDU_consensed_contig_42679,TPO_consensed_contig_20278	.	+
TDU_consensed_contig_42683	15	908	TDU_consensed_contig_42683,TPO_consensed_contig_94053	.	+
TDU_consensed_contig_42684	8	1362	TDU_consensed_contig_42684,TPO_consensed_contig_43783	.	+
TDU_consensed_contig_42691	55	2033	TDU_consensed_contig_42691,TPO_consensed_contig_24184	.	+
TDU_consensed_contig_42692	1	964	TDU_consensed_contig_42692,TPO_consensed_contig_5967	.	+
TDU_consensed_contig_42700	17	1289	TDU_consensed_contig_42700,TPO_consensed_contig_59648	.	+
TDU_consensed_contig_42701	17	1238	TDU_consensed_contig_42701,TPO_consensed_contig_59655	.	+
TDU_consensed_contig_42702	17	1307	TDU_consensed_contig_42702,TPO_consensed_contig_7571	.	+
TDU_consensed_contig_42703	17	1203	TDU_consensed_contig_42703,TPO_consensed_contig_59645	.	+
TDU_consensed_contig_42707	23	2130	TDU_consensed_contig_42707,TPO_consensed_contig_104531	.	+
TDU_consensed_contig_42709	151	2207	TDU_consensed_contig_42709,TPO_consensed_contig_96933	.	+
TDU_consensed_contig_42712	236	2522	TDU_consensed_contig_42712,TPO_consensed_contig_96695	.	+
TDU_consensed_contig_42738	0	718	TDU_consensed_contig_42738,TPO_consensed_contig_116762	.	+
TDU_consensed_contig_42762	0	1245	TDU_consensed_contig_42762,TPO_consensed_contig_41090	.	+
TDU_consensed_contig_42764	19	1213	TDU_consensed_contig_42764,TPO_consensed_contig_109932	.	+
TDU_consensed_contig_42777	23	870	TDU_consensed_contig_42777,TPO_consensed_contig_39927	.	+
TDU_consensed_contig_42780	0	523	TDU_consensed_contig_42780,TPO_consensed_contig_46483	.	+
TDU_consensed_contig_42782	97	1078	TDU_consensed_contig_42782,TPO_consensed_contig_98690	.	+
TDU_consensed_contig_42784	0	1078	TDU_consensed_contig_42784,TPO_consensed_contig_21312	.	+
TDU_consensed_contig_42793	0	591	TDU_consensed_contig_42793,TPO_consensed_contig_11399	.	+
TDU_consensed_contig_42800	0	2426	TDU_consensed_contig_42800,TPO_consensed_contig_44279	.	+
TDU_consensed_contig_42801	0	1781	TDU_consensed_contig_42801,TPO_consensed_contig_36072	.	+
TDU_consensed_contig_42802	0	2467	TDU_consensed_contig_42802,TPO_consensed_contig_66109	.	+
TDU_consensed_contig_42808	15	923	TDU_consensed_contig_42808,TPO_consensed_contig_67500	.	+
TDU_consensed_contig_42818	0	1324	TDU_consensed_contig_42818,TPO_consensed_contig_73191	.	+
TDU_consensed_contig_42820	1	3325	TDU_consensed_contig_42820,TPO_consensed_contig_6290	.	+
TDU_consensed_contig_42821	0	5388	TDU_consensed_contig_42821,TPO_consensed_contig_9566	.	+
TDU_consensed_contig_42824	1160	1984	TDU_consensed_contig_42824,TPO_consensed_contig_100289	.	+
TDU_consensed_contig_42831	265	2038	TDU_consensed_contig_42831,TPO_consensed_contig_16041	.	+
TDU_consensed_contig_42841	457	1204	TDU_consensed_contig_42841,TPO_consensed_contig_37638	.	+
TDU_consensed_contig_42859	171	3744	TDU_consensed_contig_42859,TPO_consensed_contig_36051	.	+
TDU_consensed_contig_42860	108	1589	TDU_consensed_contig_42860,TPO_consensed_contig_39841	.	+
TDU_consensed_contig_42861	27	2204	TDU_consensed_contig_42861,TPO_consensed_contig_38156	.	+
TDU_consensed_contig_42867	9	1156	TDU_consensed_contig_42867,TPO_consensed_contig_45463	.	+
TDU_consensed_contig_42868	11	897	TDU_consensed_contig_42868,TPO_consensed_contig_40103	.	+
TDU_consensed_contig_42875	54	1469	TDU_consensed_contig_42875,TPO_consensed_contig_27702	.	+
TDU_consensed_contig_42878	221	1118	TDU_consensed_contig_42878,TPO_consensed_contig_42722	.	+
TDU_consensed_contig_42879	38	1920	TDU_consensed_contig_42879,TPO_consensed_contig_23089	.	+
TDU_consensed_contig_42882	8	1887	TDU_consensed_contig_42882,TPO_consensed_contig_44086	.	+
TDU_consensed_contig_42884	48	3009	TDU_consensed_contig_42884,TPO_consensed_contig_12390	.	+
TDU_consensed_contig_42886	111	964	TDU_consensed_contig_42886,TPO_consensed_contig_91192	.	+
TDU_consensed_contig_42901	204	838	TDU_consensed_contig_42901,TPO_consensed_contig_38731	.	+
TDU_consensed_contig_42908	53	2188	TDU_consensed_contig_42908,TPO_consensed_contig_35846	.	+
TDU_consensed_contig_42921	0	2764	TDU_consensed_contig_42921,TPO_consensed_contig_59023	.	+
TDU_consensed_contig_42936	460	1979	TDU_consensed_contig_42936,TPO_consensed_contig_19511	.	+
TDU_consensed_contig_42950	0	1099	TDU_consensed_contig_42950,TPO_consensed_contig_85521	.	+
TDU_consensed_contig_42954	8	1274	TDU_consensed_contig_42954,TPO_consensed_contig_46055	.	+
TDU_consensed_contig_42958	10	1770	TDU_consensed_contig_42958,TPO_consensed_contig_35805	.	+
TDU_consensed_contig_42964	3	3509	TDU_consensed_contig_42964,TPO_consensed_contig_71481	.	+
TDU_consensed_contig_42979	0	921	TDU_consensed_contig_42979,TPO_consensed_contig_94111	.	+
TDU_consensed_contig_42981	99	3837	TDU_consensed_contig_42981,TPO_consensed_contig_98103	.	+
TDU_consensed_contig_42985	0	685	TDU_consensed_contig_42985,TPO_consensed_contig_107285	.	+
TDU_consensed_contig_42989	526	2159	TDU_consensed_contig_42989,TPO_consensed_contig_37013	.	+
TDU_consensed_contig_42990	0	1905	TDU_consensed_contig_42990,TPO_consensed_contig_18748	.	+
TDU_consensed_contig_42996	215	1268	TDU_consensed_contig_42996,TPO_consensed_contig_73672	.	+
TDU_consensed_contig_43001	231	877	TDU_consensed_contig_43001,TPO_consensed_contig_27556	.	+
TDU_consensed_contig_43004	129	1347	TDU_consensed_contig_43004,TPO_consensed_contig_42010	.	+
TDU_consensed_contig_43005	53	655	TDU_consensed_contig_43005,TPO_consensed_contig_16768	.	+
TDU_consensed_contig_43006	0	696	TDU_consensed_contig_43006,TPO_consensed_contig_85516	.	+
TDU_consensed_contig_43009	49	5442	TDU_consensed_contig_43009,TPO_consensed_contig_113664	.	+
TDU_consensed_contig_43010	109	4117	TDU_consensed_contig_43010,TPO_consensed_contig_71235	.	+
TDU_consensed_contig_43015	29	1484	TDU_consensed_contig_43015,TPO_consensed_contig_18645	.	+
TDU_consensed_contig_43037	0	1516	TDU_consensed_contig_43037,TPO_consensed_contig_94544	.	+
TDU_consensed_contig_43043	0	849	TDU_consensed_contig_43043,TPO_consensed_contig_40403	.	+
TDU_consensed_contig_43046	3	847	TDU_consensed_contig_43046,TPO_consensed_contig_8762	.	+
TDU_consensed_contig_43053	0	3662	TDU_consensed_contig_43053,TPO_consensed_contig_18842	.	+
TDU_consensed_contig_43098	9	1937	TDU_consensed_contig_43098,TPO_consensed_contig_21841	.	+
TDU_consensed_contig_43101	254	3079	TDU_consensed_contig_43101,TPO_consensed_contig_43448	.	+
TDU_consensed_contig_43103	52	1645	TDU_consensed_contig_43103,TPO_consensed_contig_35358	.	+
TDU_consensed_contig_43107	1	506	TDU_consensed_contig_43107,TPO_consensed_contig_23523	.	+
TDU_consensed_contig_43109	5	1242	TDU_consensed_contig_43109,TPO_consensed_contig_18202	.	+
TDU_consensed_contig_43124	107	3110	TDU_consensed_contig_43124,TPO_consensed_contig_40388	.	+
TDU_consensed_contig_43131	1	623	TDU_consensed_contig_43131,TPO_consensed_contig_20409	.	+
TDU_consensed_contig_43134	201	2708	TDU_consensed_contig_43134,TPO_consensed_contig_41503	.	+
TDU_consensed_contig_43142	13	1604	TDU_consensed_contig_43142,TPO_consensed_contig_93857	.	+
TDU_consensed_contig_43151	13	2270	TDU_consensed_contig_43151,TPO_consensed_contig_59204	.	+
TDU_consensed_contig_43152	0	565	TDU_consensed_contig_43152,TPO_consensed_contig_91548	.	+
TDU_consensed_contig_43159	137	841	TDU_consensed_contig_43159,TPO_consensed_contig_34883	.	+
TDU_consensed_contig_43160	20	1186	TDU_consensed_contig_43160,TPO_consensed_contig_12943	.	+
TDU_consensed_contig_43182	81	763	TDU_consensed_contig_43182,TPO_consensed_contig_40819	.	+
TDU_consensed_contig_43184	104	1481	TDU_consensed_contig_43184,TPO_consensed_contig_109643	.	+
TDU_consensed_contig_43202	9	1200	TDU_consensed_contig_43202,TPO_consensed_contig_3727	.	+
TDU_consensed_contig_43208	0	1420	TDU_consensed_contig_43208,TPO_consensed_contig_18884	.	+
TDU_consensed_contig_43215	5	849	TDU_consensed_contig_43215,TPO_consensed_contig_57040	.	+
TDU_consensed_contig_43219	15	564	TDU_consensed_contig_43219,TPO_consensed_contig_106332	.	+
TDU_consensed_contig_43220	15	1562	TDU_consensed_contig_43220,TPO_consensed_contig_97756	.	+
TDU_consensed_contig_43232	0	898	TDU_consensed_contig_43232,TPO_consensed_contig_20834	.	+
TDU_consensed_contig_43235	28	684	TDU_consensed_contig_43235,TPO_consensed_contig_91820	.	+
TDU_consensed_contig_43236	28	1005	TDU_consensed_contig_43236,TPO_consensed_contig_91821	.	+
TDU_consensed_contig_43237	28	1186	TDU_consensed_contig_43237,TPO_consensed_contig_71005	.	+
TDU_consensed_contig_43238	28	800	TDU_consensed_contig_43238,TPO_consensed_contig_71009	.	+
TDU_consensed_contig_43239	310	1687	TDU_consensed_contig_43239,TPO_consensed_contig_71006	.	+
TDU_consensed_contig_43240	0	736	TDU_consensed_contig_43240,TPO_consensed_contig_39352	.	+
TDU_consensed_contig_43244	3	1420	TDU_consensed_contig_43244,TPO_consensed_contig_95333	.	+
TDU_consensed_contig_43245	3	1574	TDU_consensed_contig_43245,TPO_consensed_contig_95332	.	+
TDU_consensed_contig_43255	1320	2203	TDU_consensed_contig_43255,TPO_consensed_contig_31270	.	+
TDU_consensed_contig_43259	126	1240	TDU_consensed_contig_43259,TPO_consensed_contig_37345	.	+
TDU_consensed_contig_43267	318	1452	TDU_consensed_contig_43267,TPO_consensed_contig_59370	.	+
TDU_consensed_contig_43280	0	2148	TDU_consensed_contig_43280,TPO_consensed_contig_3592	.	+
TDU_consensed_contig_43291	57	1205	TDU_consensed_contig_43291,TPO_consensed_contig_27812	.	+
TDU_consensed_contig_43304	0	752	TDU_consensed_contig_43304,TPO_consensed_contig_83226	.	+
TDU_consensed_contig_43308	1457	2214	TDU_consensed_contig_43308,TPO_consensed_contig_99147	.	+
TDU_consensed_contig_43312	54	1003	TDU_consensed_contig_43312,TPO_consensed_contig_35082	.	+
TDU_consensed_contig_43313	14	602	TDU_consensed_contig_43313,TPO_consensed_contig_3101	.	+
TDU_consensed_contig_43315	1	2202	TDU_consensed_contig_43315,TPO_consensed_contig_41226	.	+
TDU_consensed_contig_43318	1025	2777	TDU_consensed_contig_43318,TPO_consensed_contig_41341	.	+
TDU_consensed_contig_43320	10	4360	TDU_consensed_contig_43320,TPO_consensed_contig_41653	.	+
TDU_consensed_contig_43326	0	851	TDU_consensed_contig_43326,TPO_consensed_contig_20643	.	+
TDU_consensed_contig_43337	25	1103	TDU_consensed_contig_43337,TPO_consensed_contig_59385	.	+
TDU_consensed_contig_43352	20	3714	TDU_consensed_contig_43352,TPO_consensed_contig_41230	.	+
TDU_consensed_contig_43353	0	1295	TDU_consensed_contig_43353,TPO_consensed_contig_34953	.	+
TDU_consensed_contig_43360	8	2160	TDU_consensed_contig_43360,TPO_consensed_contig_25768	.	+
TDU_consensed_contig_43373	194	701	TDU_consensed_contig_43373,TPO_consensed_contig_28294	.	+
TDU_consensed_contig_43376	197	2298	TDU_consensed_contig_43376,TPO_consensed_contig_6240	.	+
TDU_consensed_contig_43377	64	3442	TDU_consensed_contig_43377,TPO_consensed_contig_96166	.	+
TDU_consensed_contig_43382	19	1837	TDU_consensed_contig_43382,TPO_consensed_contig_36381	.	+
TDU_consensed_contig_43384	4	1454	TDU_consensed_contig_43384,TPO_consensed_contig_5319	.	+
TDU_consensed_contig_43392	84	2083	TDU_consensed_contig_43392,TPO_consensed_contig_98279	.	+
TDU_consensed_contig_43395	14	625	TDU_consensed_contig_43395,TPO_consensed_contig_36164	.	+
TDU_consensed_contig_43401	0	706	TDU_consensed_contig_43401,TPO_consensed_contig_45044	.	+
TDU_consensed_contig_43404	174	3069	TDU_consensed_contig_43404,TPO_consensed_contig_10230	.	+
TDU_consensed_contig_43407	8	881	TDU_consensed_contig_43407,TPO_consensed_contig_9824	.	+
TDU_consensed_contig_43414	258	1529	TDU_consensed_contig_43414,TPO_consensed_contig_12133	.	+
TDU_consensed_contig_43420	130	1632	TDU_consensed_contig_43420,TPO_consensed_contig_18453	.	+
TDU_consensed_contig_43421	8	1190	TDU_consensed_contig_43421,TPO_consensed_contig_10348	.	+
TDU_consensed_contig_43426	2	1309	TDU_consensed_contig_43426,TPO_consensed_contig_58689	.	+
TDU_consensed_contig_43428	6	2096	TDU_consensed_contig_43428,TPO_consensed_contig_58416	.	+
TDU_consensed_contig_43441	0	1043	TDU_consensed_contig_43441,TPO_consensed_contig_113338	.	+
TDU_consensed_contig_43442	0	1012	TDU_consensed_contig_43442,TPO_consensed_contig_113336	.	+
TDU_consensed_contig_43461	60	1276	TDU_consensed_contig_43461,TPO_consensed_contig_63957	.	+
TDU_consensed_contig_43468	9	502	TDU_consensed_contig_43468,TPO_consensed_contig_41389	.	+
TDU_consensed_contig_43473	716	1273	TDU_consensed_contig_43473,TPO_consensed_contig_90347	.	+
TDU_consensed_contig_43477	320	901	TDU_consensed_contig_43477,TPO_consensed_contig_48287	.	+
TDU_consensed_contig_43485	1	1403	TDU_consensed_contig_43485,TPO_consensed_contig_39193	.	+
TDU_consensed_contig_43486	2	1271	TDU_consensed_contig_43486,TPO_consensed_contig_94458	.	+
TDU_consensed_contig_43489	8	1416	TDU_consensed_contig_43489,TPO_consensed_contig_87635	.	+
TDU_consensed_contig_43490	8	1313	TDU_consensed_contig_43490,TPO_consensed_contig_87636	.	+
TDU_consensed_contig_43491	8	1153	TDU_consensed_contig_43491,TPO_consensed_contig_108088	.	+
TDU_consensed_contig_43506	1	832	TDU_consensed_contig_43506,TPO_consensed_contig_63484	.	+
TDU_consensed_contig_43516	26	1382	TDU_consensed_contig_43516,TPO_consensed_contig_11425	.	+
TDU_consensed_contig_43518	1	2011	TDU_consensed_contig_43518,TPO_consensed_contig_41080	.	+
TDU_consensed_contig_43530	119	1564	TDU_consensed_contig_43530,TPO_consensed_contig_19902	.	+
TDU_consensed_contig_43533	10	1267	TDU_consensed_contig_43533,TPO_consensed_contig_41624	.	+
TDU_consensed_contig_43551	186	2016	TDU_consensed_contig_43551,TPO_consensed_contig_113294	.	+
TDU_consensed_contig_43557	0	513	TDU_consensed_contig_43557,TPO_consensed_contig_65568	.	+
TDU_consensed_contig_43569	6	1880	TDU_consensed_contig_43569,TPO_consensed_contig_41646	.	+
TDU_consensed_contig_43572	0	1218	TDU_consensed_contig_43572,TPO_consensed_contig_85206	.	+
TDU_consensed_contig_43620	274	2803	TDU_consensed_contig_43620,TPO_consensed_contig_3843	.	+
TDU_consensed_contig_43630	4	1412	TDU_consensed_contig_43630,TPO_consensed_contig_33413	.	+
TDU_consensed_contig_43634	0	928	TDU_consensed_contig_43634,TPO_consensed_contig_113332	.	+
TDU_consensed_contig_43639	224	1049	TDU_consensed_contig_43639,TPO_consensed_contig_4927	.	+
TDU_consensed_contig_43649	42	729	TDU_consensed_contig_43649,TPO_consensed_contig_22832	.	+
TDU_consensed_contig_43659	0	1147	TDU_consensed_contig_43659,TPO_consensed_contig_17724	.	+
TDU_consensed_contig_43661	6	751	TDU_consensed_contig_43661,TPO_consensed_contig_41164	.	+
TDU_consensed_contig_43663	414	949	TDU_consensed_contig_43663,TPO_consensed_contig_51821	.	+
TDU_consensed_contig_43676	0	702	TDU_consensed_contig_43676,TPO_consensed_contig_42489	.	+
TDU_consensed_contig_43677	0	2101	TDU_consensed_contig_43677,TPO_consensed_contig_60056	.	+
TDU_consensed_contig_43684	7	1398	TDU_consensed_contig_43684,TPO_consensed_contig_71099	.	+
TDU_consensed_contig_43686	8	852	TDU_consensed_contig_43686,TPO_consensed_contig_17158	.	+
TDU_consensed_contig_43692	12	1232	TDU_consensed_contig_43692,TPO_consensed_contig_115516	.	+
TDU_consensed_contig_43707	1	968	TDU_consensed_contig_43707,TPO_consensed_contig_13056	.	+
TDU_consensed_contig_43708	1	861	TDU_consensed_contig_43708,TPO_consensed_contig_65056	.	+
TDU_consensed_contig_43711	21	2142	TDU_consensed_contig_43711,TPO_consensed_contig_36007	.	+
TDU_consensed_contig_43714	0	2246	TDU_consensed_contig_43714,TPO_consensed_contig_88007	.	+
TDU_consensed_contig_43746	32	2067	TDU_consensed_contig_43746,TPO_consensed_contig_35856	.	+
TDU_consensed_contig_43747	2	559	TDU_consensed_contig_43747,TPO_consensed_contig_32528	.	+
TDU_consensed_contig_43749	913	1747	TDU_consensed_contig_43749,TPO_consensed_contig_38099	.	+
TDU_consensed_contig_43752	0	741	TDU_consensed_contig_43752,TPO_consensed_contig_24771	.	+
TDU_consensed_contig_43762	10	3401	TDU_consensed_contig_43762,TPO_consensed_contig_22860	.	+
TDU_consensed_contig_43764	171	2458	TDU_consensed_contig_43764,TPO_consensed_contig_10970	.	+
TDU_consensed_contig_43765	0	2853	TDU_consensed_contig_43765,TPO_consensed_contig_110599	.	+
TDU_consensed_contig_43767	0	1761	TDU_consensed_contig_43767,TPO_consensed_contig_5840	.	+
TDU_consensed_contig_43785	0	674	TDU_consensed_contig_43785,TPO_consensed_contig_45150	.	+
TDU_consensed_contig_43793	9	2115	TDU_consensed_contig_43793,TPO_consensed_contig_9730	.	+
TDU_consensed_contig_43796	5	761	TDU_consensed_contig_43796,TPO_consensed_contig_71372	.	+
TDU_consensed_contig_43810	1	1984	TDU_consensed_contig_43810,TPO_consensed_contig_37741	.	+
TDU_consensed_contig_43817	9	1515	TDU_consensed_contig_43817,TPO_consensed_contig_20052	.	+
TDU_consensed_contig_43823	23	1428	TDU_consensed_contig_43823,TPO_consensed_contig_17444	.	+
TDU_consensed_contig_43837	76	658	TDU_consensed_contig_43837,TPO_consensed_contig_40455	.	+
TDU_consensed_contig_43843	165	2149	TDU_consensed_contig_43843,TPO_consensed_contig_34248	.	+
TDU_consensed_contig_43847	0	906	TDU_consensed_contig_43847,TPO_consensed_contig_42803	.	+
TDU_consensed_contig_43854	1	1499	TDU_consensed_contig_43854,TPO_consensed_contig_12750	.	+
TDU_consensed_contig_43859	3	1033	TDU_consensed_contig_43859,TPO_consensed_contig_69311	.	+
TDU_consensed_contig_43890	54	2048	TDU_consensed_contig_43890,TPO_consensed_contig_8887	.	+
TDU_consensed_contig_43892	339	1627	TDU_consensed_contig_43892,TPO_consensed_contig_16434	.	+
TDU_consensed_contig_43895	0	1858	TDU_consensed_contig_43895,TPO_consensed_contig_17328	.	+
TDU_consensed_contig_43904	23	1622	TDU_consensed_contig_43904,TPO_consensed_contig_32620	.	+
TDU_consensed_contig_43906	77	880	TDU_consensed_contig_43906,TPO_consensed_contig_37670	.	+
TDU_consensed_contig_43915	159	1929	TDU_consensed_contig_43915,TPO_consensed_contig_107098	.	+
TDU_consensed_contig_43934	115	843	TDU_consensed_contig_43934,TPO_consensed_contig_11916	.	+
TDU_consensed_contig_43946	1	1961	TDU_consensed_contig_43946,TPO_consensed_contig_61032	.	+
TDU_consensed_contig_43953	0	2331	TDU_consensed_contig_43953,TPO_consensed_contig_46507	.	+
TDU_consensed_contig_43955	0	1096	TDU_consensed_contig_43955,TPO_consensed_contig_46467	.	+
TDU_consensed_contig_43961	18	1505	TDU_consensed_contig_43961,TPO_consensed_contig_38427	.	+
TDU_consensed_contig_43962	7	4059	TDU_consensed_contig_43962,TPO_consensed_contig_97195	.	+
TDU_consensed_contig_43976	13	951	TDU_consensed_contig_43976,TPO_consensed_contig_19544	.	+
TDU_consensed_contig_43978	6	1432	TDU_consensed_contig_43978,TPO_consensed_contig_69725	.	+
TDU_consensed_contig_43980	290	1061	TDU_consensed_contig_43980,TPO_consensed_contig_93214	.	+
TDU_consensed_contig_43987	151	786	TDU_consensed_contig_43987,TPO_consensed_contig_24953	.	+
TDU_consensed_contig_43988	17	2070	TDU_consensed_contig_43988,TPO_consensed_contig_10902	.	+
TDU_consensed_contig_44002	69	975	TDU_consensed_contig_44002,TPO_consensed_contig_89491	.	+
TDU_consensed_contig_44015	18	650	TDU_consensed_contig_44015,TPO_consensed_contig_48712	.	+
TDU_consensed_contig_44019	22	1078	TDU_consensed_contig_44019,TPO_consensed_contig_89005	.	+
TDU_consensed_contig_44031	16	534	TDU_consensed_contig_44031,TPO_consensed_contig_113924	.	+
TDU_consensed_contig_44035	21	646	TDU_consensed_contig_44035,TPO_consensed_contig_25726	.	+
TDU_consensed_contig_44038	429	1639	TDU_consensed_contig_44038,TPO_consensed_contig_98449	.	+
TDU_consensed_contig_44066	1	1678	TDU_consensed_contig_44066,TPO_consensed_contig_70258	.	+
TDU_consensed_contig_44084	28	910	TDU_consensed_contig_44084,TPO_consensed_contig_96076	.	+
TDU_consensed_contig_44099	0	1554	TDU_consensed_contig_44099,TPO_consensed_contig_34929	.	+
TDU_consensed_contig_44163	15	1960	TDU_consensed_contig_44163,TPO_consensed_contig_8791	.	+
TDU_consensed_contig_44165	29	1461	TDU_consensed_contig_44165,TPO_consensed_contig_41795	.	+
TDU_consensed_contig_44172	13	3298	TDU_consensed_contig_44172,TPO_consensed_contig_26992	.	+
TDU_consensed_contig_44178	51	1126	TDU_consensed_contig_44178,TPO_consensed_contig_105189	.	+
TDU_consensed_contig_44179	66	1188	TDU_consensed_contig_44179,TPO_consensed_contig_98693	.	+
TDU_consensed_contig_44189	36	4207	TDU_consensed_contig_44189,TPO_consensed_contig_11809	.	+
TDU_consensed_contig_44193	11	679	TDU_consensed_contig_44193,TPO_consensed_contig_34282	.	+
TDU_consensed_contig_44203	0	732	TDU_consensed_contig_44203,TPO_consensed_contig_16011	.	+
TDU_consensed_contig_44219	2	2205	TDU_consensed_contig_44219,TPO_consensed_contig_104253	.	+
TDU_consensed_contig_44221	83	2301	TDU_consensed_contig_44221,TPO_consensed_contig_58622	.	+
TDU_consensed_contig_44229	0	2303	TDU_consensed_contig_44229,TPO_consensed_contig_40502	.	+
TDU_consensed_contig_44230	0	510	TDU_consensed_contig_44230,TPO_consensed_contig_92949	.	+
TDU_consensed_contig_44231	0	2230	TDU_consensed_contig_44231,TPO_consensed_contig_18360	.	+
TDU_consensed_contig_44247	0	1558	TDU_consensed_contig_44247,TPO_consensed_contig_24584	.	+
TDU_consensed_contig_44249	22	911	TDU_consensed_contig_44249,TPO_consensed_contig_39705	.	+
TDU_consensed_contig_44250	81	1559	TDU_consensed_contig_44250,TPO_consensed_contig_61881	.	+
TDU_consensed_contig_44255	49	1392	TDU_consensed_contig_44255,TPO_consensed_contig_116115	.	+
TDU_consensed_contig_44270	0	636	TDU_consensed_contig_44270,TPO_consensed_contig_43923	.	+
TDU_consensed_contig_44276	288	1542	TDU_consensed_contig_44276,TPO_consensed_contig_92648	.	+
TDU_consensed_contig_44278	0	1113	TDU_consensed_contig_44278,TPO_consensed_contig_18007	.	+
TDU_consensed_contig_44284	0	546	TDU_consensed_contig_44284,TPO_consensed_contig_95136	.	+
TDU_consensed_contig_44285	0	543	TDU_consensed_contig_44285,TPO_consensed_contig_3924	.	+
TDU_consensed_contig_44298	235	988	TDU_consensed_contig_44298,TPO_consensed_contig_91279	.	+
TDU_consensed_contig_44302	42	7109	TDU_consensed_contig_44302,TPO_consensed_contig_12235	.	+
TDU_consensed_contig_44304	0	1913	TDU_consensed_contig_44304,TPO_consensed_contig_32914	.	+
TDU_consensed_contig_44308	0	561	TDU_consensed_contig_44308,TPO_consensed_contig_22196	.	+
TDU_consensed_contig_44309	50	819	TDU_consensed_contig_44309,TPO_consensed_contig_43133	.	+
TDU_consensed_contig_44313	0	2211	TDU_consensed_contig_44313,TPO_consensed_contig_102613	.	+
TDU_consensed_contig_44314	5	2184	TDU_consensed_contig_44314,TPO_consensed_contig_27558	.	+
TDU_consensed_contig_44331	0	500	TDU_consensed_contig_44331,TPO_consensed_contig_39274	.	+
TDU_consensed_contig_44335	0	2787	TDU_consensed_contig_44335,TPO_consensed_contig_12078	.	+
TDU_consensed_contig_44343	0	530	TDU_consensed_contig_44343,TPO_consensed_contig_12564	.	+
TDU_consensed_contig_44350	0	652	TDU_consensed_contig_44350,TPO_consensed_contig_13340	.	+
TDU_consensed_contig_44356	33	1796	TDU_consensed_contig_44356,TPO_consensed_contig_31349	.	+
TDU_consensed_contig_44387	143	2176	TDU_consensed_contig_44387,TPO_consensed_contig_37794	.	+
TDU_consensed_contig_44388	19	1598	TDU_consensed_contig_44388,TPO_consensed_contig_35350	.	+
TDU_consensed_contig_44394	0	1774	TDU_consensed_contig_44394,TPO_consensed_contig_35529	.	+
TDU_consensed_contig_44398	14	628	TDU_consensed_contig_44398,TPO_consensed_contig_92843	.	+
TDU_consensed_contig_44406	23	2871	TDU_consensed_contig_44406,TPO_consensed_contig_41292	.	+
TDU_consensed_contig_44410	0	1494	TDU_consensed_contig_44410,TPO_consensed_contig_33528	.	+
TDU_consensed_contig_44413	15	2246	TDU_consensed_contig_44413,TPO_consensed_contig_34441	.	+
TDU_consensed_contig_44414	211	714	TDU_consensed_contig_44414,TPO_consensed_contig_88553	.	+
TDU_consensed_contig_44415	55	721	TDU_consensed_contig_44415,TPO_consensed_contig_37403	.	+
TDU_consensed_contig_44429	10	688	TDU_consensed_contig_44429,TPO_consensed_contig_28015	.	+
TDU_consensed_contig_44431	20	800	TDU_consensed_contig_44431,TPO_consensed_contig_111840	.	+
TDU_consensed_contig_44434	1	1489	TDU_consensed_contig_44434,TPO_consensed_contig_114576	.	+
TDU_consensed_contig_44442	61	2993	TDU_consensed_contig_44442,TPO_consensed_contig_68464	.	+
TDU_consensed_contig_44450	7	2203	TDU_consensed_contig_44450,TPO_consensed_contig_19944	.	+
TDU_consensed_contig_44458	307	2074	TDU_consensed_contig_44458,TPO_consensed_contig_42261	.	+
TDU_consensed_contig_44459	0	849	TDU_consensed_contig_44459,TPO_consensed_contig_87458	.	+
TDU_consensed_contig_44464	1	1211	TDU_consensed_contig_44464,TPO_consensed_contig_42671	.	+
TDU_consensed_contig_44469	341	1253	TDU_consensed_contig_44469,TPO_consensed_contig_35553	.	+
TDU_consensed_contig_44484	165	1010	TDU_consensed_contig_44484,TPO_consensed_contig_21913	.	+
TDU_consensed_contig_44498	100	1617	TDU_consensed_contig_44498,TPO_consensed_contig_106257	.	+
TDU_consensed_contig_44500	100	1515	TDU_consensed_contig_44500,TPO_consensed_contig_106258	.	+
TDU_consensed_contig_44505	14	1613	TDU_consensed_contig_44505,TPO_consensed_contig_42547	.	+
TDU_consensed_contig_44506	14	1735	TDU_consensed_contig_44506,TPO_consensed_contig_60272	.	+
TDU_consensed_contig_44507	27	1231	TDU_consensed_contig_44507,TPO_consensed_contig_34272	.	+
TDU_consensed_contig_44522	1	1216	TDU_consensed_contig_44522,TPO_consensed_contig_41552	.	+
TDU_consensed_contig_44533	25	884	TDU_consensed_contig_44533,TPO_consensed_contig_16576	.	+
TDU_consensed_contig_44539	36	1897	TDU_consensed_contig_44539,TPO_consensed_contig_107527	.	+
TDU_consensed_contig_44552	7	2255	TDU_consensed_contig_44552,TPO_consensed_contig_97036	.	+
TDU_consensed_contig_44553	33	970	TDU_consensed_contig_44553,TPO_consensed_contig_43957	.	+
TDU_consensed_contig_44562	1167	1731	TDU_consensed_contig_44562,TPO_consensed_contig_47064	.	+
TDU_consensed_contig_44568	235	1713	TDU_consensed_contig_44568,TPO_consensed_contig_112873	.	+
TDU_consensed_contig_44582	489	1044	TDU_consensed_contig_44582,TPO_consensed_contig_82542	.	+
TDU_consensed_contig_44589	0	1594	TDU_consensed_contig_44589,TPO_consensed_contig_11471	.	+
TDU_consensed_contig_44590	42	2813	TDU_consensed_contig_44590,TPO_consensed_contig_39580	.	+
TDU_consensed_contig_44603	0	853	TDU_consensed_contig_44603,TPO_consensed_contig_98335	.	+
TDU_consensed_contig_44606	83	1167	TDU_consensed_contig_44606,TPO_consensed_contig_60573	.	+
TDU_consensed_contig_44613	9	2554	TDU_consensed_contig_44613,TPO_consensed_contig_28113	.	+
TDU_consensed_contig_44635	0	725	TDU_consensed_contig_44635,TPO_consensed_contig_38896	.	+
TDU_consensed_contig_44644	5	1318	TDU_consensed_contig_44644,TPO_consensed_contig_33607	.	+
TDU_consensed_contig_44651	10	1570	TDU_consensed_contig_44651,TPO_consensed_contig_98890	.	+
TDU_consensed_contig_44652	462	1286	TDU_consensed_contig_44652,TPO_consensed_contig_18974	.	+
TDU_consensed_contig_44660	106	885	TDU_consensed_contig_44660,TPO_consensed_contig_18432	.	+
TDU_consensed_contig_44664	11	1015	TDU_consensed_contig_44664,TPO_consensed_contig_32967	.	+
TDU_consensed_contig_44665	0	689	TDU_consensed_contig_44665,TPO_consensed_contig_32488	.	+
TDU_consensed_contig_44676	143	1769	TDU_consensed_contig_44676,TPO_consensed_contig_98986	.	+
TDU_consensed_contig_44682	0	1353	TDU_consensed_contig_44682,TPO_consensed_contig_97597	.	+
TDU_consensed_contig_44702	1404	2027	TDU_consensed_contig_44702,TPO_consensed_contig_111648	.	+
TDU_consensed_contig_44708	1	1379	TDU_consensed_contig_44708,TPO_consensed_contig_89546	.	+
TDU_consensed_contig_44721	0	776	TDU_consensed_contig_44721,TPO_consensed_contig_111081	.	+
TDU_consensed_contig_44724	13	802	TDU_consensed_contig_44724,TPO_consensed_contig_18141	.	+
TDU_consensed_contig_44727	10	849	TDU_consensed_contig_44727,TPO_consensed_contig_24405	.	+
TDU_consensed_contig_44729	92	1387	TDU_consensed_contig_44729,TPO_consensed_contig_40266	.	+
TDU_consensed_contig_44732	0	506	TDU_consensed_contig_44732,TPO_consensed_contig_67874	.	+
TDU_consensed_contig_44734	0	527	TDU_consensed_contig_44734,TPO_consensed_contig_39069	.	+
TDU_consensed_contig_44735	40	826	TDU_consensed_contig_44735,TPO_consensed_contig_12997	.	+
TDU_consensed_contig_44740	1	1194	TDU_consensed_contig_44740,TPO_consensed_contig_63613	.	+
TDU_consensed_contig_44742	2	678	TDU_consensed_contig_44742,TPO_consensed_contig_46294	.	+
TDU_consensed_contig_44754	1	1511	TDU_consensed_contig_44754,TPO_consensed_contig_64741	.	+
TDU_consensed_contig_44782	210	2473	TDU_consensed_contig_44782,TPO_consensed_contig_27596	.	+
TDU_consensed_contig_44784	4	2171	TDU_consensed_contig_44784,TPO_consensed_contig_96778	.	+
TDU_consensed_contig_44788	44	2093	TDU_consensed_contig_44788,TPO_consensed_contig_18915	.	+
TDU_consensed_contig_44789	3	1415	TDU_consensed_contig_44789,TPO_consensed_contig_24588	.	+
TDU_consensed_contig_44794	1	707	TDU_consensed_contig_44794,TPO_consensed_contig_27546	.	+
TDU_consensed_contig_44795	187	1915	TDU_consensed_contig_44795,TPO_consensed_contig_85690	.	+
TDU_consensed_contig_44797	0	2176	TDU_consensed_contig_44797,TPO_consensed_contig_19629	.	+
TDU_consensed_contig_44800	0	653	TDU_consensed_contig_44800,TPO_consensed_contig_97714	.	+
TDU_consensed_contig_44801	10	1593	TDU_consensed_contig_44801,TPO_consensed_contig_16745	.	+
TDU_consensed_contig_44825	0	981	TDU_consensed_contig_44825,TPO_consensed_contig_111813	.	+
TDU_consensed_contig_44851	93	2119	TDU_consensed_contig_44851,TPO_consensed_contig_22377	.	+
TDU_consensed_contig_44854	0	752	TDU_consensed_contig_44854,TPO_consensed_contig_10184	.	+
TDU_consensed_contig_44861	0	748	TDU_consensed_contig_44861,TPO_consensed_contig_36192	.	+
TDU_consensed_contig_44884	4	1835	TDU_consensed_contig_44884,TPO_consensed_contig_42878	.	+
TDU_consensed_contig_44892	53	648	TDU_consensed_contig_44892,TPO_consensed_contig_53178	.	+
TDU_consensed_contig_44893	0	4157	TDU_consensed_contig_44893,TPO_consensed_contig_96366	.	+
TDU_consensed_contig_44900	0	680	TDU_consensed_contig_44900,TPO_consensed_contig_63387	.	+
TDU_consensed_contig_44905	16	1227	TDU_consensed_contig_44905,TPO_consensed_contig_10163	.	+
TDU_consensed_contig_44906	13	2030	TDU_consensed_contig_44906,TPO_consensed_contig_43231	.	+
TDU_consensed_contig_44907	13	1939	TDU_consensed_contig_44907,TPO_consensed_contig_62469	.	+
TDU_consensed_contig_44908	13	2091	TDU_consensed_contig_44908,TPO_consensed_contig_43227	.	+
TDU_consensed_contig_44910	13	1878	TDU_consensed_contig_44910,TPO_consensed_contig_62503	.	+
TDU_consensed_contig_44917	0	1215	TDU_consensed_contig_44917,TPO_consensed_contig_3158	.	+
TDU_consensed_contig_44919	6	672	TDU_consensed_contig_44919,TPO_consensed_contig_27886	.	+
TDU_consensed_contig_44939	1197	2156	TDU_consensed_contig_44939,TPO_consensed_contig_9404	.	+
TDU_consensed_contig_44946	0	732	TDU_consensed_contig_44946,TPO_consensed_contig_39693	.	+
TDU_consensed_contig_44951	0	904	TDU_consensed_contig_44951,TPO_consensed_contig_108933	.	+
TDU_consensed_contig_44958	1	925	TDU_consensed_contig_44958,TPO_consensed_contig_62289	.	+
TDU_consensed_contig_44973	239	947	TDU_consensed_contig_44973,TPO_consensed_contig_71763	.	+
TDU_consensed_contig_44975	154	2099	TDU_consensed_contig_44975,TPO_consensed_contig_9225	.	+
TDU_consensed_contig_44989	23	3352	TDU_consensed_contig_44989,TPO_consensed_contig_12774	.	+
TDU_consensed_contig_45012	0	3675	TDU_consensed_contig_45012,TPO_consensed_contig_5929	.	+
TDU_consensed_contig_45014	13	1538	TDU_consensed_contig_45014,TPO_consensed_contig_8890	.	+
TDU_consensed_contig_45017	1428	2151	TDU_consensed_contig_45017,TPO_consensed_contig_91926	.	+
TDU_consensed_contig_45018	10	1565	TDU_consensed_contig_45018,TPO_consensed_contig_33866	.	+
TDU_consensed_contig_45050	13	1154	TDU_consensed_contig_45050,TPO_consensed_contig_84380	.	+
TDU_consensed_contig_45093	0	503	TDU_consensed_contig_45093,TPO_consensed_contig_23908	.	+
TDU_consensed_contig_45112	0	1379	TDU_consensed_contig_45112,TPO_consensed_contig_13001	.	+
TDU_consensed_contig_45122	57	983	TDU_consensed_contig_45122,TPO_consensed_contig_68603	.	+
TDU_consensed_contig_45140	9	598	TDU_consensed_contig_45140,TPO_consensed_contig_61849	.	+
TDU_consensed_contig_45154	0	665	TDU_consensed_contig_45154,TPO_consensed_contig_21166	.	+
TDU_consensed_contig_45155	7	1953	TDU_consensed_contig_45155,TPO_consensed_contig_88325	.	+
TDU_consensed_contig_45156	9	783	TDU_consensed_contig_45156,TPO_consensed_contig_25250	.	+
TDU_consensed_contig_45157	1	922	TDU_consensed_contig_45157,TPO_consensed_contig_11623	.	+
TDU_consensed_contig_45161	0	1098	TDU_consensed_contig_45161,TPO_consensed_contig_36729	.	+
TDU_consensed_contig_45165	839	1414	TDU_consensed_contig_45165,TPO_consensed_contig_94954	.	+
TDU_consensed_contig_45175	122	942	TDU_consensed_contig_45175,TPO_consensed_contig_101378	.	+
TDU_consensed_contig_45189	0	1706	TDU_consensed_contig_45189,TPO_consensed_contig_91024	.	+
TDU_consensed_contig_45191	2	879	TDU_consensed_contig_45191,TPO_consensed_contig_58756	.	+
TDU_consensed_contig_45196	188	715	TDU_consensed_contig_45196,TPO_consensed_contig_101314	.	+
TDU_consensed_contig_45198	1472	2246	TDU_consensed_contig_45198,TPO_consensed_contig_92330	.	+
TDU_consensed_contig_45229	0	1682	TDU_consensed_contig_45229,TPO_consensed_contig_33055	.	+
TDU_consensed_contig_3008	0	815	TDU_consensed_contig_3008,TPO_consensed_contig_13425	.	+
TDU_consensed_contig_3011	99	1621	TDU_consensed_contig_3011,TPO_consensed_contig_71411	.	+
TDU_consensed_contig_3018	35	3268	TDU_consensed_contig_3018,TPO_consensed_contig_4362	.	+
TDU_consensed_contig_3023	53	608	TDU_consensed_contig_3023,TPO_consensed_contig_94386	.	+
TDU_consensed_contig_3024	7	787	TDU_consensed_contig_3024,TPO_consensed_contig_85698	.	+
TDU_consensed_contig_3029	132	2280	TDU_consensed_contig_3029,TPO_consensed_contig_104198	.	+
TDU_consensed_contig_3037	33	1562	TDU_consensed_contig_3037,TPO_consensed_contig_33968	.	+
TDU_consensed_contig_3048	75	1258	TDU_consensed_contig_3048,TPO_consensed_contig_58975	.	+
TDU_consensed_contig_3055	34	1379	TDU_consensed_contig_3055,TPO_consensed_contig_89135	.	+
TDU_consensed_contig_3056	787	2001	TDU_consensed_contig_3056,TPO_consensed_contig_97008	.	+
TDU_consensed_contig_3057	284	1852	TDU_consensed_contig_3057,TPO_consensed_contig_57718	.	+
TDU_consensed_contig_3065	3	1815	TDU_consensed_contig_3065,TPO_consensed_contig_96819	.	+
TDU_consensed_contig_3066	3	1203	TDU_consensed_contig_3066,TPO_consensed_contig_104041	.	+
TDU_consensed_contig_3068	23	1267	TDU_consensed_contig_3068,TPO_consensed_contig_9375	.	+
TDU_consensed_contig_3073	1753	2384	TDU_consensed_contig_3073,TPO_consensed_contig_85207	.	+
TDU_consensed_contig_3075	0	803	TDU_consensed_contig_3075,TPO_consensed_contig_42507	.	+
TDU_consensed_contig_3076	0	1324	TDU_consensed_contig_3076,TPO_consensed_contig_4409	.	+
TDU_consensed_contig_3077	15	634	TDU_consensed_contig_3077,TPO_consensed_contig_57391	.	+
TDU_consensed_contig_3080	0	1879	TDU_consensed_contig_3080,TPO_consensed_contig_93528	.	+
TDU_consensed_contig_3086	19	1622	TDU_consensed_contig_3086,TPO_consensed_contig_43224	.	+
TDU_consensed_contig_3091	36	883	TDU_consensed_contig_3091,TPO_consensed_contig_105167	.	+
TDU_consensed_contig_3096	437	1549	TDU_consensed_contig_3096,TPO_consensed_contig_83818	.	+
TDU_consensed_contig_3101	0	890	TDU_consensed_contig_3101,TPO_consensed_contig_59181	.	+
TDU_consensed_contig_3111	0	967	TDU_consensed_contig_3111,TPO_consensed_contig_72401	.	+
TDU_consensed_contig_3112	0	967	TDU_consensed_contig_3112,TPO_consensed_contig_70942	.	+
TDU_consensed_contig_3114	0	1160	TDU_consensed_contig_3114,TPO_consensed_contig_59339	.	+
TDU_consensed_contig_3117	105	1009	TDU_consensed_contig_3117,TPO_consensed_contig_18305	.	+
TDU_consensed_contig_3120	26	937	TDU_consensed_contig_3120,TPO_consensed_contig_90851	.	+
TDU_consensed_contig_3122	95	830	TDU_consensed_contig_3122,TPO_consensed_contig_36707	.	+
TDU_consensed_contig_3129	280	2463	TDU_consensed_contig_3129,TPO_consensed_contig_24378	.	+
TDU_consensed_contig_3130	106	2514	TDU_consensed_contig_3130,TPO_consensed_contig_16622	.	+
TDU_consensed_contig_3139	54	1154	TDU_consensed_contig_3139,TPO_consensed_contig_39953	.	+
TDU_consensed_contig_3142	0	1100	TDU_consensed_contig_3142,TPO_consensed_contig_36634	.	+
TDU_consensed_contig_3156	61	1027	TDU_consensed_contig_3156,TPO_consensed_contig_38059	.	+
TDU_consensed_contig_3158	55	1445	TDU_consensed_contig_3158,TPO_consensed_contig_102319	.	+
TDU_consensed_contig_3171	12	1040	TDU_consensed_contig_3171,TPO_consensed_contig_36767	.	+
TDU_consensed_contig_3174	0	1294	TDU_consensed_contig_3174,TPO_consensed_contig_105040	.	+
TDU_consensed_contig_3175	37	990	TDU_consensed_contig_3175,TPO_consensed_contig_40911	.	+
TDU_consensed_contig_3180	402	1314	TDU_consensed_contig_3180,TPO_consensed_contig_38363	.	+
TDU_consensed_contig_3193	752	1900	TDU_consensed_contig_3193,TPO_consensed_contig_35325	.	+
TDU_consensed_contig_3199	81	1331	TDU_consensed_contig_3199,TPO_consensed_contig_38580	.	+
TDU_consensed_contig_3202	382	1233	TDU_consensed_contig_3202,TPO_consensed_contig_110674	.	+
TDU_consensed_contig_3203	354	930	TDU_consensed_contig_3203,TPO_consensed_contig_50685	.	+
TDU_consensed_contig_3208	7	1379	TDU_consensed_contig_3208,TPO_consensed_contig_18483	.	+
TDU_consensed_contig_3209	1	808	TDU_consensed_contig_3209,TPO_consensed_contig_91046	.	+
TDU_consensed_contig_3219	5	1250	TDU_consensed_contig_3219,TPO_consensed_contig_41831	.	+
TDU_consensed_contig_3238	63	1875	TDU_consensed_contig_3238,TPO_consensed_contig_39421	.	+
TDU_consensed_contig_3241	31	1611	TDU_consensed_contig_3241,TPO_consensed_contig_83383	.	+
TDU_consensed_contig_3247	72	812	TDU_consensed_contig_3247,TPO_consensed_contig_90880	.	+
TDU_consensed_contig_3249	6	870	TDU_consensed_contig_3249,TPO_consensed_contig_42485	.	+
TDU_consensed_contig_3251	0	999	TDU_consensed_contig_3251,TPO_consensed_contig_39500	.	+
TDU_consensed_contig_3273	5	584	TDU_consensed_contig_3273,TPO_consensed_contig_90324	.	+
TDU_consensed_contig_3275	13	3269	TDU_consensed_contig_3275,TPO_consensed_contig_71085	.	+
TDU_consensed_contig_3282	27	526	TDU_consensed_contig_3282,TPO_consensed_contig_26878	.	+
TDU_consensed_contig_3291	1	1673	TDU_consensed_contig_3291,TPO_consensed_contig_61765	.	+
TDU_consensed_contig_3297	7	1984	TDU_consensed_contig_3297,TPO_consensed_contig_45632	.	+
TDU_consensed_contig_45238	34	1390	TDU_consensed_contig_45238,TPO_consensed_contig_43492	.	+
TDU_consensed_contig_45245	81	1360	TDU_consensed_contig_45245,TPO_consensed_contig_12351	.	+
TDU_consensed_contig_45267	6	1230	TDU_consensed_contig_45267,TPO_consensed_contig_16842	.	+
TDU_consensed_contig_45270	0	667	TDU_consensed_contig_45270,TPO_consensed_contig_22526	.	+
TDU_consensed_contig_45271	119	1039	TDU_consensed_contig_45271,TPO_consensed_contig_42158	.	+
TDU_consensed_contig_45272	1	1692	TDU_consensed_contig_45272,TPO_consensed_contig_96554	.	+
TDU_consensed_contig_45276	9	2993	TDU_consensed_contig_45276,TPO_consensed_contig_11354	.	+
TDU_consensed_contig_45289	0	581	TDU_consensed_contig_45289,TPO_consensed_contig_8984	.	+
TDU_consensed_contig_45294	6	1069	TDU_consensed_contig_45294,TPO_consensed_contig_113232	.	+
TDU_consensed_contig_45297	147	920	TDU_consensed_contig_45297,TPO_consensed_contig_39844	.	+
TDU_consensed_contig_45304	28	2741	TDU_consensed_contig_45304,TPO_consensed_contig_105268	.	+
TDU_consensed_contig_45310	72	999	TDU_consensed_contig_45310,TPO_consensed_contig_36887	.	+
TDU_consensed_contig_45313	47	1355	TDU_consensed_contig_45313,TPO_consensed_contig_112601	.	+
TDU_consensed_contig_45331	1783	3711	TDU_consensed_contig_45331,TPO_consensed_contig_26251	.	+
TDU_consensed_contig_45339	93	1639	TDU_consensed_contig_45339,TPO_consensed_contig_42254	.	+
TDU_consensed_contig_45352	20	1760	TDU_consensed_contig_45352,TPO_consensed_contig_83765	.	+
TDU_consensed_contig_45402	1	1728	TDU_consensed_contig_45402,TPO_consensed_contig_32525	.	+
TDU_consensed_contig_45404	24	1059	TDU_consensed_contig_45404,TPO_consensed_contig_34874	.	+
TDU_consensed_contig_45439	12	967	TDU_consensed_contig_45439,TPO_consensed_contig_76680	.	+
TDU_consensed_contig_45450	30	1200	TDU_consensed_contig_45450,TPO_consensed_contig_33936	.	+
TDU_consensed_contig_45455	0	712	TDU_consensed_contig_45455,TPO_consensed_contig_72520	.	+
TDU_consensed_contig_45484	26	1128	TDU_consensed_contig_45484,TPO_consensed_contig_90601	.	+
TDU_consensed_contig_45489	0	919	TDU_consensed_contig_45489,TPO_consensed_contig_102749	.	+
TDU_consensed_contig_45491	0	835	TDU_consensed_contig_45491,TPO_consensed_contig_36054	.	+
TDU_consensed_contig_45525	71	1829	TDU_consensed_contig_45525,TPO_consensed_contig_39688	.	+
TDU_consensed_contig_45531	0	1197	TDU_consensed_contig_45531,TPO_consensed_contig_114608	.	+
TDU_consensed_contig_45539	1	626	TDU_consensed_contig_45539,TPO_consensed_contig_110993	.	+
TDU_consensed_contig_45553	138	1903	TDU_consensed_contig_45553,TPO_consensed_contig_12720	.	+
TDU_consensed_contig_45568	131	801	TDU_consensed_contig_45568,TPO_consensed_contig_87571	.	+
TDU_consensed_contig_45578	15	781	TDU_consensed_contig_45578,TPO_consensed_contig_65213	.	+
TDU_consensed_contig_45595	201	3727	TDU_consensed_contig_45595,TPO_consensed_contig_10207	.	+
TDU_consensed_contig_45596	15	1858	TDU_consensed_contig_45596,TPO_consensed_contig_5124	.	+
TDU_consensed_contig_45620	679	1320	TDU_consensed_contig_45620,TPO_consensed_contig_50333	.	+
TDU_consensed_contig_45623	0	1741	TDU_consensed_contig_45623,TPO_consensed_contig_19504	.	+
TDU_consensed_contig_45624	39	862	TDU_consensed_contig_45624,TPO_consensed_contig_75042	.	+
TDU_consensed_contig_45625	0	1648	TDU_consensed_contig_45625,TPO_consensed_contig_19503	.	+
TDU_consensed_contig_45637	3	991	TDU_consensed_contig_45637,TPO_consensed_contig_22292	.	+
TDU_consensed_contig_45641	65	1046	TDU_consensed_contig_45641,TPO_consensed_contig_68736	.	+
TDU_consensed_contig_45689	1	4712	TDU_consensed_contig_45689,TPO_consensed_contig_12253	.	+
TDU_consensed_contig_45696	372	2551	TDU_consensed_contig_45696,TPO_consensed_contig_85881	.	+
TDU_consensed_contig_45705	10	2755	TDU_consensed_contig_45705,TPO_consensed_contig_41218	.	+
TDU_consensed_contig_45720	2	1066	TDU_consensed_contig_45720,TPO_consensed_contig_116350	.	+
TDU_consensed_contig_45721	9	943	TDU_consensed_contig_45721,TPO_consensed_contig_64158	.	+
TDU_consensed_contig_45723	9	1028	TDU_consensed_contig_45723,TPO_consensed_contig_64162	.	+
TDU_consensed_contig_45735	90	1138	TDU_consensed_contig_45735,TPO_consensed_contig_97403	.	+
TDU_consensed_contig_45739	0	496	TDU_consensed_contig_45739,TPO_consensed_contig_73643	.	+
TDU_consensed_contig_45749	81	1569	TDU_consensed_contig_45749,TPO_consensed_contig_47232	.	+
TDU_consensed_contig_45751	0	668	TDU_consensed_contig_45751,TPO_consensed_contig_115448	.	+
TDU_consensed_contig_45753	2	2373	TDU_consensed_contig_45753,TPO_consensed_contig_12607	.	+
TDU_consensed_contig_45794	0	1122	TDU_consensed_contig_45794,TPO_consensed_contig_96437	.	+
TDU_consensed_contig_45804	96	1818	TDU_consensed_contig_45804,TPO_consensed_contig_94433	.	+
TDU_consensed_contig_45805	0	1001	TDU_consensed_contig_45805,TPO_consensed_contig_92352	.	+
TDU_consensed_contig_45806	22	1244	TDU_consensed_contig_45806,TPO_consensed_contig_38242	.	+
TDU_consensed_contig_45807	13	905	TDU_consensed_contig_45807,TPO_consensed_contig_105397	.	+
TDU_consensed_contig_45809	3	864	TDU_consensed_contig_45809,TPO_consensed_contig_59016	.	+
TDU_consensed_contig_45810	56	1082	TDU_consensed_contig_45810,TPO_consensed_contig_96487	.	+
TDU_consensed_contig_45813	44	1424	TDU_consensed_contig_45813,TPO_consensed_contig_12048	.	+
TDU_consensed_contig_45814	33	909	TDU_consensed_contig_45814,TPO_consensed_contig_37240	.	+
TDU_consensed_contig_45819	0	2661	TDU_consensed_contig_45819,TPO_consensed_contig_25884	.	+
TDU_consensed_contig_45820	0	667	TDU_consensed_contig_45820,TPO_consensed_contig_105254	.	+
TDU_consensed_contig_45821	3	1448	TDU_consensed_contig_45821,TPO_consensed_contig_96172	.	+
TDU_consensed_contig_45822	15	1238	TDU_consensed_contig_45822,TPO_consensed_contig_85277	.	+
TDU_consensed_contig_45823	110	905	TDU_consensed_contig_45823,TPO_consensed_contig_46366	.	+
TDU_consensed_contig_45824	106	1253	TDU_consensed_contig_45824,TPO_consensed_contig_116437	.	+
TDU_consensed_contig_45825	12	1671	TDU_consensed_contig_45825,TPO_consensed_contig_46301	.	+
TDU_consensed_contig_45826	22	711	TDU_consensed_contig_45826,TPO_consensed_contig_98908	.	+
[truncated: 13,587 more rows]
